# Supplementary material for: Copper oxide nanoparticle mediated ‘click chemistry’ for the synthesis of mono-, bis- and tris-triazole derivatives from 10,10-dipropargyl-9-anthrone as a key building block
Source: Royal Society of Chemistry journal article supplement (doi:10.1039/c3ra44869j), 2014-01-01

## Electronic Supporting Information

# Copper oxide nanoparticle mediated ‘click chemistry’ for the synthesis of mono-, bis- and tris-triazole derivatives using 10,10-dipropargyl-9-anthrone as a key building block

Prasanta Ray Bagdi,<sup>a</sup> R. Sidick Basha,<sup>a</sup> Pranjal Kumar Baruah<sup>c</sup> and Abu T. Khan<sup>\*a,b</sup>

<sup>a</sup>*Department of Chemistry, Indian Institute of Technology Guwahati, Guwahati 781 039, India*

<sup>b</sup>*Vice-Chancellor, Aliah University, DN 18, 8<sup>th</sup> Floor, Sector V, Kolkata-700 091, India*

<sup>c</sup>*Department of Chemical Science, Gauhati university, Guwahati 781 014, India*

*Tel.: +91 361 2582305; fax: +91 361 2582349*

*E-mail: atk@iitg.ernet.in (A.T. Khan)*

|                                                                            |       |
|----------------------------------------------------------------------------|-------|
| Title page                                                                 | 1     |
| Experimental section                                                       | 2     |
| Reuse of CuO-Nanoparticle for the Synthesis of <b>9b</b>                   | 3     |
| ORTEP diagram and Crystal Data for compound <b>8b</b> & <b>9b</b>          | 4-6   |
| <sup>1</sup> H NMR and <sup>13</sup> C NMR spectra data of Compounds       | 7-15  |
| Copies of <sup>1</sup> H NMR, and <sup>13</sup> C NMR spectra of Compounds | 16-79 |

## I. General Information and Methods.

IR spectra were recorded on IR spectrophotometer.  $^1\text{H}$  and  $^{13}\text{C}$  NMR spectra were recorded on 400 MHz spectrometer TMS as internal reference; chemical shifts ( $\delta$  scale) are reported in parts per million (ppm).  $^1\text{H}$  NMR Spectra are reported in the order: multiplicity, coupling constant (J value) in hertz (Hz) and no of protons; signals were characterized as s (singlet), d (doublet), t (triplet), q (quatret), m (multiplet) and bs (broad). Elemental analyses were carried out using CHNS/O analyzer. The X-ray crystal structures were determined with a diffractometer. Complete crystallographic data of **8b** (CCDC no. 942856) and **9b** (CCDC no. 921613) for the structural analysis have been deposited with the Cambridge Crystallographic Data Centre, Copies of this information may be obtained free of charge from the Director, Cambridge Crystallographic Data Centre, 12 Union Road, Cambridge CB2 1EZ, UK, (fax: +44-1223-336033, e-mail: [deposit@ccdc.cam.ac.uk](mailto:deposit@ccdc.cam.ac.uk) or via: [www.ccdc.cam.ac.uk](http://www.ccdc.cam.ac.uk)). The copper oxide nanoparticle were purchased from Sigma-Aldrich.

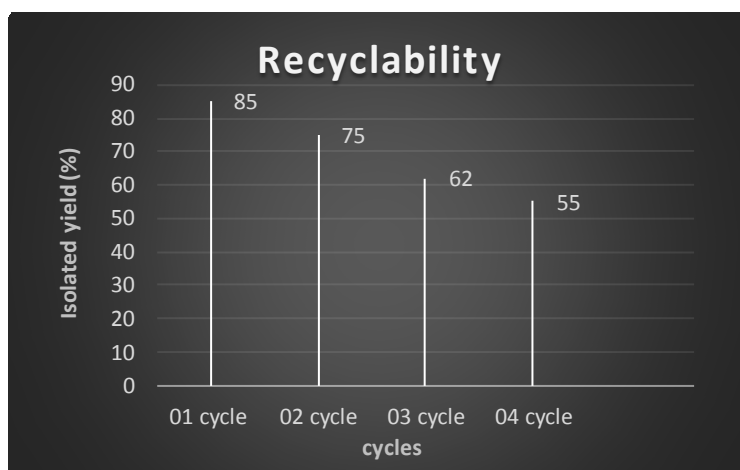

**Fig. 1** Recyclability of copper oxide nanoparticle of **9b**

Recyclability of the catalyst<sup>a</sup> in **9b**

| Entry | mmol scale | Amount of catalyst | Recovered catalyst | Time (h) | Yield (%) |
|-------|------------|--------------------|--------------------|----------|-----------|
| 01    | 04         | 32                 | 28                 | 1.5      | 85        |
| 02    | 3.5        | 28                 | 24                 | 2        | 75        |
| 03    | 3          | 24                 | 20                 | 2.5      | 62        |
| 04    | 2.5        | 20                 | 15                 | 3        | 55        |

<sup>a</sup>The copper oxide nanoparticle was reused as follows: it was filtered off, washed with dichloromethane and finally dried before use for next cycle.

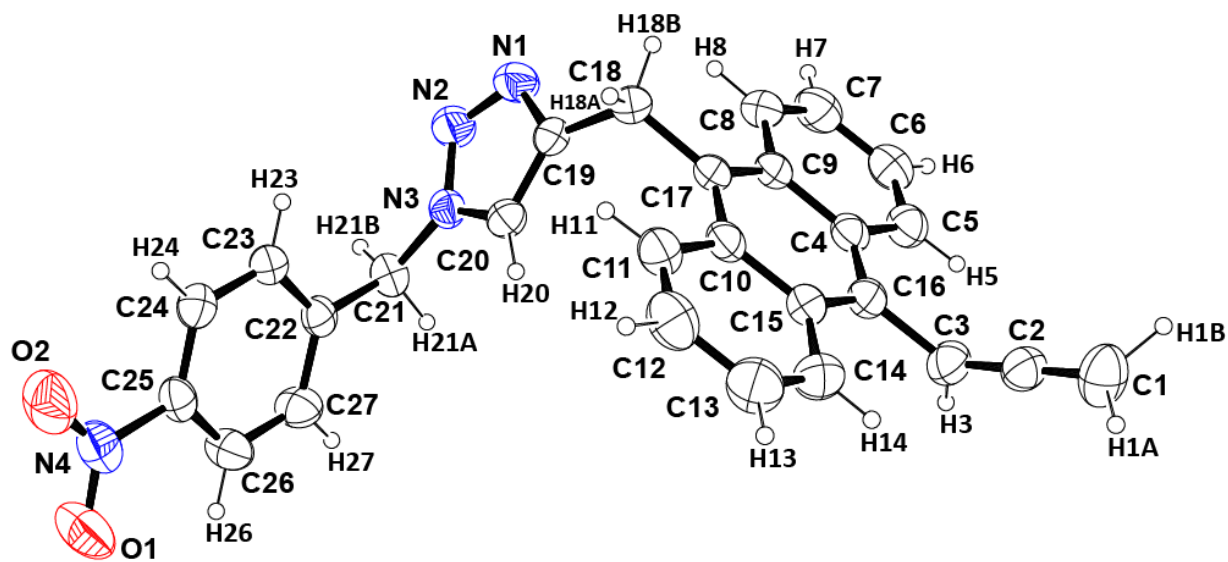

Fig. 2 30% probability of ORTEP ellipsoids of **8b**

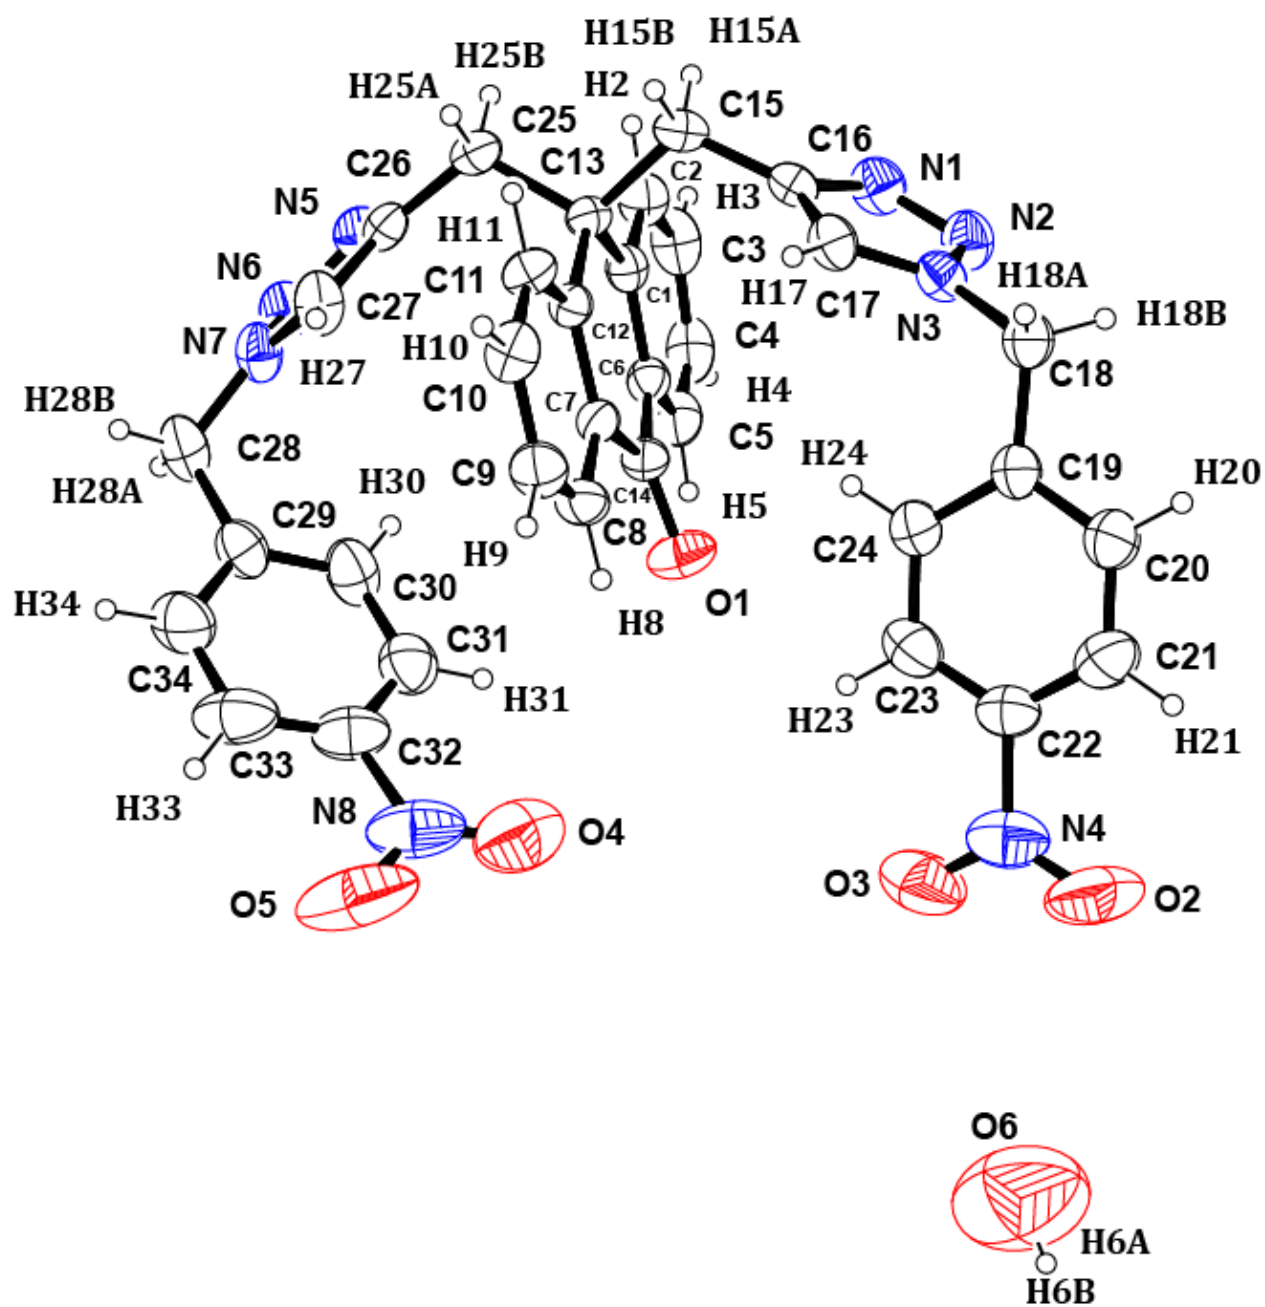

Fig. 3 30% probability of ORTEP ellipsoids of 9b

**Table 6** Crystal Data and Structure Refinement for Compound **8b** and **9b**

| Entry | Identification code   | Compound <b>8b</b>                                                        | Compound <b>9b</b>                                                         |
|-------|-----------------------|---------------------------------------------------------------------------|----------------------------------------------------------------------------|
| 01    | Empirical formula     | C27 H20 N4 O2                                                             | C34 H27.05 N8 O5.53                                                        |
| 02    | Formula weight        | 432.47                                                                    | 636.09                                                                     |
| 03    | Temperature           | 296(2) K                                                                  | 296(2) K                                                                   |
| 04    | Wavelength            | 0.71073                                                                   | 0.71073                                                                    |
| 05    | Radiation type        | Mo K $\alpha$                                                             | Mo K $\alpha$                                                              |
| 06    | Radiation source      | 'fine-focus sealed tube'                                                  | fine-focus sealed tube                                                     |
| 07    | Crystal system        | monoclinic                                                                | monoclinic                                                                 |
| 08    | Space group           | P 21/n                                                                    | P 21/c                                                                     |
| 09    | Cell length           | a 12.4688(7) b 10.2492(6) c<br>16.9379(9)                                 | a 17.5453(9) b 9.9306(6) c<br>18.5780(10)                                  |
| 10    | Cell Angle            | $\alpha$ 90.0 $\beta$ 97.094(5)<br>$\delta$ 90.0                          | $\alpha$ 90.0 $\beta$ 108.562(2)<br>$\delta$ 90.0                          |
| 11    | Cell Volume           | 2148.0 (2)                                                                | 3068.6(3)                                                                  |
| 12    | Density               | 1.337                                                                     | 1.395                                                                      |
| 13    | Completeness to theta | 25.00° / 99.8%                                                            | 25.25° / 96.9%                                                             |
| 14    | Absorption correction | multi-scan                                                                | multi-scan                                                                 |
| 15    | Refinement method     | Full-matrix least-squares on<br>F2                                        | Full-matrix least-squares on F2                                            |
| 16    | Index ranges          | -14 $\leq$ h $\leq$ 14, -12 $\leq$ k $\leq$ 6, -<br>12 $\leq$ l $\leq$ 20 | -20 $\leq$ h $\leq$ 19, -11 $\leq$ k $\leq$ 11, -<br>22 $\leq$ l $\leq$ 22 |
| 17    | Reflection number     | 3780                                                                      | 5375                                                                       |
| 18    | Theta range           | 2.94-25.00                                                                | 1.22-25.25                                                                 |
| 19    | Cell formula units Z  | 4                                                                         | 4                                                                          |
| 20    | CCDC no               | 942856                                                                    | 921613                                                                     |

**10,10-dipropargyl-9-anthrone (2):** Yield = 0.256 g, 95%, white solid, mp 210-211 °C, <sup>1</sup>H NMR (400 MHz, CDCl<sub>3</sub>): δ 8.42-8.39 (m, 2H), 7.73-7.67 (m, 4H), 7.54-7.48 (m, 2H), 3.09 (d, *J* = 2.4 Hz, 4H), 1.66 (t, *J* = 2.4 Hz, 2H); <sup>13</sup>C NMR (100 MHz, CDCl<sub>3</sub>): δ 183.8, 144.6, 133.7, 132.6, 127.8, 127.7, 126.0, 79.5, 71.7, 45.2, 33.5; IR (KBr)<sub>v<sub>max</sub></sub> 3286, 3255, 3073, 2914, 2116, 1649, 1600, 1585, 1459, 1440, 1324, 1178 cm<sup>-1</sup>; Anal. calcd for C<sub>20</sub>H<sub>14</sub>O: C, 88.86; H, 5.22. found C, 88.75; H, 5.15.

**9-allenyl-10-prop-2-ynyl-anthracene (4):** Yield = 0.227 g, 90%, yellow solid, mp 168-169 °C, <sup>1</sup>H NMR (400 MHz, CDCl<sub>3</sub>): δ 8.45 (d, *J* = 8.8 Hz, 2H), 8.33 (d, *J* = 8.8 Hz, 2H), 7.59-7.50 (m, 4H), 6.95 (t, *J* = 7.2 Hz, 1H), 5.05 (d, *J* = 7.2 Hz, 2H), 4.44 (d, *J* = 2.4 Hz, 2H), 2.07 (t, *J* = 2.8 Hz, 1H); <sup>13</sup>C NMR (100 MHz, CDCl<sub>3</sub>): δ 211.2, 129.7, 129.6, 128.2, 127.8, 126.8, 126.2, 125.4, 124.6, 88.1, 82.4, 75.6, 69.8, 17.9; IR (KBr)<sub>v<sub>max</sub></sub> 3284, 3043, 2972, 2109, 1945, 1622, 1442, 1374, 1314, 1180 cm<sup>-1</sup>; Anal. calcd for C<sub>20</sub>H<sub>14</sub>: C, 94.45; H, 5.55. found C, 94.34; H, 5.49.

**10,10-diprop-2-ynyl-9-(prop-2-yn-1-oxy)-9,10-dihydroanthracene (5):** Yield = 0.263 g, 85%, pale yellow solid, mp 96-97 °C, <sup>1</sup>H NMR (400 MHz, CDCl<sub>3</sub>): δ 7.62 (d, *J* = 8.0 Hz, 2H), 7.53 (d, *J* = 7.2 Hz, 2H), 7.39 (t, *J* = 7.2 Hz, 2H), 7.33 (t, *J* = 7.2 Hz, 2H), 5.61 (s, 1H), 4.03 (d, *J* = 2.4 Hz, 2H), 3.34 (t, *J* = 2.8 Hz, 2H), 2.85 (d, *J* = 2.4 Hz, 2H), 2.49 (t, *J* = 2.4 Hz, 1H), 1.92 (t, *J* = 2.4 Hz, 1H), 1.59 (t, *J* = 2.4 Hz, 1H); <sup>13</sup>C NMR (100 MHz, CDCl<sub>3</sub>): δ 141.3, 134.8, 130.0, 128.6, 127.2, 126.7, 126.0, 81.3, 81.0, 80.0, 75.7, 75.1, 71.9, 70.7, 54.3, 46.1, 35.9, 26.6; IR (KBr)<sub>v<sub>max</sub></sub> 3286, 3066, 3028, 2923, 2853, 2116, 1649, 1599, 1484, 1446, 1323 cm<sup>-1</sup>; Anal. calcd for C<sub>23</sub>H<sub>18</sub>O: C, 89.00; H, 5.85. found C, 88.88; H, 5.78.

**1-benzyl-4-((9-(propa-1,2-dienyl)anthracen-10-yl)methyl)-1H-1,2,3-triazole (8a):** Yield = 0.348 g, 90%, yellow solid, mp 177-178 °C, <sup>1</sup>H NMR (400 MHz, CDCl<sub>3</sub>): δ 8.38 (d, *J* = 9.6 Hz, 2H), 8.21 (d, *J* = 9.2 Hz, 2H), 7.44-7.41 (m, 4H), 7.18-7.16 (m, 3H), 7.01 (brs, 2H), 6.88 (t, *J* = 7.6 Hz, 1H), 6.66 (s, 1H), 5.22 (s, 2H), 4.99 (s, 2H), 4.98 (s, 2H); <sup>13</sup>C NMR (100 MHz, CDCl<sub>3</sub>): δ 211.2, 134.9, 130.6, 129.9, 129.7, 129.1, 128.6, 127.9, 127.5, 126.7, 126.1, 125.9, 125.0, 121.9, 88.1, 75.7, 54.1, 25.3; IR (KBr)<sub>v<sub>max</sub></sub> 3120, 3064, 2953, 1946, 1662, 1550, 1444, 1318, 1215 cm<sup>-1</sup>; Anal. calcd for C<sub>27</sub>H<sub>21</sub>N<sub>3</sub>: C, 83.69; H, 5.46; N, 10.84. found C, 83.56; H, 5.39; N, 10.78.

**1-(4-nitrobenzyl)-4-((9-(propa-1,2-dienyl)anthracen-10-yl)methyl)-1H-1,2,3-triazole (8b):** Yield = 0.376 g, 87%, yellow solid, mp 153-154 °C, <sup>1</sup>H NMR (400 MHz, CDCl<sub>3</sub>): δ 8.44 (d, *J* = 8.8 Hz, 2H), 8.25 (d, *J* = 8.8 Hz, 2H), 8.06 (d, *J* = 8.4 Hz, 2H), 7.50-7.48 (m, 4H), 7.18 (d, *J* = 8.4 Hz, 2H), 6.93 (t, *J* = 7.6 Hz, 1H), 6.74 (s, 1H), 5.35 (s, 2H), 5.06 (s, 2H), 5.03 (s, 2H); <sup>13</sup>C NMR (100 MHz, CDCl<sub>3</sub>): δ 211.1,

148.5, 147.8, 141.7, 130.2, 129.7, 129.5, 128.3, 127.4, 126.6, 126.1, 125.4, 124.7, 124.0, 122.1, 87.9, 75.6, 52.8, 25.0; IR (KBr) $\nu_{\max}$  3135, 3075, 3051, 2963, 1946, 1605, 1520, 1443, 1344, 1261, 1209  $\text{cm}^{-1}$ ; Anal. calcd for  $\text{C}_{27}\text{H}_{20}\text{N}_4\text{O}_2$ : C, 74.98; H, 4.66; N, 12.95. found C, 74.89; H, 4.59; N, 12.85.

**1-(4-methoxybenzyl)-4-((9-(propa-1,2-dienyl)anthracen-10-yl)methyl)-1H-1,2,3-triazole (8c):** Yield = 0.354 g, 85%, yellow solid, mp 161-162 °C,  $^1\text{H}$  NMR (400 MHz,  $\text{CDCl}_3$ ):  $\delta$  8.45-8.42 (m, 2H), 8.28-8.26 (m, 2H), 7.51-7.45 (m, 4H), 7.02 (d,  $J = 8.4$  Hz, 2H), 6.94 (t,  $J = 7.6$  Hz, 1H), 6.74 (d,  $J = 7.6$  Hz, 2H), 6.68 (s, 1H), 5.21 (s, 2H), 5.05 (s, 2H), 5.04 (d,  $J = 7.6$  Hz, 2H), 3.72 (s, 3H);  $^{13}\text{C}$  NMR (100 MHz,  $\text{CDCl}_3$ ):  $\delta$  211.1, 159.7, 147.9, 130.6, 129.8, 129.5, 129.3, 126.7, 126.5, 125.9, 125.3, 124.9, 121.5, 114.3, 87.9, 75.6, 55.2, 53.5, 25.2; IR (KBr) $\nu_{\max}$  3127, 3068, 2962, 2932, 2836, 1946, 1611, 1513, 1441, 1302, 1249, 1209  $\text{cm}^{-1}$ ; Anal. calcd for  $\text{C}_{28}\text{H}_{23}\text{N}_3\text{O}$ : C, 80.55; H, 5.55; N, 10.06. found C, 80.46; H, 5.46; N, 9.98.

**4-((9-(propa-1,2-dienyl)anthracen-10-yl)methyl)-1-propyl-1H-1,2,3-triazole (8d):** Yield = 0.258 g, 76%, yellow solid, mp: 117-118 °C,  $^1\text{H}$  NMR (400 MHz,  $\text{CDCl}_3$ ):  $\delta$  8.46-8.44 (m, 2H), 8.29-8.27 (m, 2H), 7.52-7.47 (m, 4H), 6.95 (t,  $J = 7.2$  Hz, 1H), 6.68 (s, 1H), 5.06-5.04 (m, 4H), 4.04 (t,  $J = 7.6$  Hz, 2H), 1.74-1.68 (m, 2H), 0.78 (t,  $J = 7.2$  Hz, 3H);  $^{13}\text{C}$  NMR (100 MHz,  $\text{CDCl}_3$ ):  $\delta$  211.2, 147.7, 130.8, 129.9, 129.7, 127.4, 126.7, 126.1, 125.4, 125.0, 121.8, 88.1, 75.7, 51.9, 25.3, 23.7, 11.1; IR (KBr) $\nu_{\max}$  3119, 3068, 2966, 2931, 2875, 1950, 1620, 1550, 1443, 1383, 1262, 1218  $\text{cm}^{-1}$ ; Anal. calcd for  $\text{C}_{23}\text{H}_{21}\text{N}_3$ : C, 81.38; H, 6.24; N, 12.38. found C, 81.29; H, 6.15; N, 12.29.

**1-butyl-4-((10-(propa-1,2-dien-1-yl)anthracen-9-yl)methyl)-1H-1,2,3-triazole (8e):** Yield = 0.268 g, 76%, yellow solid, mp 120-121 °C,  $^1\text{H}$  NMR (400 MHz,  $\text{CDCl}_3$ ):  $\delta$  8.47-8.44 (m, 2H), 8.31-8.28 (m, 2H), 7.52-7.48 (m, 4H), 6.66 (t,  $J = 7.2$  Hz, 1H), 6.68 (s, 1H), 5.06-5.05 (m, 4H), 4.08 (t,  $J = 7.2$  Hz, 2H), 1.69-1.64 (m, 2H), 1.23-1.14 (m, 2H), 0.81 (t,  $J = 7.2$  Hz, 3H);  $^{13}\text{C}$  NMR (100 MHz,  $\text{CDCl}_3$ ):  $\delta$  211.2, 147.6, 130.7, 129.9, 129.6, 127.4, 126.6, 126.1, 125.4, 124.9, 121.7, 88.1, 75.6, 50.1, 32.2, 25.3, 19.8, 13.5; IR (KBr) $\nu_{\max}$  3120, 3070, 2962, 2929, 2871, 1951, 1599, 1460, 1385, 1261, 1217  $\text{cm}^{-1}$ ; Anal. calcd for  $\text{C}_{24}\text{H}_{23}\text{N}_3$ : C, 81.55; H, 6.56; N, 11.89. found C, 81.44; H, 6.45; N, 11.79.

**1-(sec-butyl)-4-((10-(propa-1,2-dien-1-yl)anthracen-9-yl)methyl)-1H-1,2,3-triazole (8f):** Yield = 0.282 g, 80%, yellow solid, mp 129-130 °C,  $^1\text{H}$  NMR (400 MHz,  $\text{CDCl}_3$ ):  $\delta$  8.46-8.44 (m, 2H), 8.30-8.28 (m, 2H), 7.51-7.48 (m, 4H), 6.96 (t,  $J = 6.8$  Hz, 1H), 6.68 (s, 1H), 5.08-5.05 (m, 4H), 4.33 (q,  $J = 7.2$  Hz, 1H), 1.73-1.62 (m, 2H), 1.32 (d,  $J = 6.8$  Hz, 3H), 0.68 (t,  $J = 7.2$  Hz, 3H);  $^{13}\text{C}$  NMR (100 MHz,  $\text{CDCl}_3$ ):  $\delta$



211.2, 147.4, 130.9, 130.1, 129.7, 127.3, 126.6, 126.1, 125.4, 125.1, 119.7, 88.2, 75.7, 58.9, 30.3, 25.5, 20.8, 10.5; IR (KBr) $\nu_{\max}$  3123, 3066, 2964, 2933, 2876, 1949, 1619, 1547, 1443, 1384, 1368, 1260, 1225  $\text{cm}^{-1}$ ; Anal. calcd for  $\text{C}_{24}\text{H}_{23}\text{N}_3$ : C, 81.55; H, 6.56; N, 11.89. found C, 81.45; H, 6.46; N, 11.80.

**1-hexyl-4-((10-(propa-1,2-dien-1-yl)anthracen-9-yl)methyl)-1H-1,2,3-triazole (8g):** Yield = 0.289 g, 76%, yellow solid, mp 141-142 °C,  $^1\text{H}$  NMR (400 MHz,  $\text{CDCl}_3$ ):  $\delta$  8.47-8.44 (m, 2H), 8.29-8.27 (m, 2H), 7.52-7.47 (m, 4H), 6.96 (t,  $J = 7.2$  Hz, 1H), 6.67 (s, 1H), 5.06-5.04 (m, 4H), 4.07 (t,  $J = 7.2$  Hz, 2H), 1.68-1.65 (m, 2H), 1.15-1.12 (m, 6H), 0.77 (t,  $J = 7.2$  Hz, 3H);  $^{13}\text{C}$  NMR (100 MHz,  $\text{CDCl}_3$ ):  $\delta$  211.2, 147.7, 130.8, 129.9, 129.7, 127.4, 126.7, 126.1, 125.4, 125.0, 121.8, 88.1, 75.6, 50.3, 31.1, 30.2, 26.2, 25.3, 22.4, 13.9; IR (KBr) $\nu_{\max}$  3121, 3073, 2953, 2929, 2856, 1945, 1619, 1554, 1443, 1314, 1219  $\text{cm}^{-1}$ ; Anal. calcd for  $\text{C}_{26}\text{H}_{27}\text{N}_3$ : C, 81.85; H, 7.13; N, 11.01. found C, 81.74; H, 7.05; N, 10.94.

**1-allyl-4-((10-(propa-1,2-dien-1-yl)anthracen-9-yl)methyl)-1H-1,2,3-triazole (8h):** Yield = 0.276 g, 82%, yellow solid, mp 164-165 °C,  $^1\text{H}$  NMR (400 MHz,  $\text{CDCl}_3$ ):  $\delta$  8.46-8.44 (m, 2H), 8.30-8.27 (m, 2H), 7.51-7.44 (m, 4H), 6.95 (t,  $J = 7.2$  Hz, 1H), 6.71 (s, 1H), 5.83-5.74 (m, 1H), 5.14 (d,  $J = 10.4$  Hz, 2H), 5.06-5.02 (m, 4H), 4.72 (d,  $J = 6.0$  Hz, 2H);  $^{13}\text{C}$  NMR (100 MHz,  $\text{CDCl}_3$ ):  $\delta$  211.2, 148.0, 131.3, 130.7, 129.9, 129.6, 127.4, 126.7, 126.1, 125.4, 124.9, 121.7, 120.1, 88.1, 75.6, 52.8, 25.3; IR (KBr) $\nu_{\max}$  3122, 3069, 2926, 2853, 1952, 1618, 1443, 1383, 1220, 1137  $\text{cm}^{-1}$ ; Anal. calcd for  $\text{C}_{23}\text{H}_{19}\text{N}_3$ : C, 81.87; H, 5.68; N, 12.45. found C, 81.76; H, 5.60; N, 12.36. Chemical Formula:  $\text{C}_{23}\text{H}_{19}\text{N}_3$

**Ethyl 2-(4-((10-(propa-1,2-dien-1-yl)anthracen-9-yl)methyl)-1H-1,2,3-triazol-1-yl)acetate (8i):** Yield = 0.299 g, 78%, yellow solid, mp 159-160 °C,  $^1\text{H}$  NMR (400 MHz,  $\text{CDCl}_3$ ):  $\delta$  8.45-8.43 (m, 2H), 8.31-8.28 (m, 2H), 7.52-7.47 (m, 4H), 6.95 (t,  $J = 7.2$  Hz, 1H), 6.85 (s, 1H), 5.09 (s, 2H), 5.05 (d,  $J = 6.8$  Hz, 2H), 4.88 (s, 2H), 4.11 (q,  $J = 8.0$  Hz, 2H), 1.14 (t,  $J = 7.2$  Hz, 3H);  $^{13}\text{C}$  NMR (100 MHz,  $\text{CDCl}_3$ ):  $\delta$  211.2, 166.2, 148.1, 130.5, 129.9, 129.6, 127.4, 126.7, 126.1, 125.4, 124.9, 123.3, 88.1, 75.6, 62.3, 50.8, 25.1, 14.0; IR (KBr) $\nu_{\max}$  3132, 3080, 2990, 2961, 1938, 1756, 1620, 1546, 1445, 1375, 1217  $\text{cm}^{-1}$ ; Anal. calcd for  $\text{C}_{24}\text{H}_{21}\text{N}_3\text{O}_2$ : C, 75.18; H, 5.52; N, 10.96. found C, 75.05; H, 5.44; N, 10.87.

**1-phenyl-2-(4-((10-(propa-1,2-dien-1-yl)anthracen-9-yl)methyl)-1H-1,2,3-triazol-1-yl)ethanone (8j):** Yield = 0.324 g, 78%, yellow solid, mp 181-182 °C,  $^1\text{H}$  NMR (400 MHz,  $\text{CDCl}_3$ ):  $\delta$  8.38 (d,  $J = 8.8$  Hz, 2H), 8.28 (d,  $J = 8.4$  Hz, 2H), 7.76 (d,  $J = 8.0$  Hz, 2H), 7.52 (t,  $J = 7.6$  Hz, 2H), 7.48-7.40 (m, 3H), 7.37 (t,  $J = 7.2$  Hz, 2H), 6.89-6.85 (m, 2H), 5.49 (s, 2H), 5.04 (s, 2H), 4.98 (d,  $J = 6.8$  Hz, 2H);  $^{13}\text{C}$  NMR (100 MHz,  $\text{CDCl}_3$ ):  $\delta$  211.2, 190.4, 134.5, 133.9, 130.6, 129.9, 129.6, 129.2, 128.1, 127.4, 126.6, 126.2, 125.4,

124.9, 123.8, 88.1, 75.6, 55.4, 25.2; IR (KBr) $\nu_{\max}$  3134, 3067, 2963, 2923, 2853, 1948, 1705, 1597, 1448, 1412, 1349, 1261, 1226  $\text{cm}^{-1}$ ; Anal. calcd for  $\text{C}_{28}\text{H}_{21}\text{N}_3\text{O}$ : C, 80.94; H, 5.09; N, 10.11. found C, 80.82; H, 4.98; N, 10.04.

**10,10-bis((1-benzyl-1H-1,2,3-triazol-4-yl)methyl)anthracen-9(10H)-one (9a):** Yield = 0.472 g, 88%, white solid, mp 195-196 °C,  $^1\text{H}$  NMR (400 MHz,  $\text{CDCl}_3$ ):  $\delta$  8.05 (d,  $J$  = 7.6 Hz, 2H), 7.88 (d,  $J$  = 8.0 Hz, 2H), 7.65 (d,  $J$  = 8.0 Hz, 2H), 7.34-7.25 (m, 8H), 6.76 (d,  $J$  = 6.0 Hz, 4H), 5.79 (s, 2H), 5.12 (s, 4H), 3.84 (s, 4H);  $^{13}\text{C}$  NMR (100 MHz,  $\text{CDCl}_3$ ):  $\delta$  182.6, 144.9, 143.2, 134.5, 133.9, 132.3, 129.0, 128.5, 127.4, 127.3, 127.2, 121.5, 53.6, 47.1, 40.8; IR (KBr) $\nu_{\max}$  3164, 3133, 3062, 3032, 2961, 1664, 1602, 1545, 1496, 1455, 1323, 1216  $\text{cm}^{-1}$ ; Anal. calcd for  $\text{C}_{34}\text{H}_{28}\text{N}_6\text{O}$ : C, 76.10; H, 5.26; N, 15.66. found C, 75.98; H, 5.18; N, 15.56.

**10,10-bis((1-(4-nitrobenzyl)-1H-1,2,3-triazol-4-yl)methyl)anthracen-9(10H)-one (9b):** Yield = 0.533 g, 85%, white solid, mp 181-182 °C,  $^1\text{H}$  NMR (400 MHz,  $\text{CDCl}_3$ ):  $\delta$  7.98 (d,  $J$  = 8.8 Hz, 4H), 7.90 (d,  $J$  = 8.0 Hz, 2H), 7.84 (d,  $J$  = 8.0 Hz, 2H), 7.62-7.58 (m, 2H), 7.26-7.22 (m, 2H), 6.71 (d,  $J$  = 8.8 Hz, 4H), 5.84 (s, 2H), 5.13 (s, 4H), 3.77 (s, 4H);  $^{13}\text{C}$  NMR (100 MHz,  $\text{CDCl}_3$ ):  $\delta$  181.3, 146.3, 144.1, 142.2, 141.7, 132.9, 130.9, 126.7, 126.2, 125.5, 122.7, 121.3, 50.9, 46.1, 39.4; IR (KBr) $\nu_{\max}$  3136, 3070, 2956, 2931, 2857, 1661, 1601, 1523, 1493, 1455, 1419, 1357, 1324, 1216  $\text{cm}^{-1}$ .

**10,10-bis((1-(4-methoxybenzyl)-1H-1,2,3-triazol-4-yl)methyl)anthracen-9(10H)-one (9c):** Yield = 0.489 g, 82%, white solid, mp 167-168 °C,  $^1\text{H}$  NMR (400 MHz,  $\text{CDCl}_3$ ):  $\delta$  8.01 (d,  $J$  = 7.6 Hz, 2H), 7.84 (d,  $J$  = 8.0 Hz, 2H), 7.61 (t,  $J$  = 8.0 Hz, 2H), 7.29 (t,  $J$  = 7.6 Hz, 2H), 6.77-6.69 (m, 8H), 5.70 (s, 2H), 5.01 (s, 4H), 3.80 (s, 6H), 3.78 (s, 4H);  $^{13}\text{C}$  NMR (100 MHz,  $\text{CDCl}_3$ ):  $\delta$  182.6, 159.8, 145.0, 143.1, 133.9, 132.4, 129.0, 127.4, 127.3, 126.6, 121.3, 114.4, 55.5, 53.3, 47.1, 40.9; IR (KBr) $\nu_{\max}$  3129, 3066, 2960, 2933, 2833, 1663, 1602, 1515, 1324, 1255, 1217  $\text{cm}^{-1}$ ; Anal. calcd for  $\text{C}_{36}\text{H}_{32}\text{N}_6\text{O}_3$ : C, 72.47; H, 5.41; N, 14.08. found C, 72.35; H, 5.30; N, 13.98.

**10,10-bis((1-(4-methylbenzyl)-1H-1,2,3-triazol-4-yl)methyl)anthracen-9(10H)-one (9d):** Yield = 0.485 g, 88%, white solid, mp 215-216 °C,  $^1\text{H}$  NMR (400 MHz,  $\text{CDCl}_3$ ):  $\delta$  8.06 (d,  $J$  = 8.0 Hz, 2H), 7.87 (d,  $J$  = 8.0 Hz, 2H), 7.64 (t,  $J$  = 7.6 Hz, 2H), 7.32 (t,  $J$  = 7.6 Hz, 2H), 7.07 (d,  $J$  = 7.6 Hz, 4H), 6.68 (d,  $J$  = 7.6 Hz, 4H), 5.78 (s, 2H), 5.07 (s, 4H), 3.83 (s, 4H), 2.35 (s, 6H);  $^{13}\text{C}$  NMR (100 MHz,  $\text{CDCl}_3$ ):  $\delta$  182.6, 144.9, 143.1, 138.3, 133.9, 132.2, 131.5, 129.6, 127.4, 127.2, 121.4, 53.4, 47.0, 40.8, 21.2; IR (KBr) $\nu_{\max}$  3132,

3062, 3025, 2959, 2922, 1666, 1602, 1516, 1458, 1323, 1217  $\text{cm}^{-1}$ ; Anal. calcd for  $\text{C}_{36}\text{H}_{32}\text{N}_6\text{O}$ : C, 76.57; H, 5.71; N, 14.88. found C, 76.45; H, 5.60; N, 14.77.

**10,10-bis((1-(4-bromobenzyl)-1H-1,2,3-triazol-4-yl)methyl)anthracen-9(10H)-one (9e):** Yield = 0.588 g, 85%, white solid, mp 205-206 °C,  $^1\text{H}$  NMR (400 MHz,  $\text{CDCl}_3$ ):  $\delta$  8.05 (d,  $J$  = 8.0 Hz, 2H), 7.92 (d,  $J$  = 8.0 Hz, 2H), 7.67 (t,  $J$  = 7.2 Hz, 2H), 7.41 (d,  $J$  = 8.4 Hz, 4H), 7.34 (t,  $J$  = 7.6 Hz, 2H), 6.63 (d,  $J$  = 8.4 Hz, 4H), 5.78 (s, 2H), 5.07 (s, 4H), 3.87 (s, 4H);  $^{13}\text{C}$  NMR (100 MHz,  $\text{CDCl}_3$ ):  $\delta$  182.6, 144.8, 134.1, 133.5, 132.2, 129.7, 128.9, 127.5, 127.3, 127.2, 122.6, 121.6, 52.9, 47.1, 40.7; IR (KBr) $\nu_{\text{max}}$  3123, 3065, 2954, 2929, 1651, 1598, 1489, 1458, 1408, 1325, 1176  $\text{cm}^{-1}$ ; Anal. calcd for  $\text{C}_{34}\text{H}_{26}\text{Br}_2\text{N}_6\text{O}$ : C, 58.81; H, 3.77; N, 12.10. found C, 58.70; H, 3.69; N, 11.98.

**10,10-bis((1-(4-fluorobenzyl)-1H-1,2,3-triazol-4-yl)methyl)anthracen-9(10H)-one (9f):** Yield = 0.492 g, 86%, white solid, mp 194-195 °C,  $^1\text{H}$  NMR (400 MHz,  $\text{CDCl}_3$ ):  $\delta$  8.05 (d,  $J$  = 7.6 Hz, 2H), 7.89 (d,  $J$  = 8.0 Hz, 2H), 7.67 (t,  $J$  = 8.0 Hz, 2H), 7.34 (t,  $J$  = 7.2 Hz, 2H), 6.98-6.94 (m, 4H), 6.76-6.73 (m, 4H), 5.77 (s, 2H), 5.09 (s, 4H), 3.84 (s, 4H);  $^{13}\text{C}$  NMR (100 MHz,  $\text{CDCl}_3$ ):  $\delta$  182.5, 163.9, 144.9, 134.0, 132.2, 130.4, 129.2, 129.1, 127.5, 127.2, 127.1, 121.3, 116.1, 115.8, 52.8, 47.1, 40.8; IR (KBr) $\nu_{\text{max}}$  3133, 3067, 2965, 1665, 1603, 1514, 1457, 1323, 1237, 1161  $\text{cm}^{-1}$ ; Anal. calcd for  $\text{C}_{34}\text{H}_{26}\text{F}_2\text{N}_6\text{O}$ : C, 71.32; H, 4.58; N, 14.68. found C, 71.22; H, 4.50; N, 14.59.

**10,10-bis((1-propyl-1H-1,2,3-triazol-4-yl)methyl)anthracen-9(10H)-one (9g):** Yield = 0.330 g, 75%, white solid, mp 188-189 °C,  $^1\text{H}$  NMR (400 MHz,  $\text{CDCl}_3$ ):  $\delta$  8.14 (d,  $J$  = 8.0 Hz, 2H), 7.93 (d,  $J$  = 8.0 Hz, 2H), 7.72 (t,  $J$  = 7.6 Hz, 2H), 7.41 (t,  $J$  = 7.6 Hz, 2H), 5.86 (s, 2H), 3.91-3.82 (m, 8H), 1.53-1.46 (m, 4H), 0.57 (t,  $J$  = 7.2 Hz, 6H);  $^{13}\text{C}$  NMR (100 MHz,  $\text{CDCl}_3$ ):  $\delta$  182.9, 145.2, 142.8, 134.1, 132.5, 127.6, 127.3, 127.2, 121.1, 51.6, 46.9, 40.9, 23.5, 10.7; IR (KBr) $\nu_{\text{max}}$  3133, 3063, 2965, 2934, 2876, 1666, 1602, 1457, 1385, 1352, 1323, 1215  $\text{cm}^{-1}$ ; Anal. calcd for  $\text{C}_{26}\text{H}_{28}\text{N}_6\text{O}$ : C, 70.89; H, 4.41; N, 19.08. found C, 70.77; H, 4.35; N, 18.97.

**10,10-bis((1-butyl-1H-1,2,3-triazol-4-yl)methyl)anthracen-9(10H)-one (9h):** Yield = 0.351 g, 75%, white solid, mp 176-177 °C,  $^1\text{H}$  NMR (400 MHz,  $\text{CDCl}_3$ ):  $\delta$  8.18 (d,  $J$  = 8.0 Hz, 2H), 7.96 (d,  $J$  = 8.4 Hz, 2H), 7.76 (t,  $J$  = 8.4 Hz, 2H), 7.44 (t,  $J$  = 7.2 Hz, 2H), 5.89 (s, 2H), 3.94 (t,  $J$  = 7.2 Hz, 4H), 3.88 (s, 4H), 1.52-1.45 (m, 4H), 0.98-0.88 (m, 4H), 0.77 (t,  $J$  = 7.6 Hz, 6H);  $^{13}\text{C}$  NMR (100 MHz,  $\text{CDCl}_3$ ):  $\delta$  182.9, 145.2, 142.8, 134.1, 132.5, 127.6, 127.3, 127.2, 121.1, 49.7, 46.9, 40.9, 32.0, 19.4, 13.4; IR (KBr) $\nu_{\text{max}}$

3129, 3071, 2957, 2928, 2856, 1666, 1603, 1461, 1324, 1215 $\text{cm}^{-1}$ ; Anal. calcd for  $\text{C}_{28}\text{H}_{32}\text{N}_6\text{O}$ : C, 71.77; H, 6.88; N, 17.93. found C, 71.65; H, 6.79; N, 17.83.

**10,10-bis((1-(sec-butyl)-1H-1,2,3-triazol-4-yl)methyl)anthracen-9(10H)-one (9i):** Yield = 0.365 g, 78%, white solid, mp 149-150 °C,  $^1\text{H}$  NMR (400 MHz,  $\text{CDCl}_3$ ):  $\delta$  8.11 (d,  $J = 7.6$  Hz, 2H), 7.92 (d,  $J = 8.4$  Hz, 2H), 7.70 (t,  $J = 7.2$  Hz, 2H), 7.38 (t,  $J = 7.6$  Hz, 2H), 5.83 (s, 2H), 4.11 (q,  $J = 7.6$  Hz, 2H), 3.84 (s, 4H), 1.49-1.36 (m, 4H), 1.14 (d,  $J = 6.8$  Hz, 6H), 0.40 (t,  $J = 7.2$  Hz, 6H);  $^{13}\text{C}$  NMR (100 MHz,  $\text{CDCl}_3$ ):  $\delta$  182.8, 145.3, 142.6, 134.0, 132.5, 127.5, 127.4, 127.1, 119.1, 58.4, 47.1, 40.8, 30.1, 20.6, 10.0; IR (KBr) $\nu_{\text{max}}$  3137, 3067, 3036, 2963, 2935, 2875, 1666, 1603, 1479, 1459, 1351, 1326, 1217  $\text{cm}^{-1}$ ; Anal. calcd for  $\text{C}_{28}\text{H}_{32}\text{N}_6\text{O}$ : C, 71.77; H, 6.88; N, 17.93. found C, 71.64; H, 6.78; N, 17.82.

**10,10-bis((1-hexyl-1H-1,2,3-triazol-4-yl)methyl)anthracen-9(10H)-one (9j):** Yield = 0.330 g, 75%, white solid, mp 162-163 °C,  $^1\text{H}$  NMR (400 MHz,  $\text{CDCl}_3$ ):  $\delta$  8.15 (d,  $J = 8.0$  Hz, 2H), 7.92 (d,  $J = 7.6$  Hz, 2H), 7.71 (t,  $J = 8.0$  Hz, 2H), 7.41 (t,  $J = 8.0$  Hz, 2H), 5.86 (s, 2H), 3.90 (t,  $J = 7.2$  Hz, 4H), 3.85 (s, 4H), 1.50-1.43 (m, 4H), 1.19-1.06 (m, 8H), 0.94-0.86 (m, 4H), 0.81 (t,  $J = 7.2$  Hz, 6H);  $^{13}\text{C}$  NMR (100 MHz,  $\text{CDCl}_3$ ):  $\delta$  182.9, 145.3, 142.8, 134.1, 132.6, 127.6, 127.3, 121.1, 50.0, 46.9, 41.1, 31.1, 30.1, 25.9, 22.5, 14.1; IR (KBr) $\nu_{\text{max}}$  3132, 3061, 2953, 2931, 2860, 1668, 1603, 1459, 1383, 1323, 1213  $\text{cm}^{-1}$ ; Anal. calcd for  $\text{C}_{32}\text{H}_{40}\text{N}_6\text{O}$ : C, 70.25; H, 7.68; N, 16.02. found C, 70.11; H, 7.59; N, 15.91.

**10,10-bis((1-allyl-1H-1,2,3-triazol-4-yl)methyl)anthracen-9(10H)-one (9k):** Yield = 0.348 g, 80%, white solid, mp 179-180 °C,  $^1\text{H}$  NMR (400 MHz,  $\text{CDCl}_3$ ):  $\delta$  8.17 (d,  $J = 8.0$  Hz, 2H), 7.95 (d,  $J = 8.0$  Hz, 2H), 7.75 (t,  $J = 8.0$  Hz, 2H), 7.44 (t,  $J = 8.0$  Hz, 2H), 5.92 (s, 2H), 5.69-5.62 (m, 2H), 5.11 (d,  $J = 10.4$  Hz, 2H), 4.77 (d,  $J = 17.2$  Hz, 2H), 4.57 (d,  $J = 6.0$  Hz, 4H), 3.88 (s, 4H);  $^{13}\text{C}$  NMR (100 MHz,  $\text{CDCl}_3$ ):  $\delta$  182.9, 144.9, 142.9, 134.0, 132.4, 131.1, 127.5, 127.2, 121.3, 119.1, 52.1, 46.9, 40.8; IR (KBr) $\nu_{\text{max}}$  3135, 3066, 2959, 2916, 2823, 1665, 1601, 1458, 1323, 1217  $\text{cm}^{-1}$ ; Anal. calcd for  $\text{C}_{26}\text{H}_{24}\text{N}_6\text{O}$ : C, 71.54; H, 5.54; N, 19.25. found C, 71.43; H, 5.45; N, 19.13.

**diethyl2,2'-(4,4'-((10-oxo-9,10-dihydroanthracene-9,9-diyl)bis(methylene))bis(1H-1,2,3-triazole-4,1-diyl))diacetate (9l):** Yield = 0.423 g, 80%, white solid, mp 153-154 °C,  $^1\text{H}$  NMR (400 MHz,  $\text{CDCl}_3$ ):  $\delta$  8.14 (d,  $J = 8.0$  Hz, 2H), 7.94 (t,  $J = 8.0$  Hz, 2H), 7.73 (t,  $J = 8.0$  Hz, 2H), 7.40 (t,  $J = 7.6$  Hz, 2H), 6.06 (s, 2H), 4.72 (s, 4H), 4.07 (q,  $J = 6.8$  Hz, 4H), 3.88 (s, 4H), 1.13 (t,  $J = 7.2$  Hz, 6H);  $^{13}\text{C}$  NMR (100 MHz,  $\text{CDCl}_3$ ):  $\delta$  182.8, 165.9, 144.9, 143.1, 133.9, 132.3, 127.5, 127.3, 122.7, 62.2, 50.6, 46.7, 40.7, 13.9; IR

(KBr) $\nu_{\max}$  3170, 3138, 2987, 2939, 2845, 2861, 1755, 1666, 1603, 1459, 1354, 1324, 1263, 1231  $\text{cm}^{-1}$ ;  
Anal. calcd for  $\text{C}_{28}\text{H}_{28}\text{N}_6\text{O}_5$ : C, 63.63; H, 5.34; N, 15.90. found C, 63.50; H, 5.25; N, 15.78.

**10-((1-(4-nitrobenzyl)-1H-1,2,3-triazol-4-yl)methyl)-10-(prop-2-yn-1-yl)anthracen-9(10H)-one (10):**

Yield = 0.340 g, 76%, white solid, mp 183-184 °C,  $^1\text{H}$  NMR (400 MHz,  $\text{CDCl}_3$ ):  $\delta$  8.23 (d,  $J$  = 8.4 Hz, 2H), 8.12 (d,  $J$  = 8.8 Hz, 2H), 7.79 (d,  $J$  = 8.0 Hz, 2H), 7.68 (t,  $J$  = 8.0 Hz, 2H), 7.43 (t,  $J$  = 8.0 Hz, 2H), 6.85 (d,  $J$  = 8.8 Hz, 2H), 5.87 (s, 1H), 5.23 (s, 2H), 3.73 (s, 2H), 3.21 (d,  $J$  = 2.4 Hz, 2H), 1.63 (t,  $J$  = 2.4 Hz, 1H);  $^{13}\text{C}$  NMR (100 MHz,  $\text{CDCl}_3$ ):  $\delta$  183.2, 148.0, 144.8, 143.9, 141.8, 134.0, 132.5, 127.9, 127.8, 127.5, 126.7, 124.3, 121.8, 79.4, 71.8, 52.7, 46.1, 39.9, 34.6; IR (KBr) $\nu_{\max}$  3287, 3139, 3073, 2926, 2852, 2301, 1657, 1602, 1517, 1460, 1348, 1324, 1224  $\text{cm}^{-1}$ ; Anal. calcd for  $\text{C}_{27}\text{H}_{20}\text{N}_4\text{O}_3$ : C, 72.31; H, 4.49; N, 12.49. found C, 72.18; H, 4.39; N, 12.37.

**10-((1-(3-bromopropyl)-1H-1,2,3-triazol-4-yl)methyl)-10-(prop-2-yn-1-yl)anthracen-9(10H)-one (11):**

Yield = 0.282 g, 65%, semi-solid,  $^1\text{H}$  NMR (400 MHz,  $\text{CDCl}_3$ ):  $\delta$  8.31 (d,  $J$  = 7.6 Hz, 2H), 7.82 (d,  $J$  = 8.0 Hz, 2H), 7.73 (t,  $J$  = 8.0 Hz, 2H), 7.49 (t,  $J$  = 7.6 Hz, 2H), 5.94 (s, 1H), 4.04 (t,  $J$  = 6.8 Hz, 2H), 3.73 (s, 2H), 3.23 (d,  $J$  = 2.8 Hz, 2H), 2.96 (t,  $J$  = 6.4 Hz, 2H), 1.84-1.77 (m, 2H), 1.65 (t,  $J$  = 2.4 Hz, 1H);  $^{13}\text{C}$  NMR (100 MHz,  $\text{CDCl}_3$ ):  $\delta$  183.3, 144.8, 142.9, 133.9, 132.5, 127.7, 127.5, 127.4, 126.5, 122.1, 121.7, 79.5, 71.6, 47.6, 46.7, 46.1, 39.7, 34.5, 32.3; IR (KBr) $\nu_{\max}$  3294, 3068, 2925, 2853, 2101, 1654, 1599, 1458, 1324, 1218, 1176  $\text{cm}^{-1}$ ; Anal. calcd for  $\text{C}_{23}\text{H}_{20}\text{BrN}_3\text{O}$ : C, 63.60; H, 4.64; N, 9.67. found C, 63.48; H, 4.55; N, 9.56.

**10,10-bis((1-benzyl-1H-1,2,3-triazol-4-yl)methyl)-9,10-dihydroanthracen-9-ol (12a):**

Yield = 0.452 g, 84%, white solid, mp 159-160 °C,  $^1\text{H}$  NMR (400 MHz,  $\text{CDCl}_3$ ):  $\delta$  7.56 (d,  $J$  = 7.6 Hz, 2H), 7.34 (d,  $J$  = 7.6 Hz, 2H), 7.31-7.23 (m, 8H), 7.22-7.18 (m, 2H), 6.89 (d,  $J$  = 8.4 Hz, 2H), 6.79 (d,  $J$  = 6.8 Hz, 2H), 6.31 (s, 1H), 5.67 (s, 1H), 5.18 (s, 2H), 5.13 (s, 2H), 5.00 (s, 1H), 4.98 (s, 1H), 3.69 (s, 2H), 3.67 (s, 2H);  $^{13}\text{C}$  NMR (100 MHz,  $\text{CDCl}_3$ ):  $\delta$  144.6, 144.3, 138.4, 137.9, 135.0, 134.8, 129.0, 128.9, 128.8, 128.4, 127.7, 127.5, 127.1, 126.6, 122.6, 121.7, 67.8, 53.7, 53.6, 46.5, 40.4, 40.3; IR (KBr) $\nu_{\max}$  3532, 3146, 3061, 3035, 2924, 2825, 1601, 1543, 1490, 1415, 1352, 1325, 1220  $\text{cm}^{-1}$ ; Anal. calcd for  $\text{C}_{34}\text{H}_{30}\text{N}_6\text{O}$ : C, 75.81; H, 5.61; N, 15.60. found C, 75.65; H, 5.53; N, 15.48.

**10,10-bis((1-(4-nitrobenzyl)-1H-1,2,3-triazol-4-yl)methyl)-9,10-dihydroanthracen-9-ol (12b):**

Yield = 0.502 g, 80%, white solid, mp 226-227 °C,  $^1\text{H}$  NMR (400 MHz,  $\text{CD}_2\text{Cl}_2$ ):  $\delta$  8.10 (d,  $J$  = 8.4 Hz, 4H), 7.62 (d,  $J$  = 8.0 Hz, 2H), 7.42 (d,  $J$  = 7.6 Hz, 2H), 7.34 (t,  $J$  = 7.2 Hz, 2H), 7.27 (t,  $J$  = 7.2 Hz, 2H), 7.01 (d,  $J$  =

8.4 Hz, 2H), 6.89 (d,  $J = 8.4$  Hz, 2H), 6.56 (s, 1H), 5.89 (s, 1H), 5.33 (s, 2H), 5.25 (s, 2H), 5.13 (s, 1H), 5.12 (s, 1H), 3.73 (s, 4H);  $^{13}\text{C}$  NMR (100 MHz,  $\text{CDCl}_3$ ):  $\delta$  145.8, 145.6, 141.8, 137.7, 136.6, 126.7, 126.6, 126.1, 125.6, 124.9, 124.8, 122.2, 122.1, 121.5, 64.3, 50.3, 44.9, 36.5; IR (KBr) $\nu_{\text{max}}$  3543, 3132, 2962, 2927, 2855, 1603, 1517, 1487, 1421, 1754, 1261, 1218  $\text{cm}^{-1}$ ; Anal. calcd for  $\text{C}_{34}\text{H}_{28}\text{N}_8\text{O}_5$ : C, 63.96; H, 4.49; N, 17.82. found C, 63.83; H, 4.38; N, 18.70.

**10,10-bis((1-propyl-1H-1,2,3-triazol-4-yl)methyl)-9,10-dihydroanthracen-9-ol (12c):** Yield = 0.318 g, 72%, white solid, mp 141-142 °C,  $^1\text{H}$  NMR (400 MHz,  $\text{CDCl}_3$ ):  $\delta$  7.57 (d,  $J = 7.6$  Hz, 2H), 7.51 (d,  $J = 7.6$  Hz, 2H), 7.35-7.31 (m, 2H), 7.28-7.26 (m, 2H), 6.40 (s, 1H), 5.79 (s, 1H), 5.32 (s, 1H), 3.96 (t,  $J = 7.2$  Hz, 2H), 3.90-3.85 (m, 3H), 3.69-3.68 (m, 4H), 1.61 (q,  $J = 7.2$  Hz, 2H), 1.53 (q,  $J = 7.2$  Hz, 2H), 0.69 (t,  $J = 7.2$  Hz, 3H), 0.59 (t,  $J = 7.2$  Hz, 3H);  $^{13}\text{C}$  NMR (100 MHz,  $\text{CDCl}_3$ ):  $\delta$  144.1, 143.9, 138.9, 138.0, 129.0, 128.6, 127.3, 126.8, 122.5, 121.5, 111.9, 68.4, 51.7, 51.5, 46.6, 40.6, 39.8, 23.7; IR (KBr) $\nu_{\text{max}}$  3537, 3132, 2964, 2927, 2875, 1602, 1542, 1490, 1457, 1328, 1261  $\text{cm}^{-1}$ ; Anal. calcd for  $\text{C}_{26}\text{H}_{30}\text{N}_6\text{O}$ : C, 70.56; H, 6.83; N, 18.99. found C, 70.45; H, 6.72; N, 18.88.

**diethyl 2,2'-(4,4'-((10-hydroxy-9,10-dihydroanthracene-9,9-diyl)bis(methylene))bis(1H-1,2,3-triazole-4,1-diyl))diacetate (12d):** Yield = 0.413 g, 78%, white solid, mp: 145-146 °C,  $^1\text{H}$  NMR (400 MHz,  $\text{CDCl}_3$ ):  $\delta$  7.65 (d,  $J = 8.0$  Hz, 2H), 7.50 (d,  $J = 8.0$  Hz, 2H), 7.33 (t,  $J = 7.6$  Hz, 2H), 7.21 (t,  $J = 7.2$  Hz, 2H), 6.17 (s, 1H), 5.95 (s, 1H), 5.20 (s, 1H), 4.72 (s, 2H), 4.70 (s, 2H), 4.68 (s, 1H), 4.08-4.02 (m, 4H), 3.74 (s, 2H), 3.66 (s, 2H), 1.15-1.11 (m, 6H);  $^{13}\text{C}$  NMR (100 MHz,  $\text{CDCl}_3$ ):  $\delta$  166.7, 166.1, 144.1, 138.3, 137.7, 128.7, 128.3, 127.6, 127.1, 126.5, 123.4, 122.9, 66.8, 62.4, 62.2, 50.6, 50.4, 46.6, 40.6, 40.3, 14.0, 13.9; IR (KBr) $\nu_{\text{max}}$  3537, 3143, 2986, 2943, 1746, 1603, 1547, 1489, 1463, 1383, 1221  $\text{cm}^{-1}$ ; Anal. calcd for  $\text{C}_{28}\text{H}_{30}\text{N}_6\text{O}_5$ : C, 63.38; H, 5.70; N, 15.84. found C, 63.25; H, 5.59; N, 15.72.

**4,4'-((10-((1-benzyl-1H-1,2,3-triazol-4-yl)methoxy)-9,10-dihydroanthracene-9,9**

**diyl)bis(methylene))bis(1-benzyl-1H-1,2,3-triazole) (13):** Yield = 0.510 g, 72%, Semi-solid,  $^1\text{H}$  NMR (400 MHz,  $\text{CDCl}_3$ ):  $\delta$  7.50 (d,  $J = 8.0$  Hz, 2H), 7.34-7.32 (m, 5H), 7.27-7.15 (m, 12H), 6.97-6.95 (m, 2H), 6.75 (d,  $J = 7.2$  Hz, 2H), 6.28 (s, 1H), 5.71 (s, 1H), 5.42 (s, 2H), 5.11-5.09 (m, 4H), 5.07 (s, 2H), 3.81 (s, 2H), 3.71 (s, 2H), 3.64 (s, 2H);  $^{13}\text{C}$  NMR (100 MHz,  $\text{CDCl}_3$ ):  $\delta$  145.7, 144.4, 144.2, 140.2, 134.9, 134.7, 134.6, 129.0, 128.8, 128.7, 128.4, 128.3, 128.2, 128.1, 127.8, 127.2, 127.1, 126.8, 122.7, 122.5, 121.8, 74.5, 58.3, 53.9, 53.5, 53.3, 47.1, 40.7, 38.4; IR (KBr) $\nu_{\text{max}}$  3135, 3061, 3031, 2925, 2847, 1603, 1544,

1496, 1453, 1325, 1217  $\text{cm}^{-1}$ ; Anal. calcd for  $\text{C}_{44}\text{H}_{39}\text{N}_9\text{O}$ : C, 74.45; H, 5.54; N, 17.76. found C, 74.32; H, 5.46; N, 17.64.

<sup>1</sup>H NMR spectra of **2**

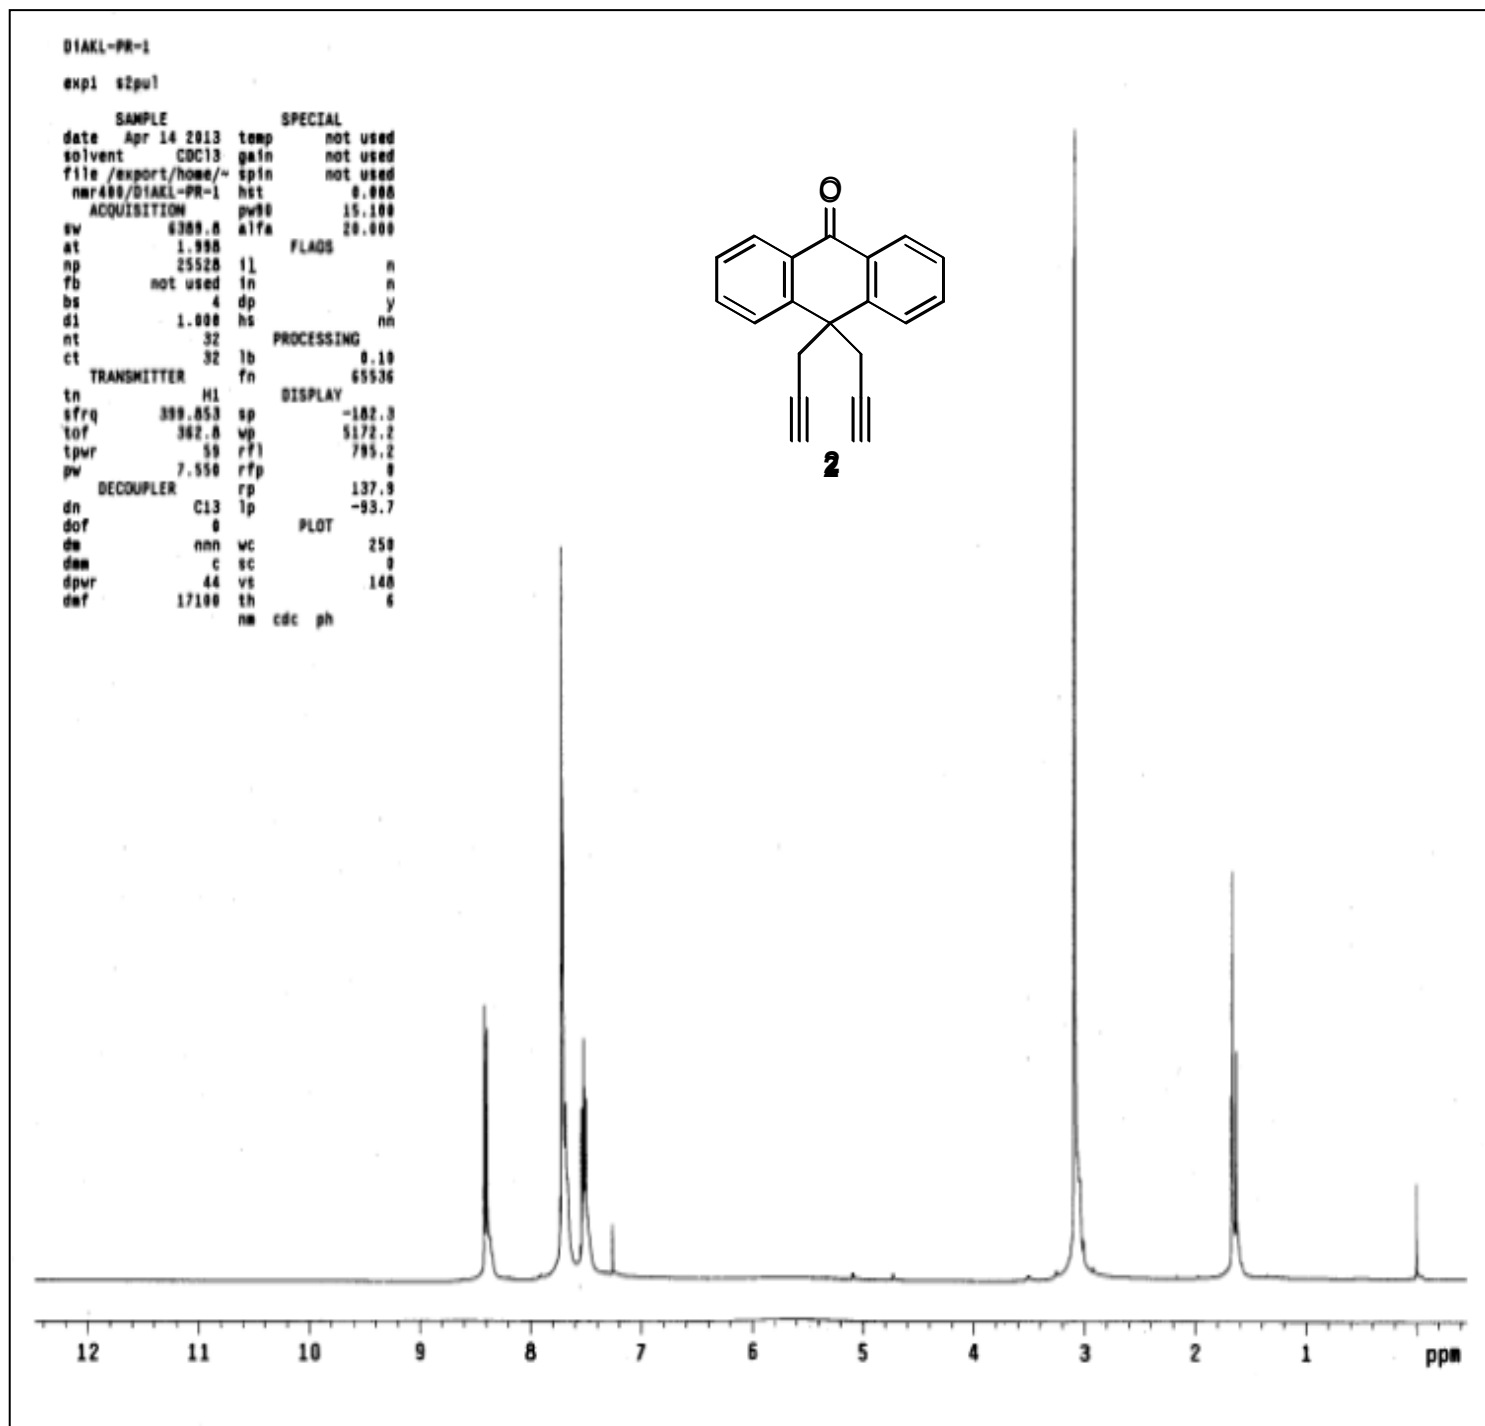



$^{13}\text{C}$  NMR spectra of **2**

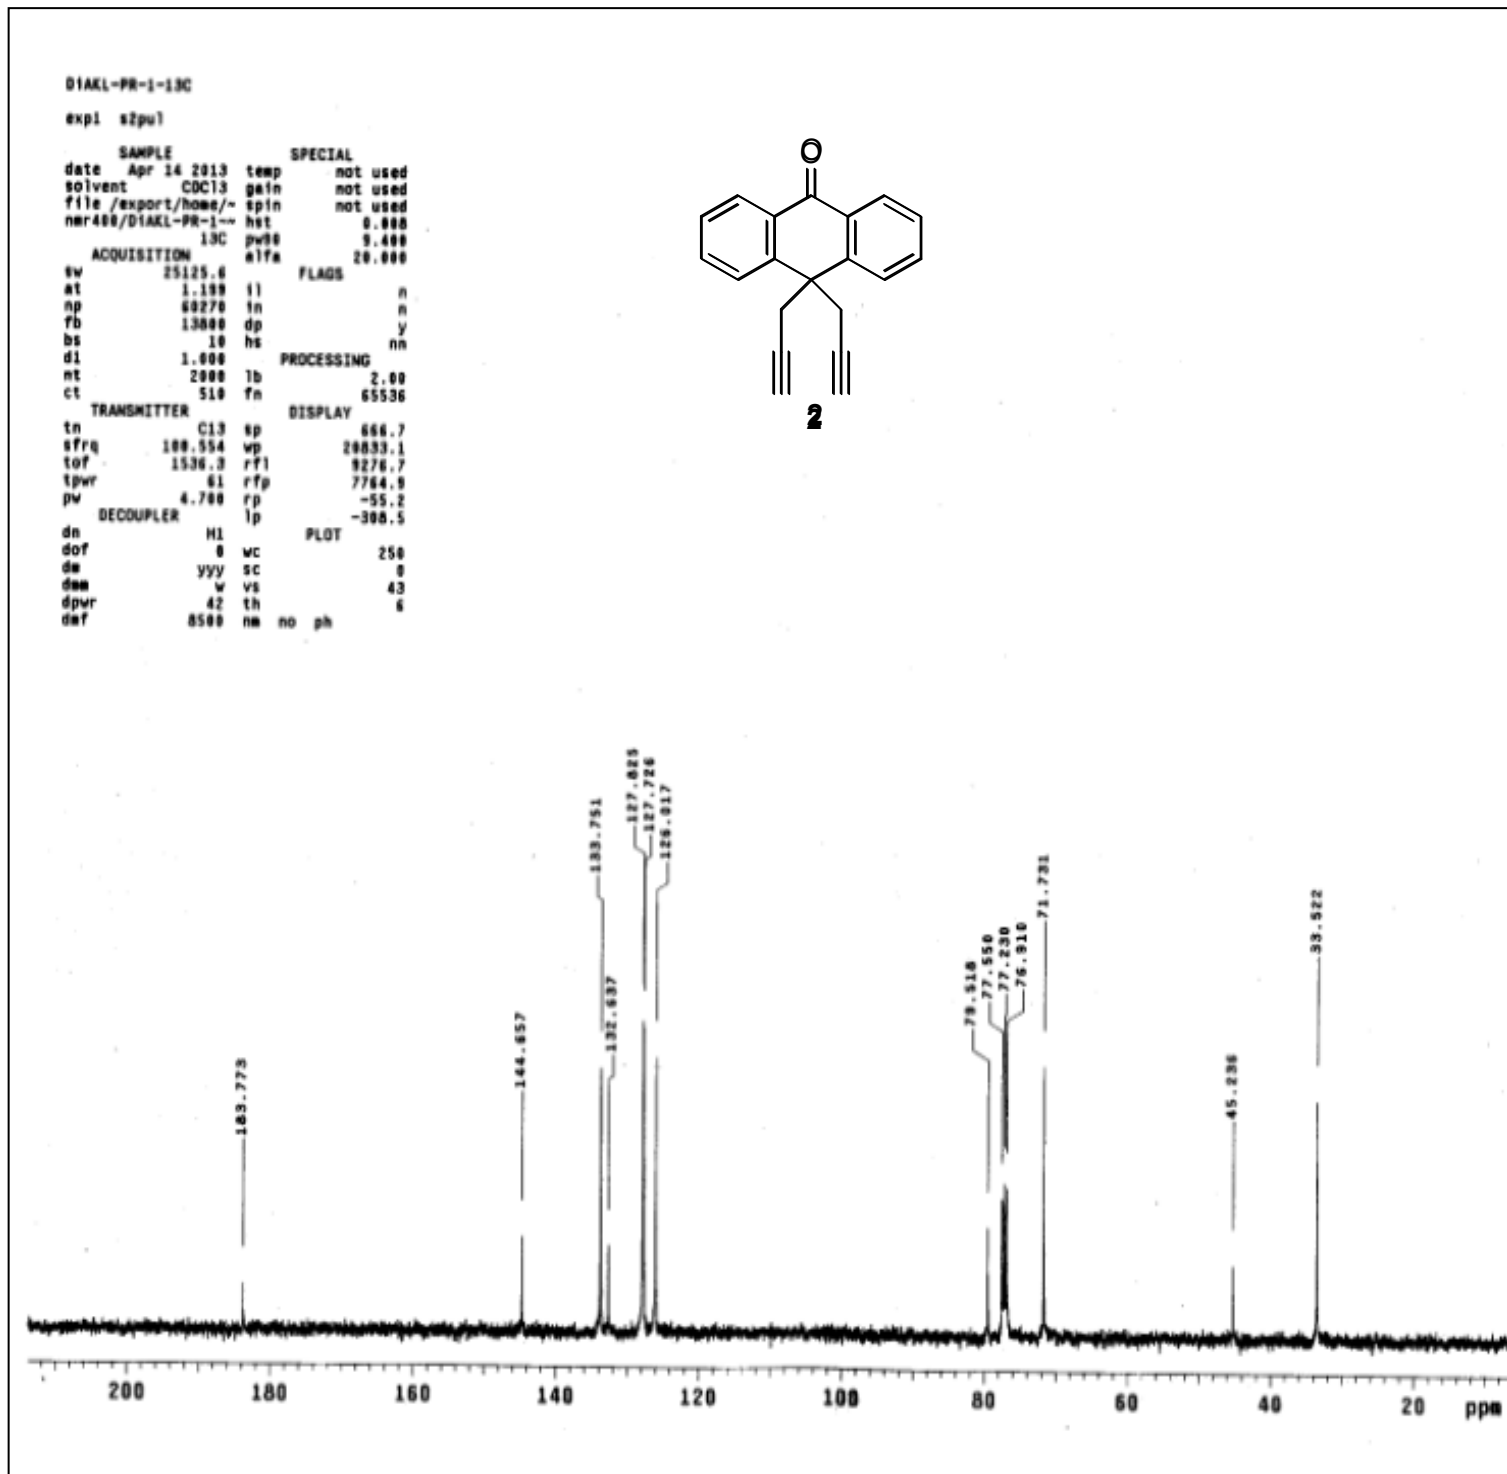

$^1\text{H}$  NMR spectra of **4**

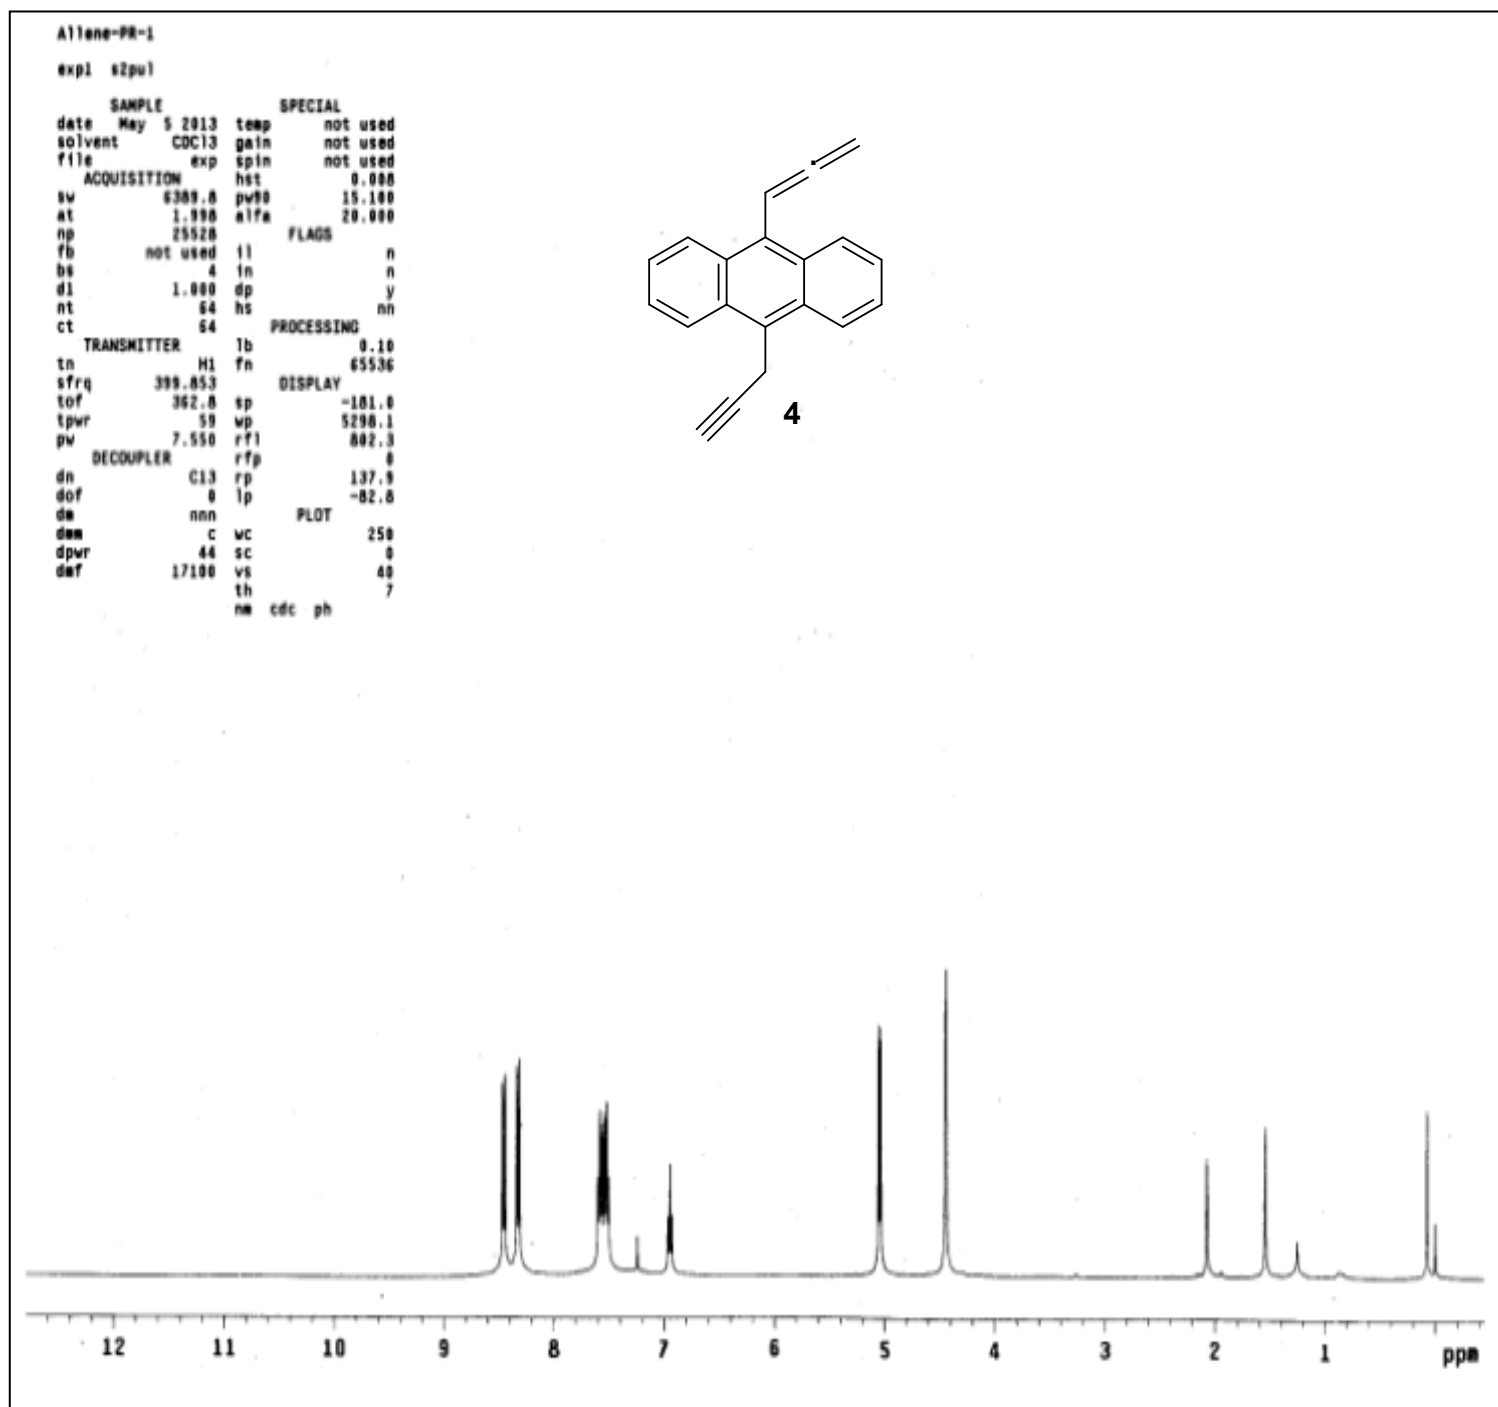

$^{13}\text{C}$  NMR spectra of **4**

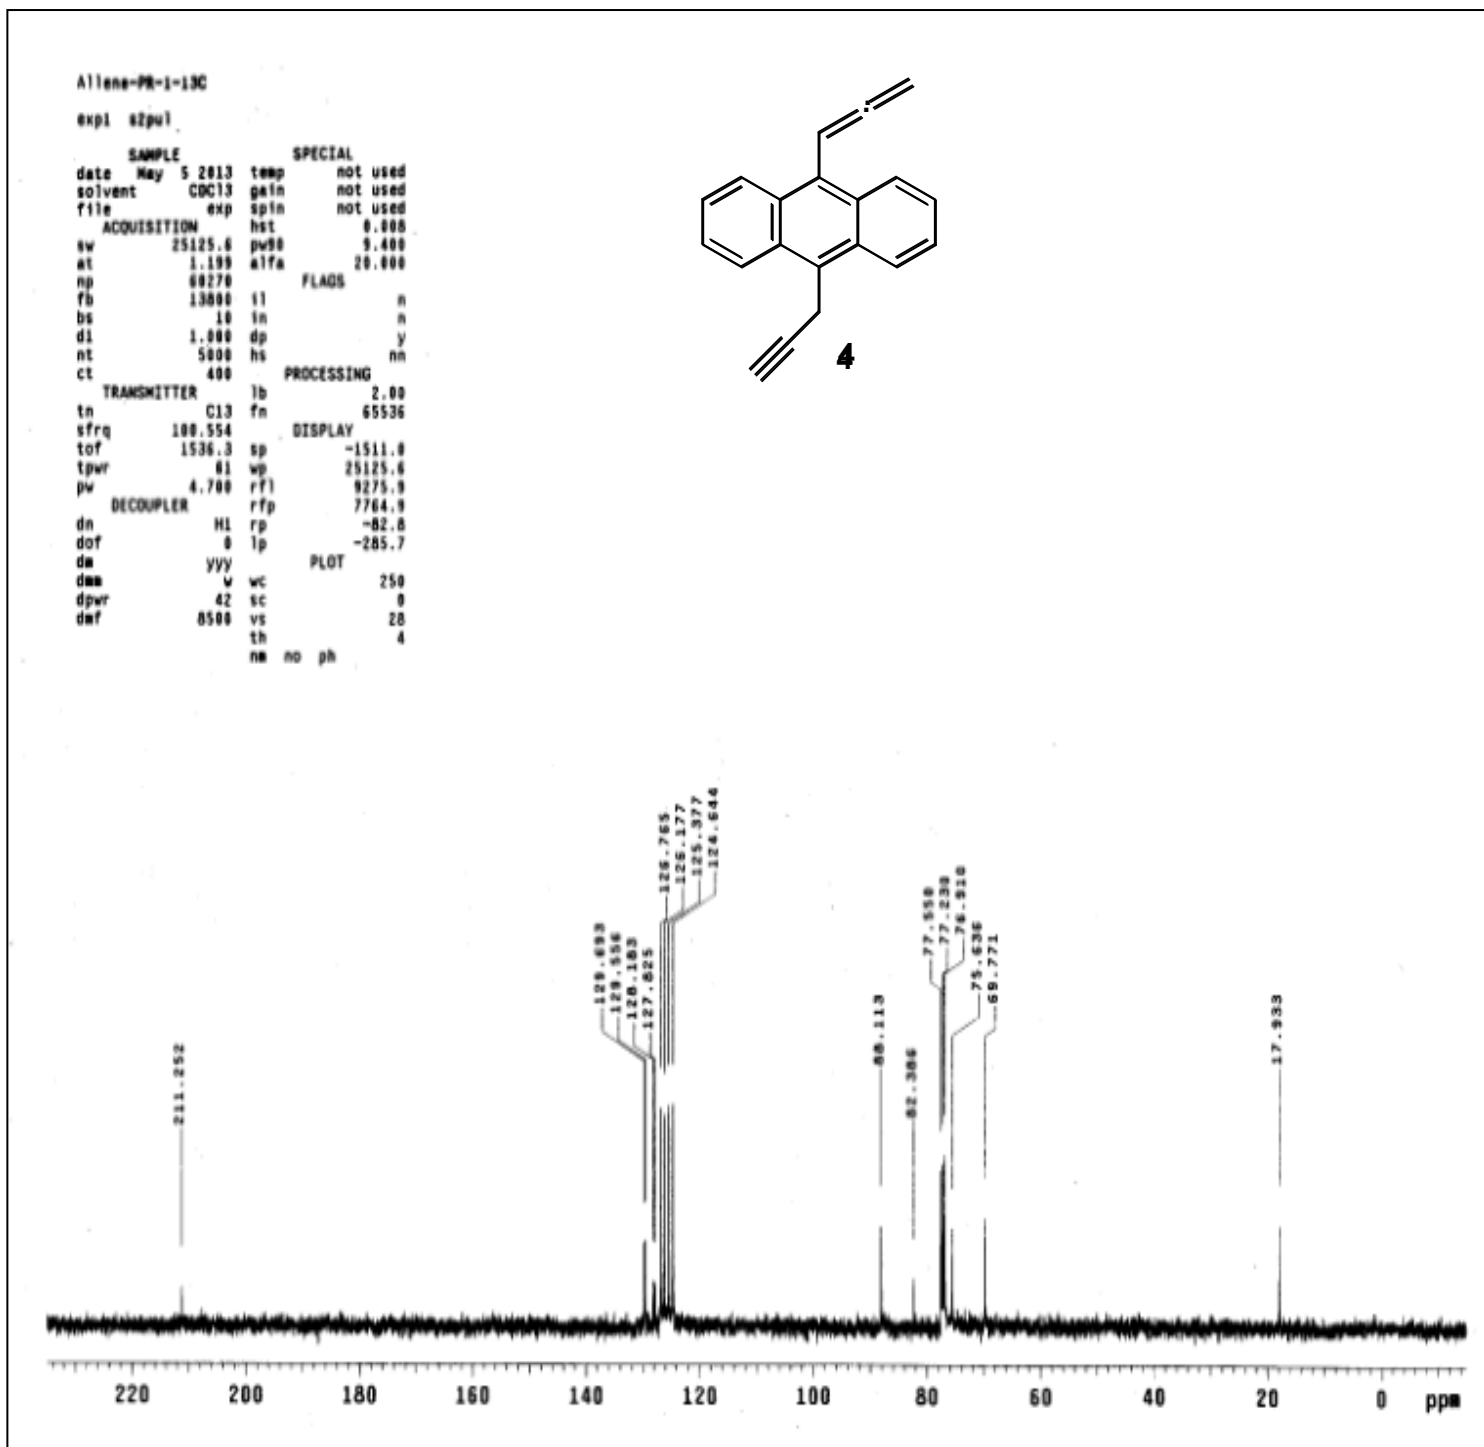

$^1\text{H}$  NMR spectra of **5**

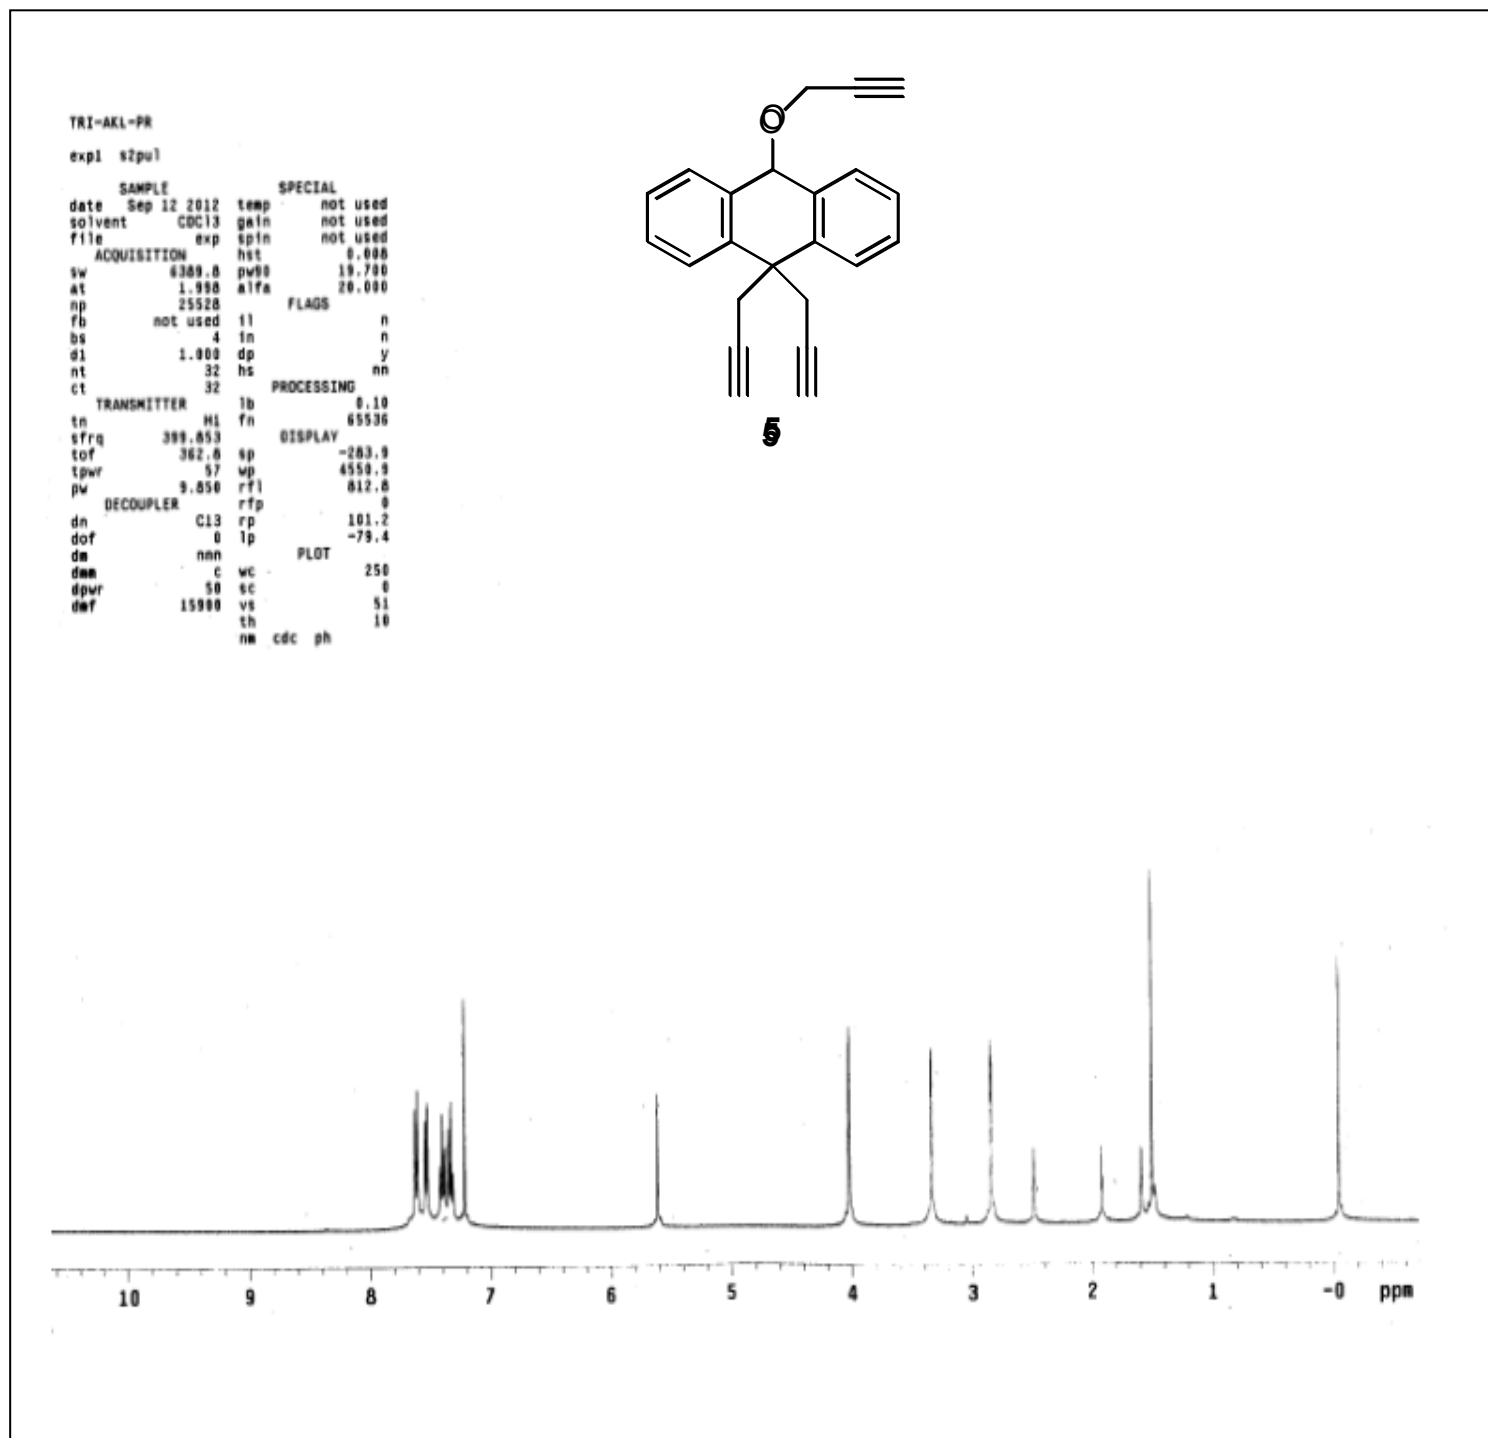

$^{13}\text{C}$  NMR spectra of 5

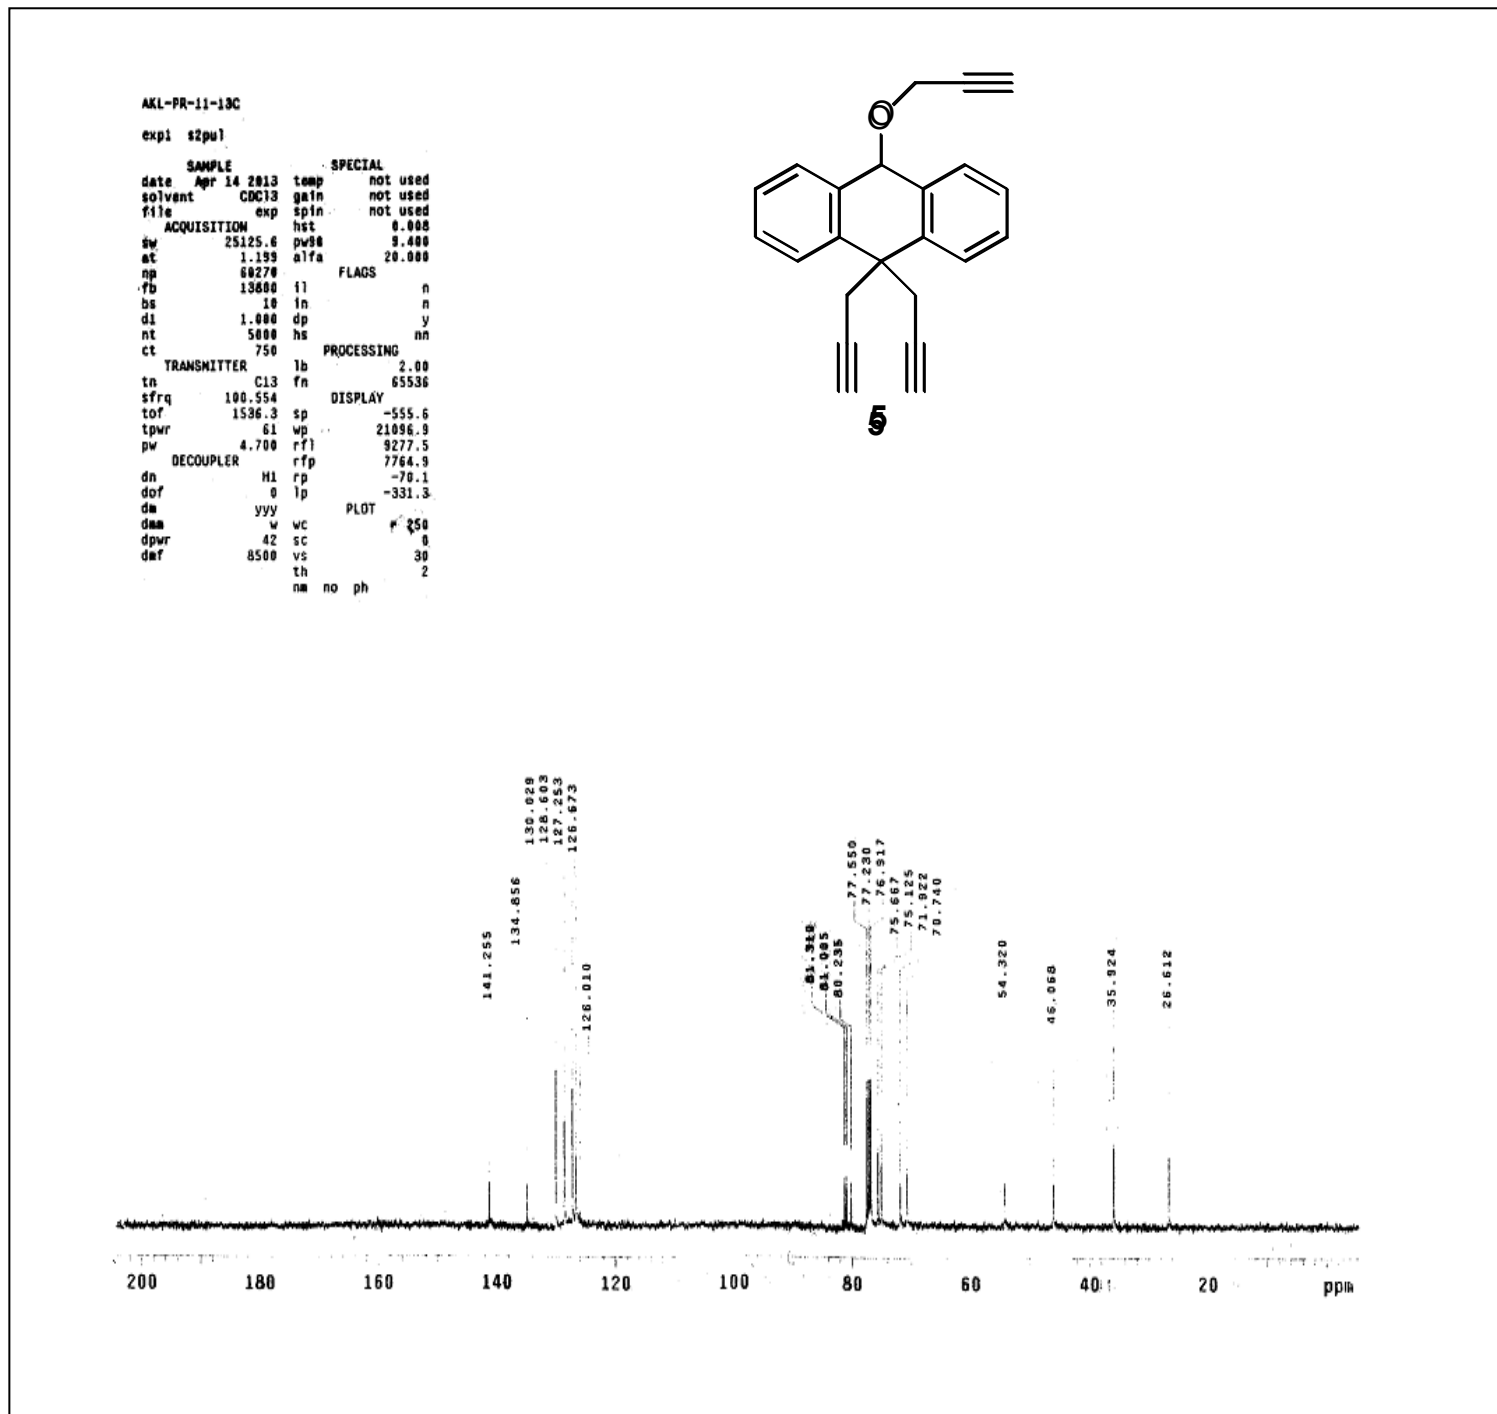

<sup>1</sup>H NMR spectra of **8a**

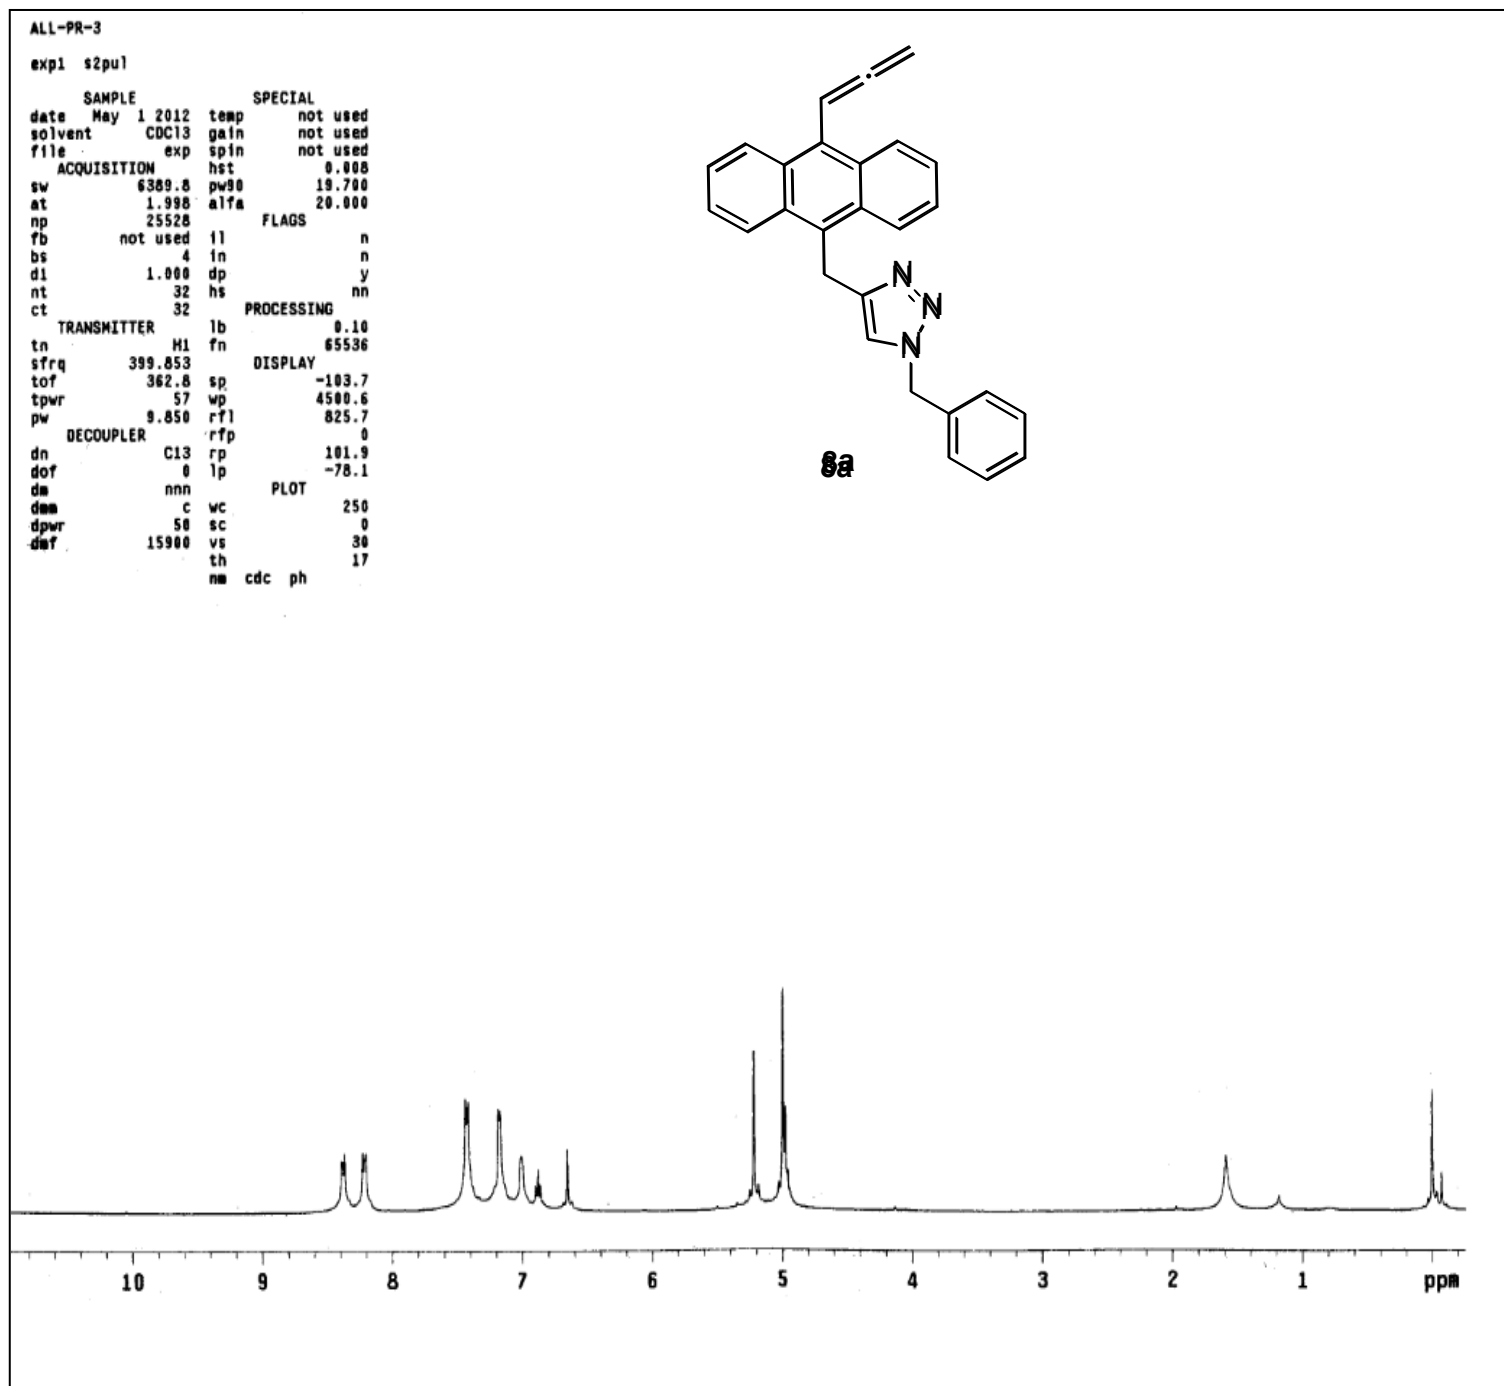

$^{13}\text{C}$  NMR spectra of **8a**

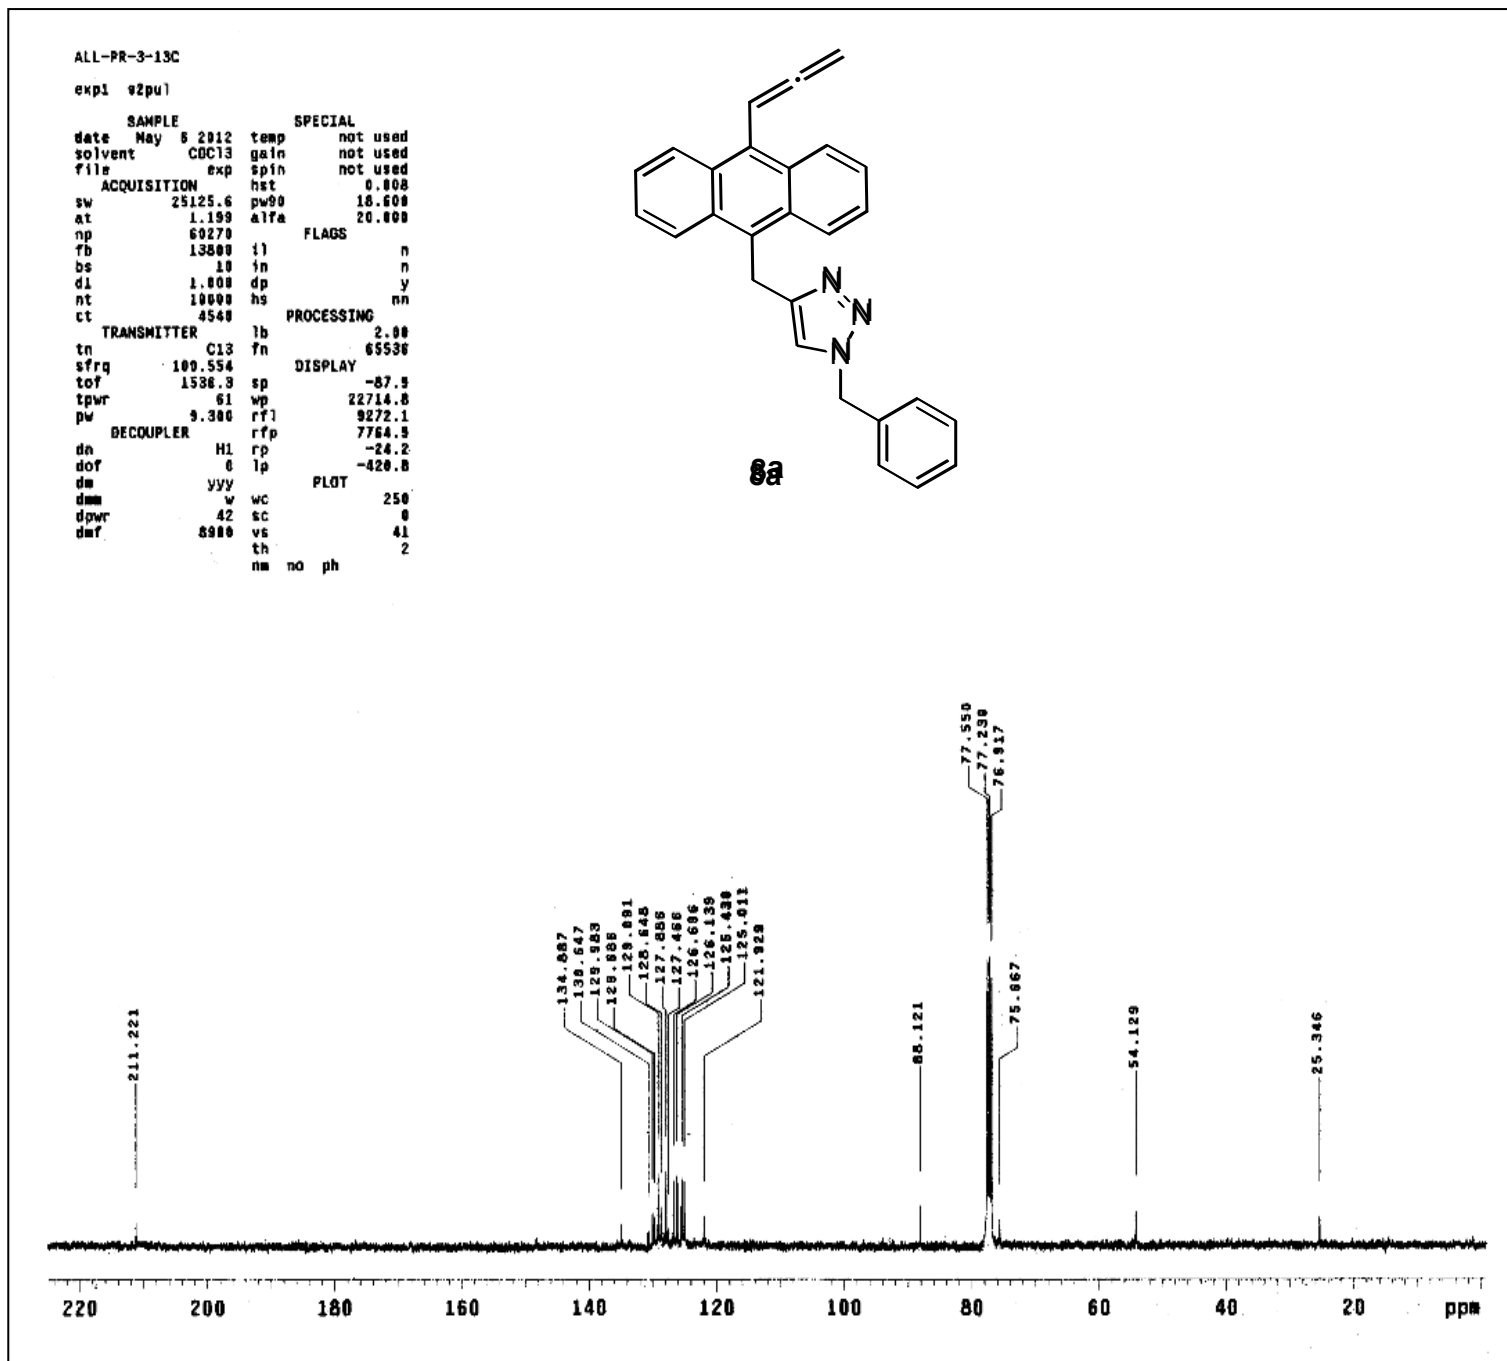

<sup>1</sup>H NMR spectra of **8b**

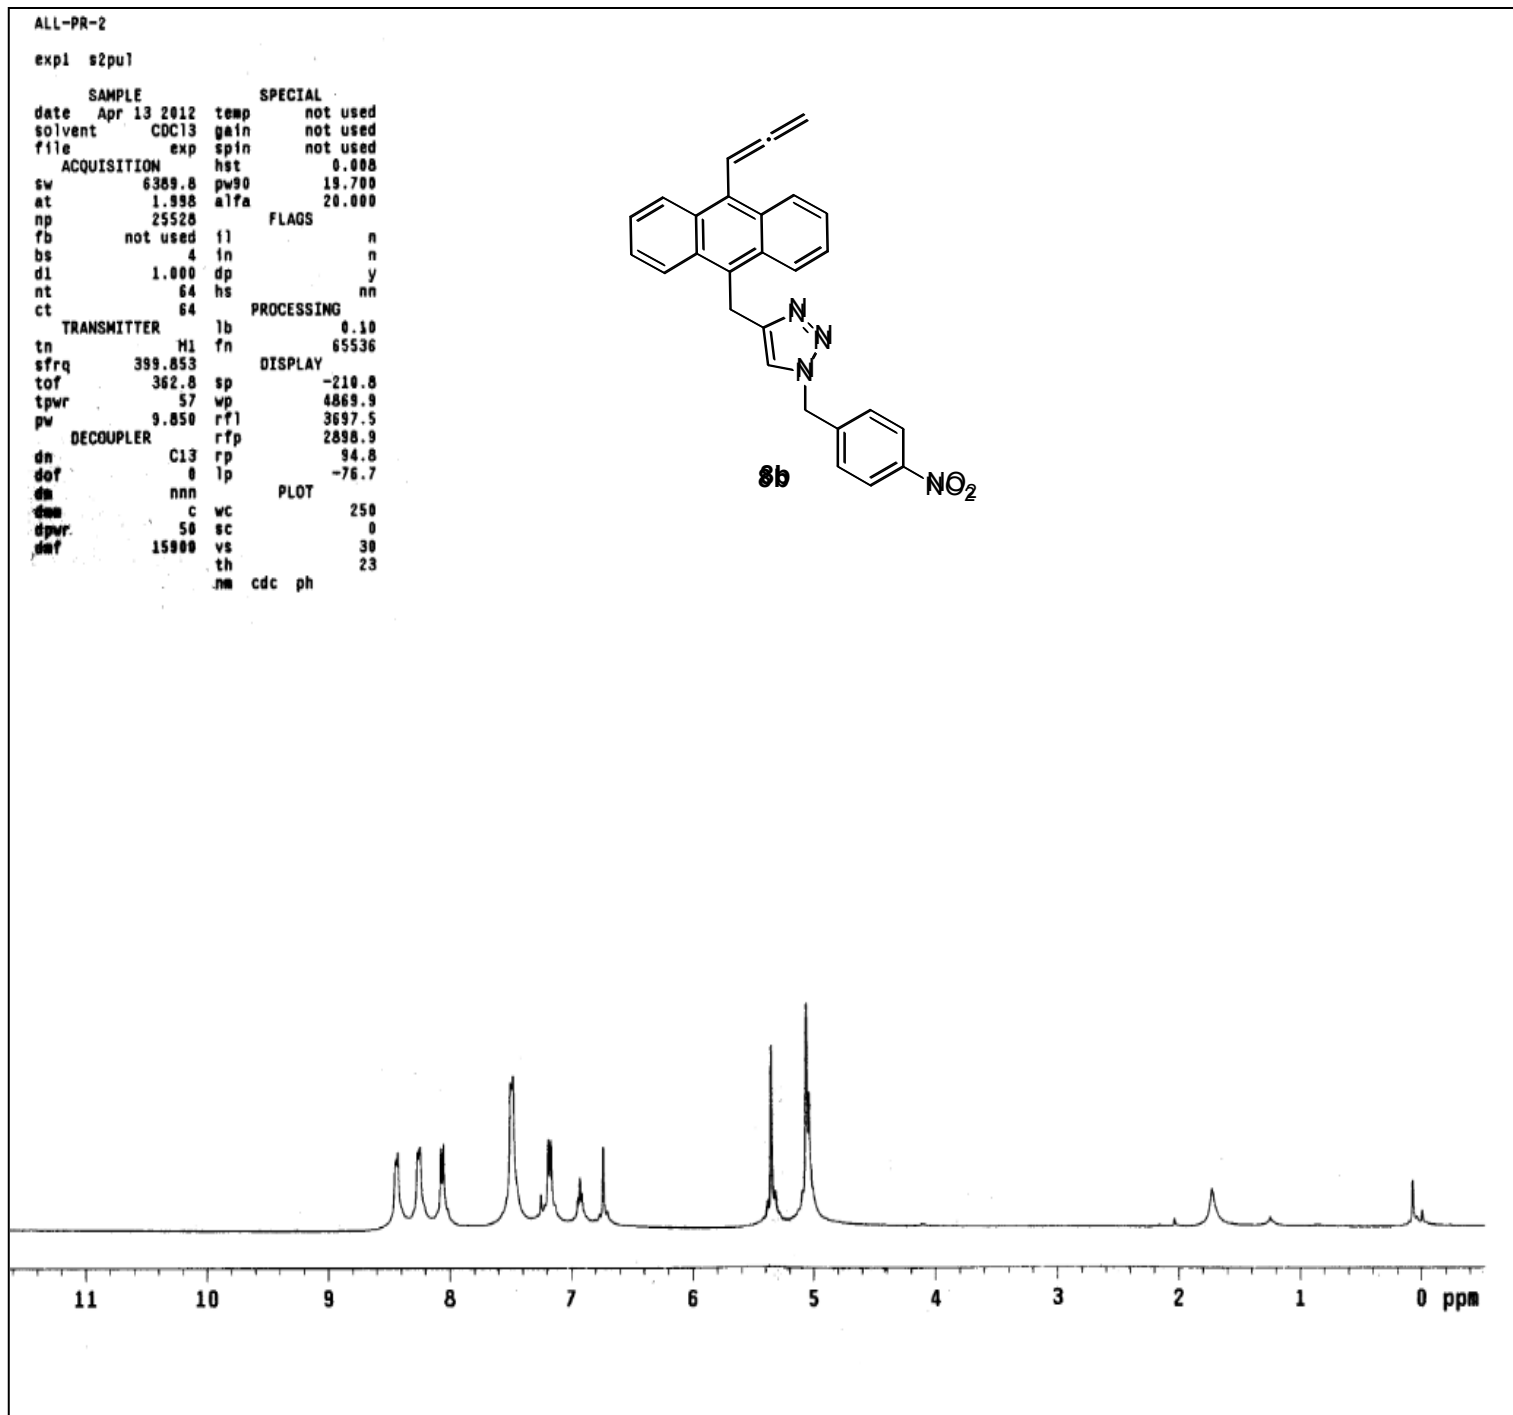



<sup>13</sup>C NMR spectra of **8b**

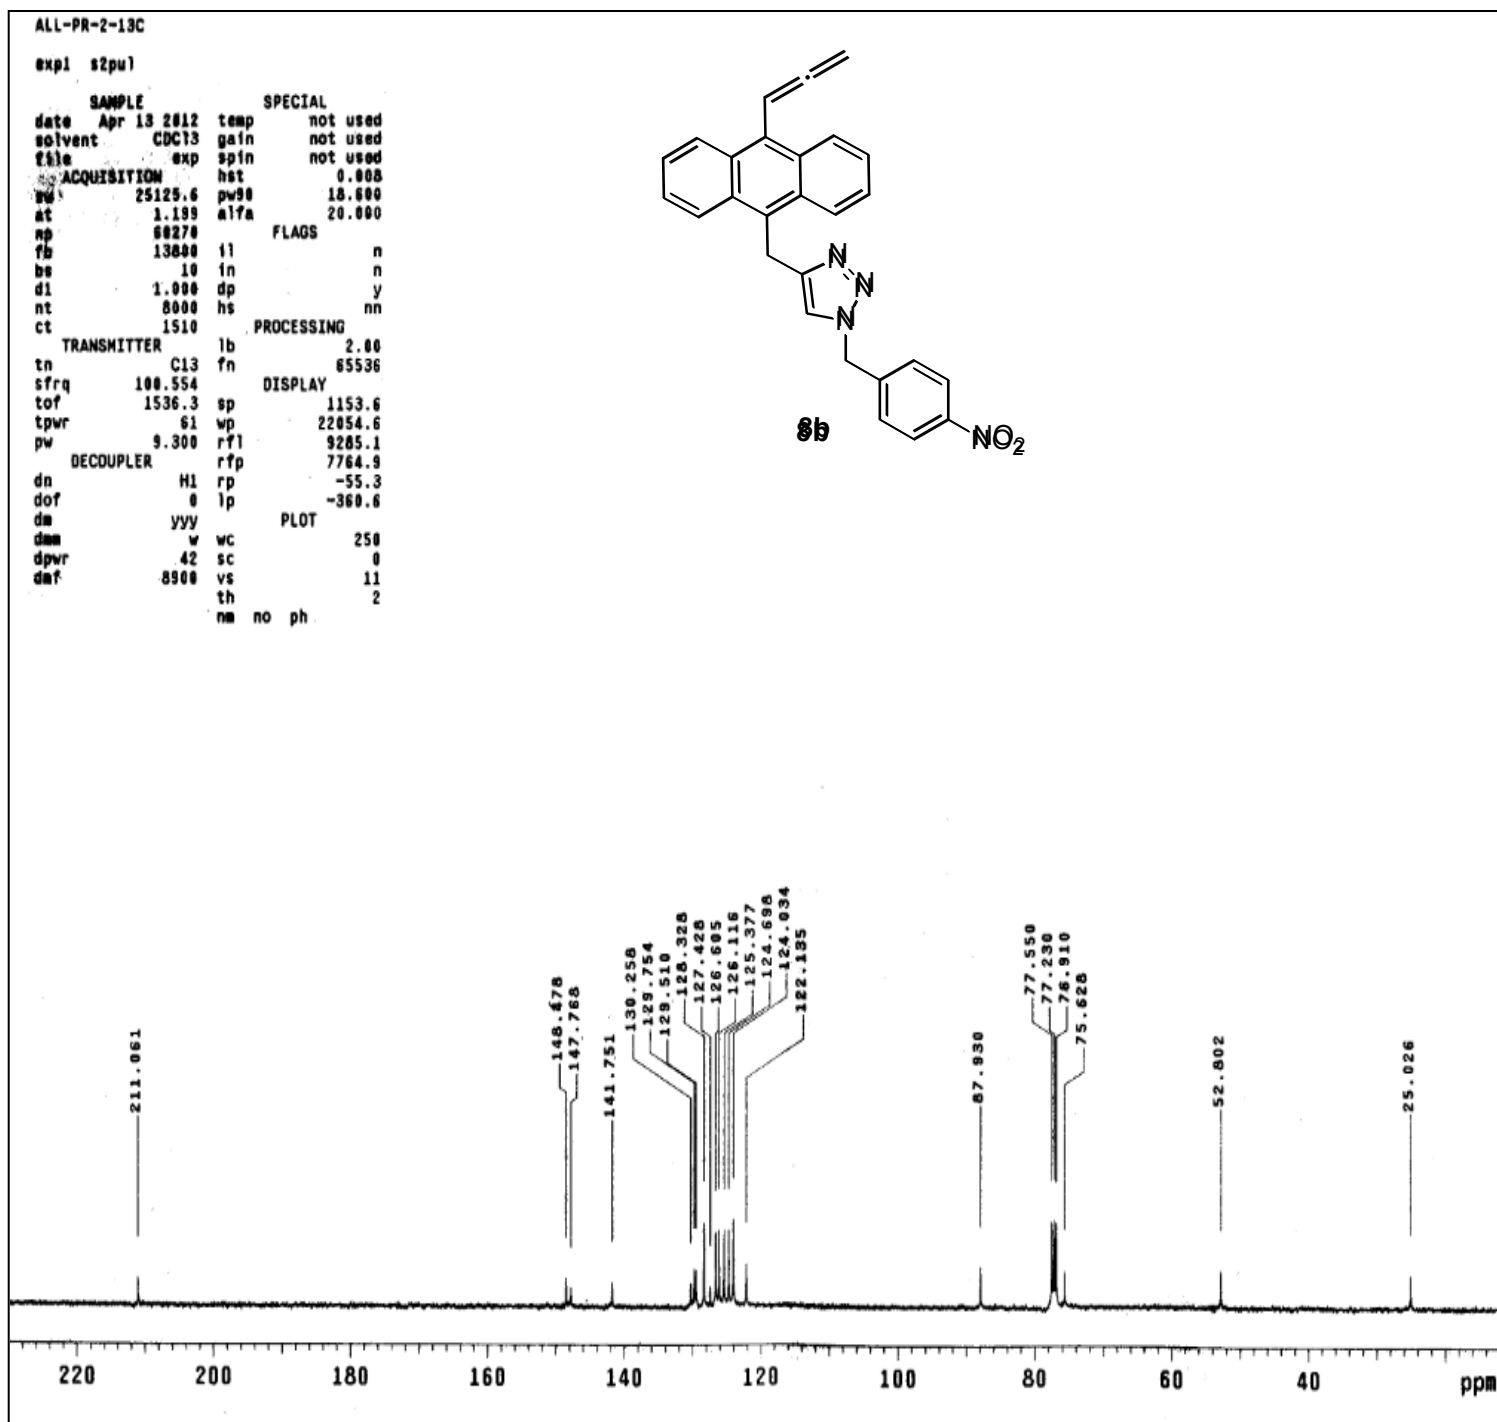

<sup>1</sup>H NMR spectra of **8c**

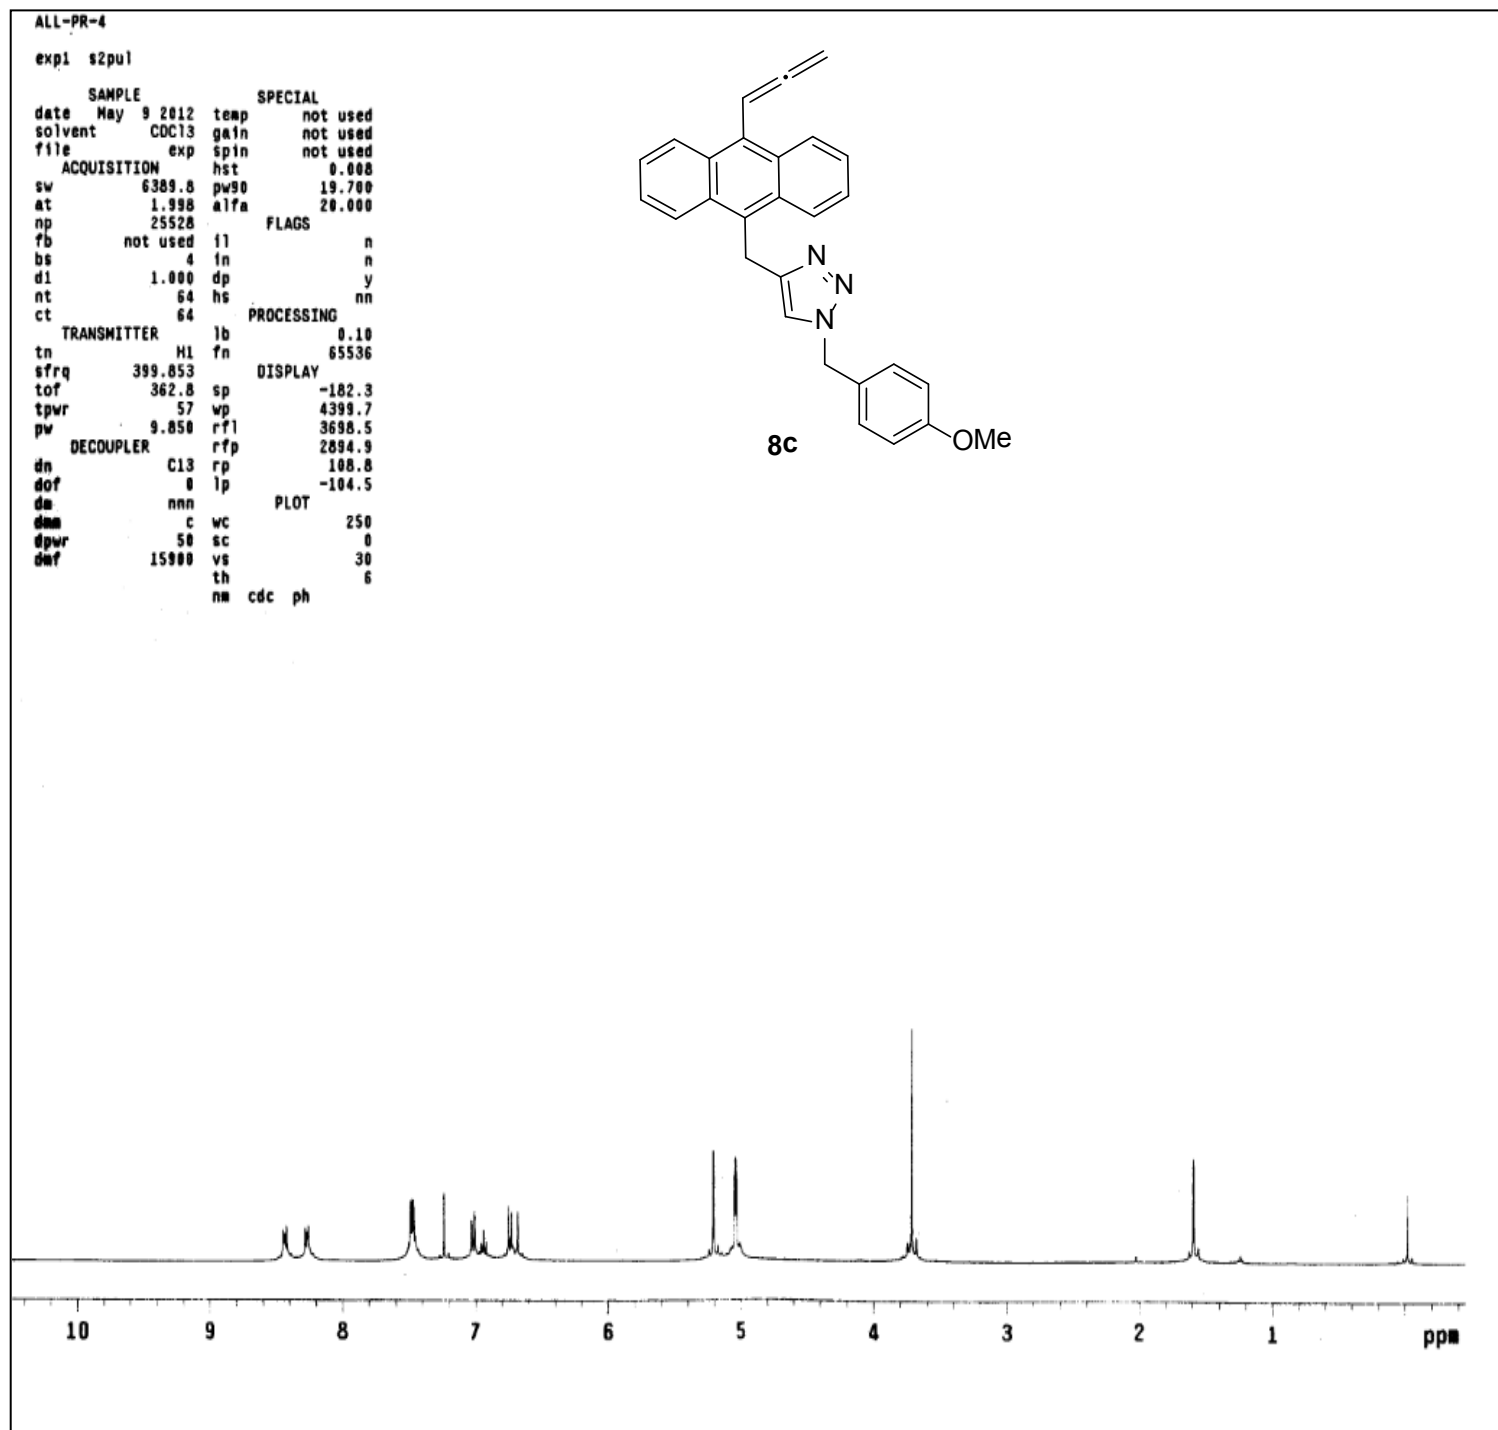

<sup>13</sup>C NMR spectra of 8c

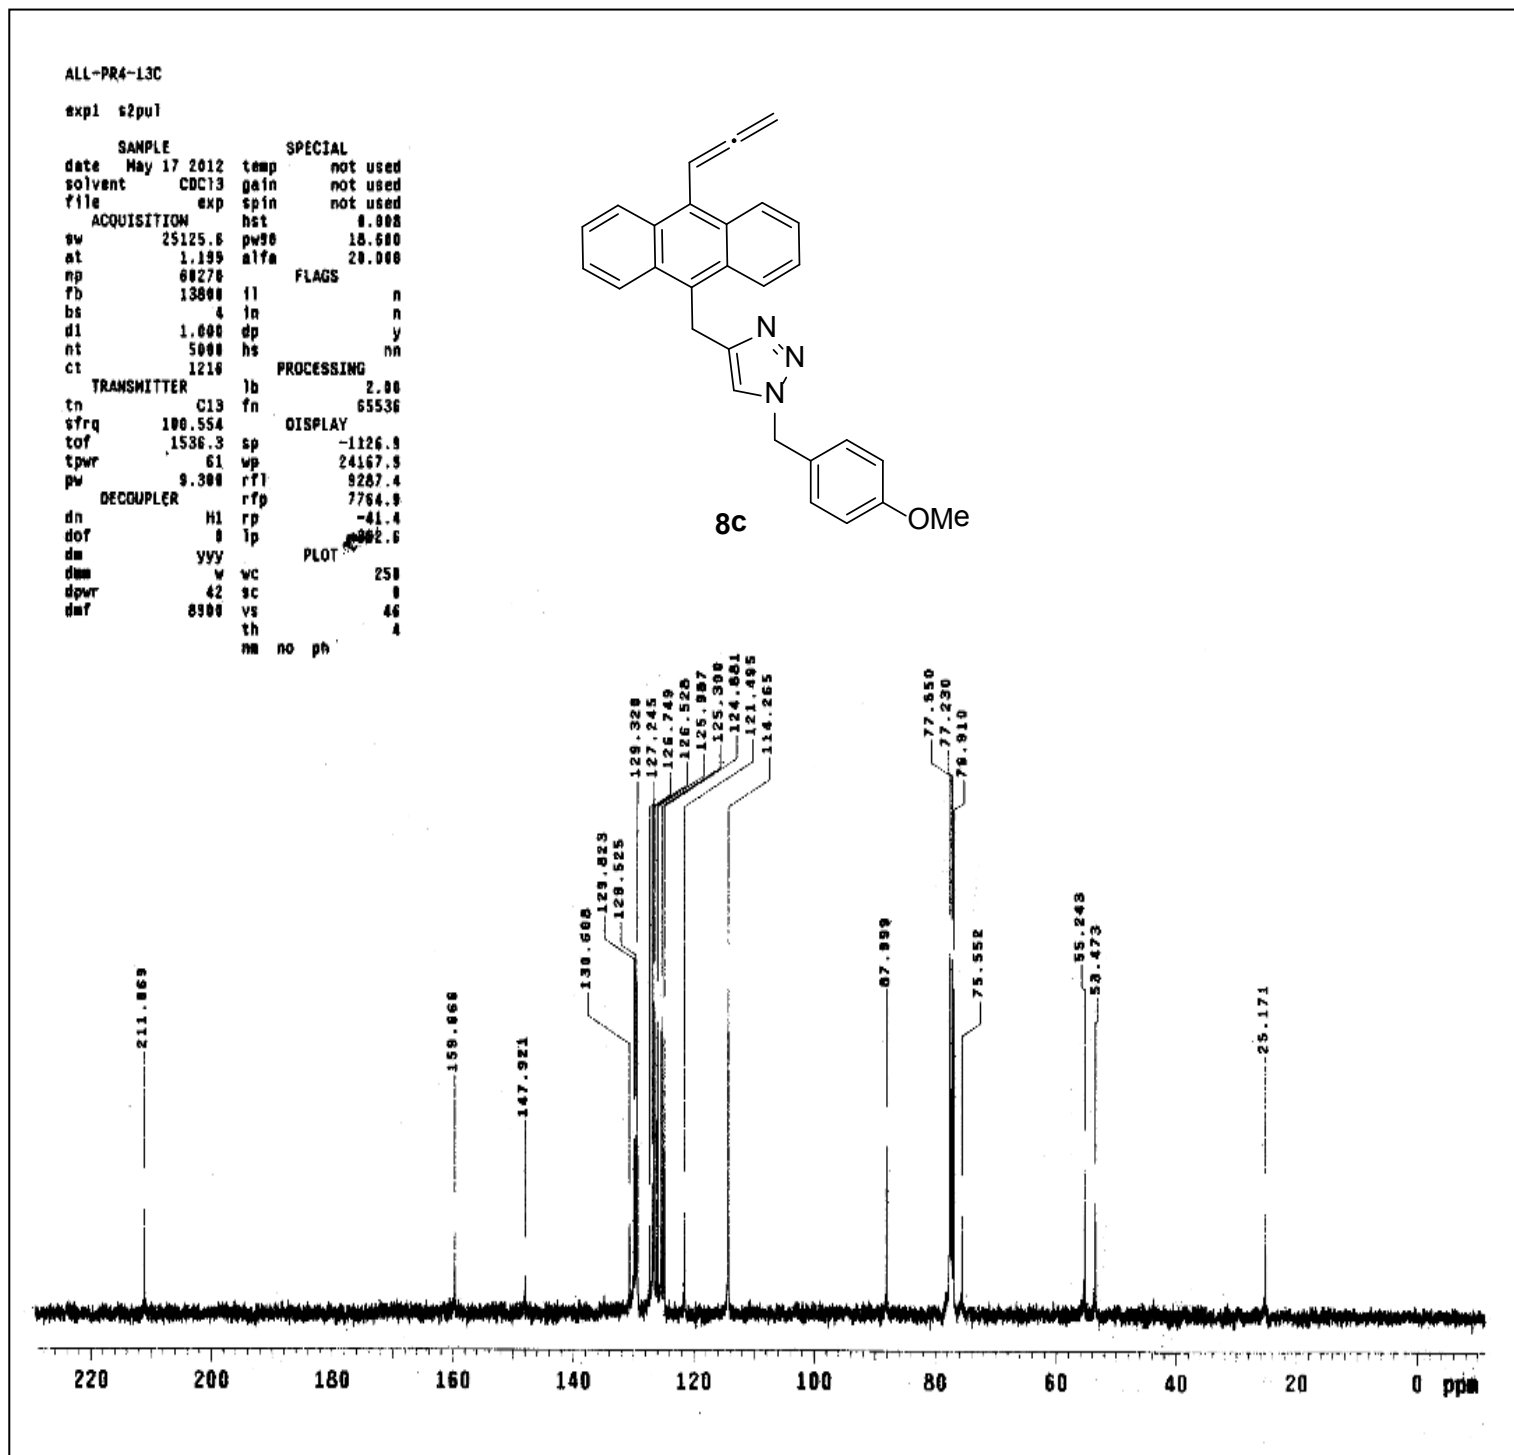

<sup>1</sup>H NMR spectra of **8d**

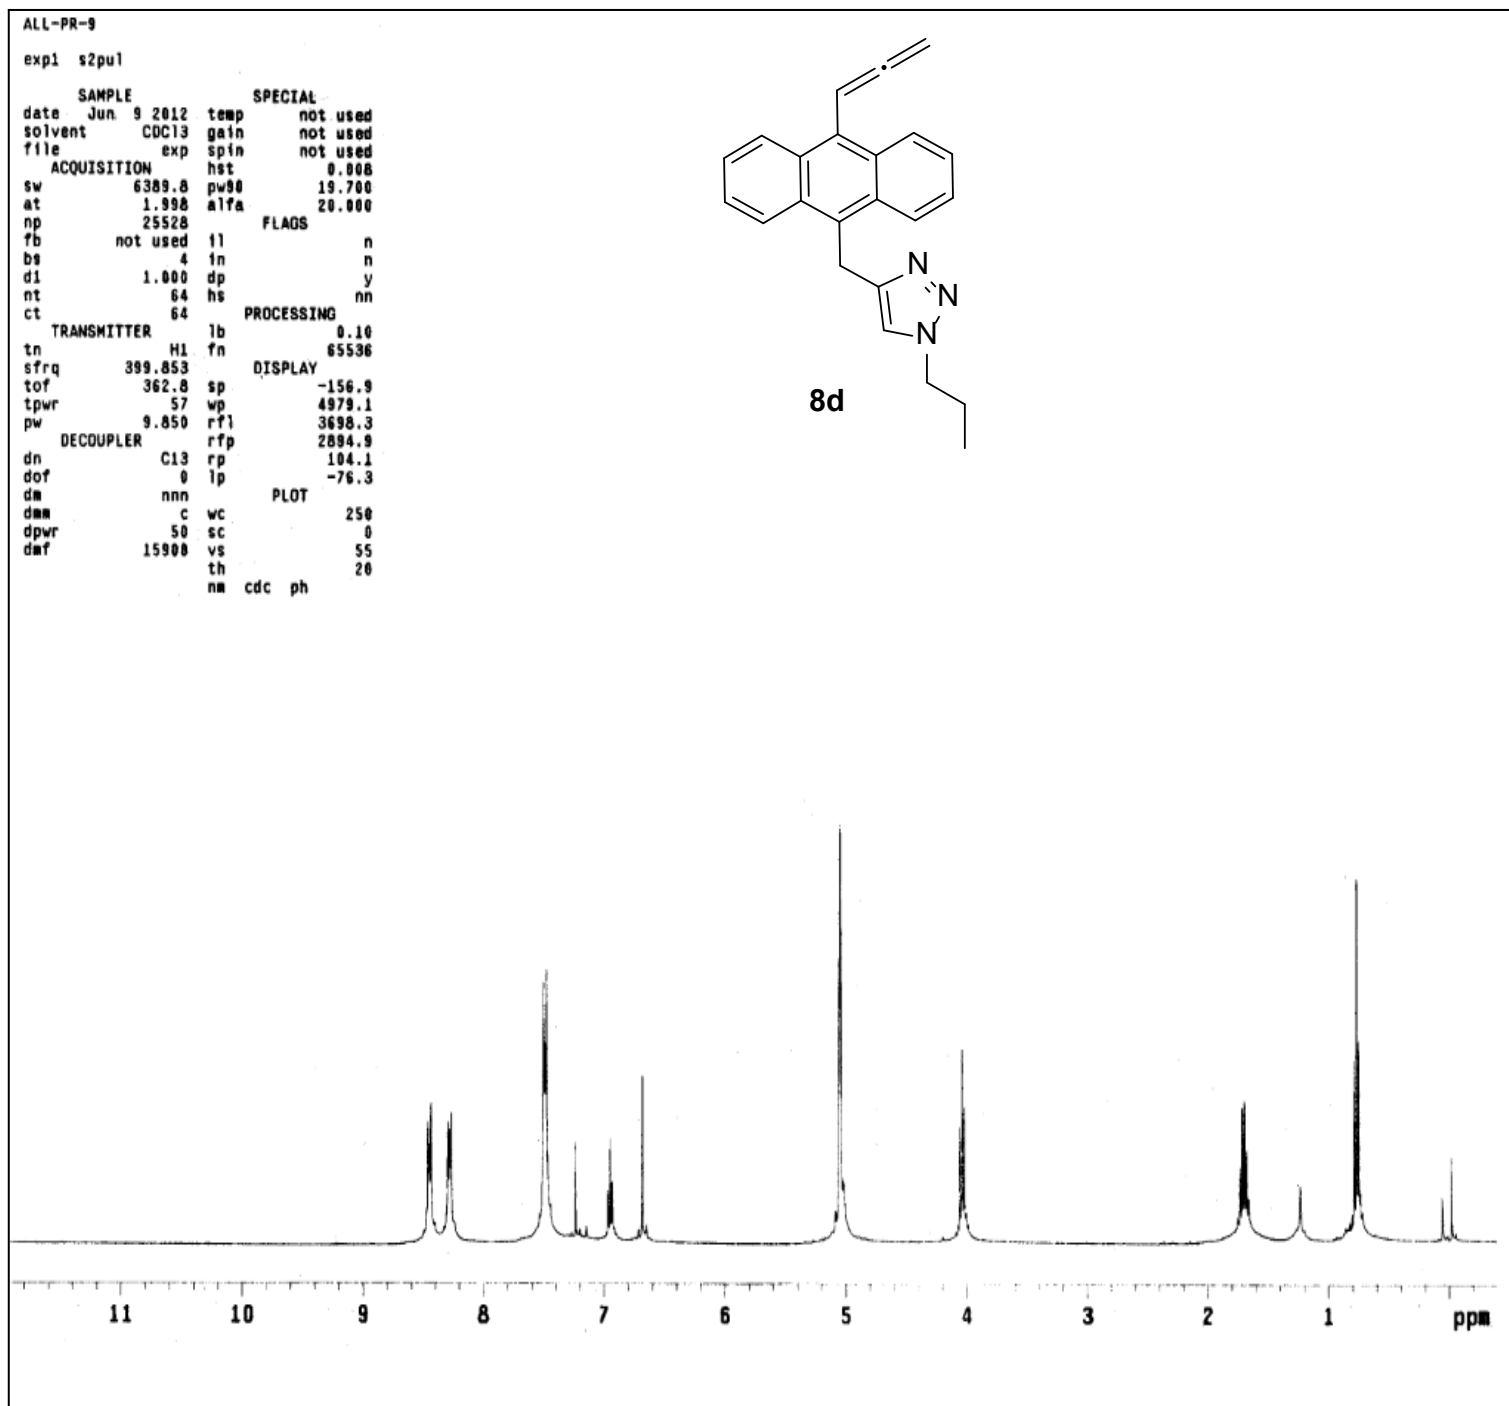

$^{13}\text{C}$  NMR spectra of **8d**

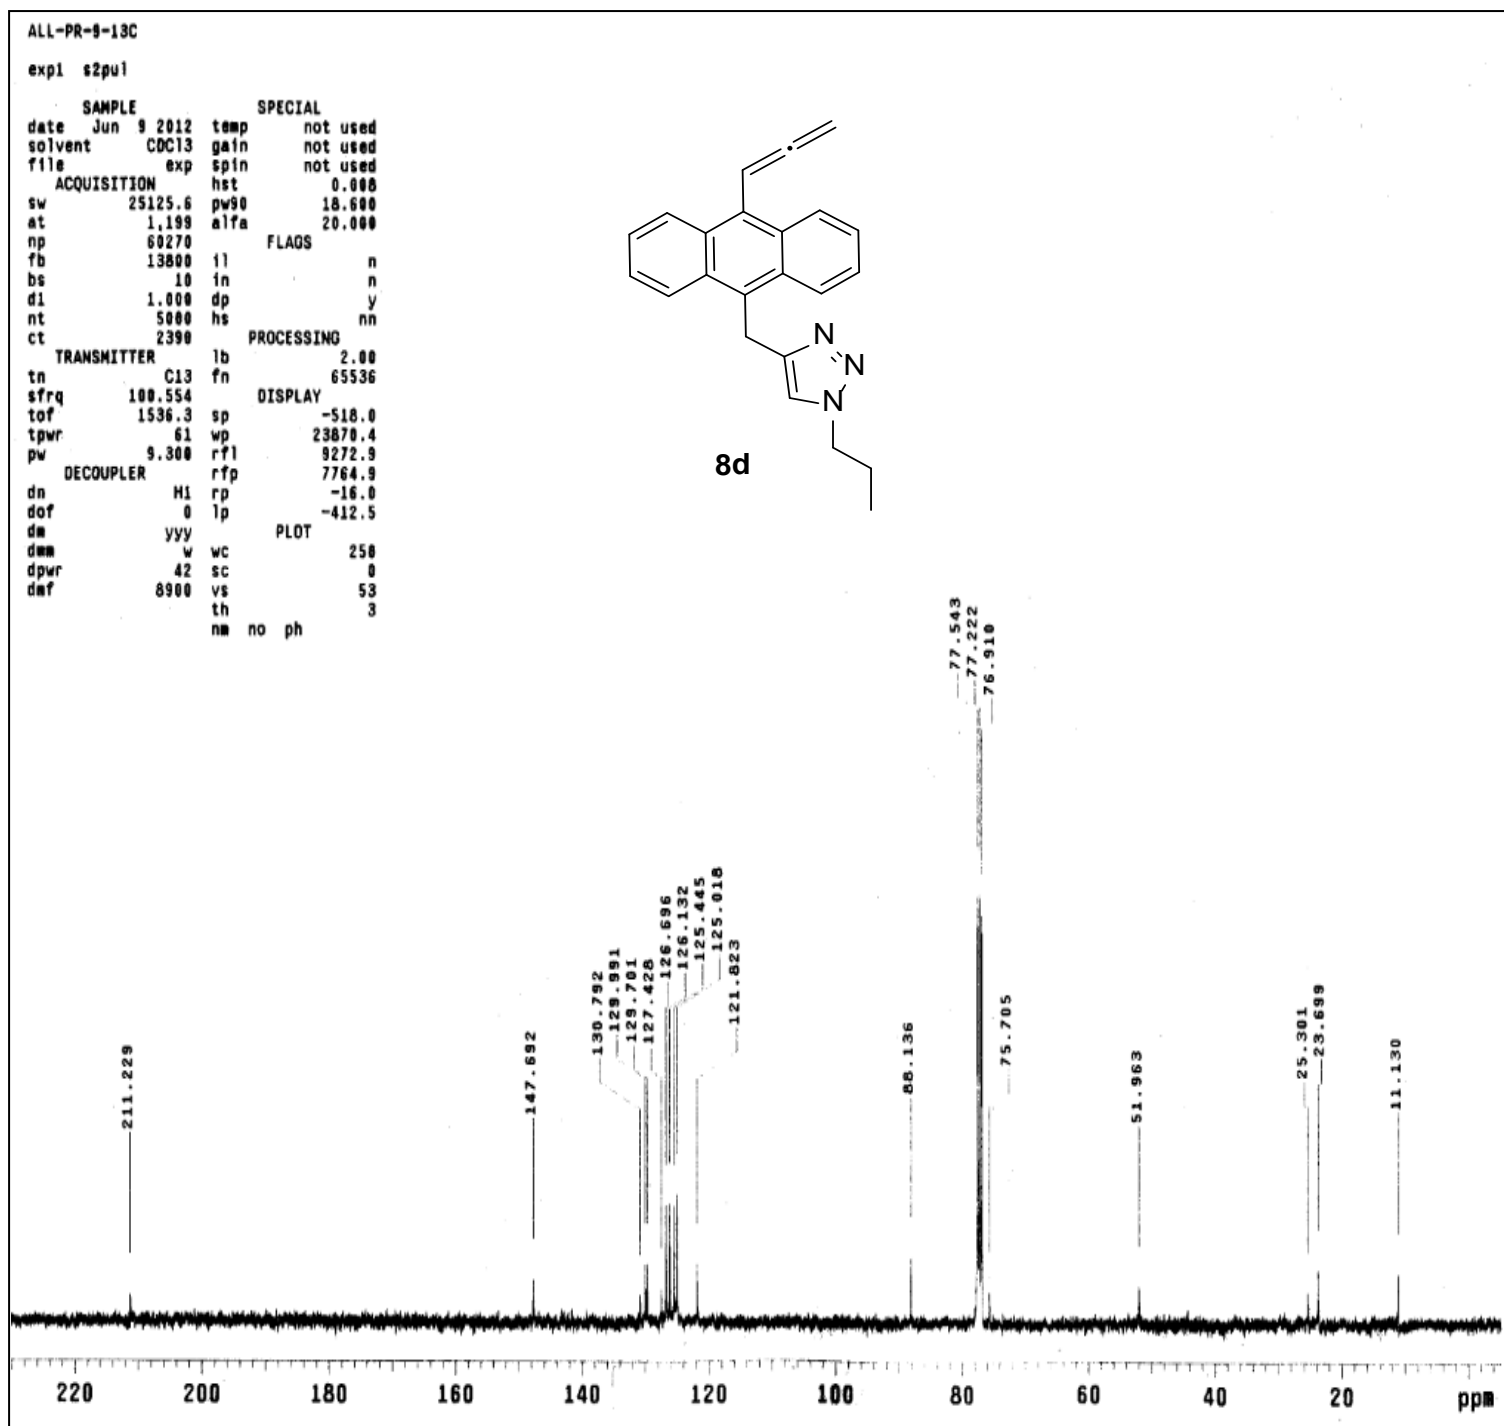

<sup>1</sup>H NMR spectra of **8e**

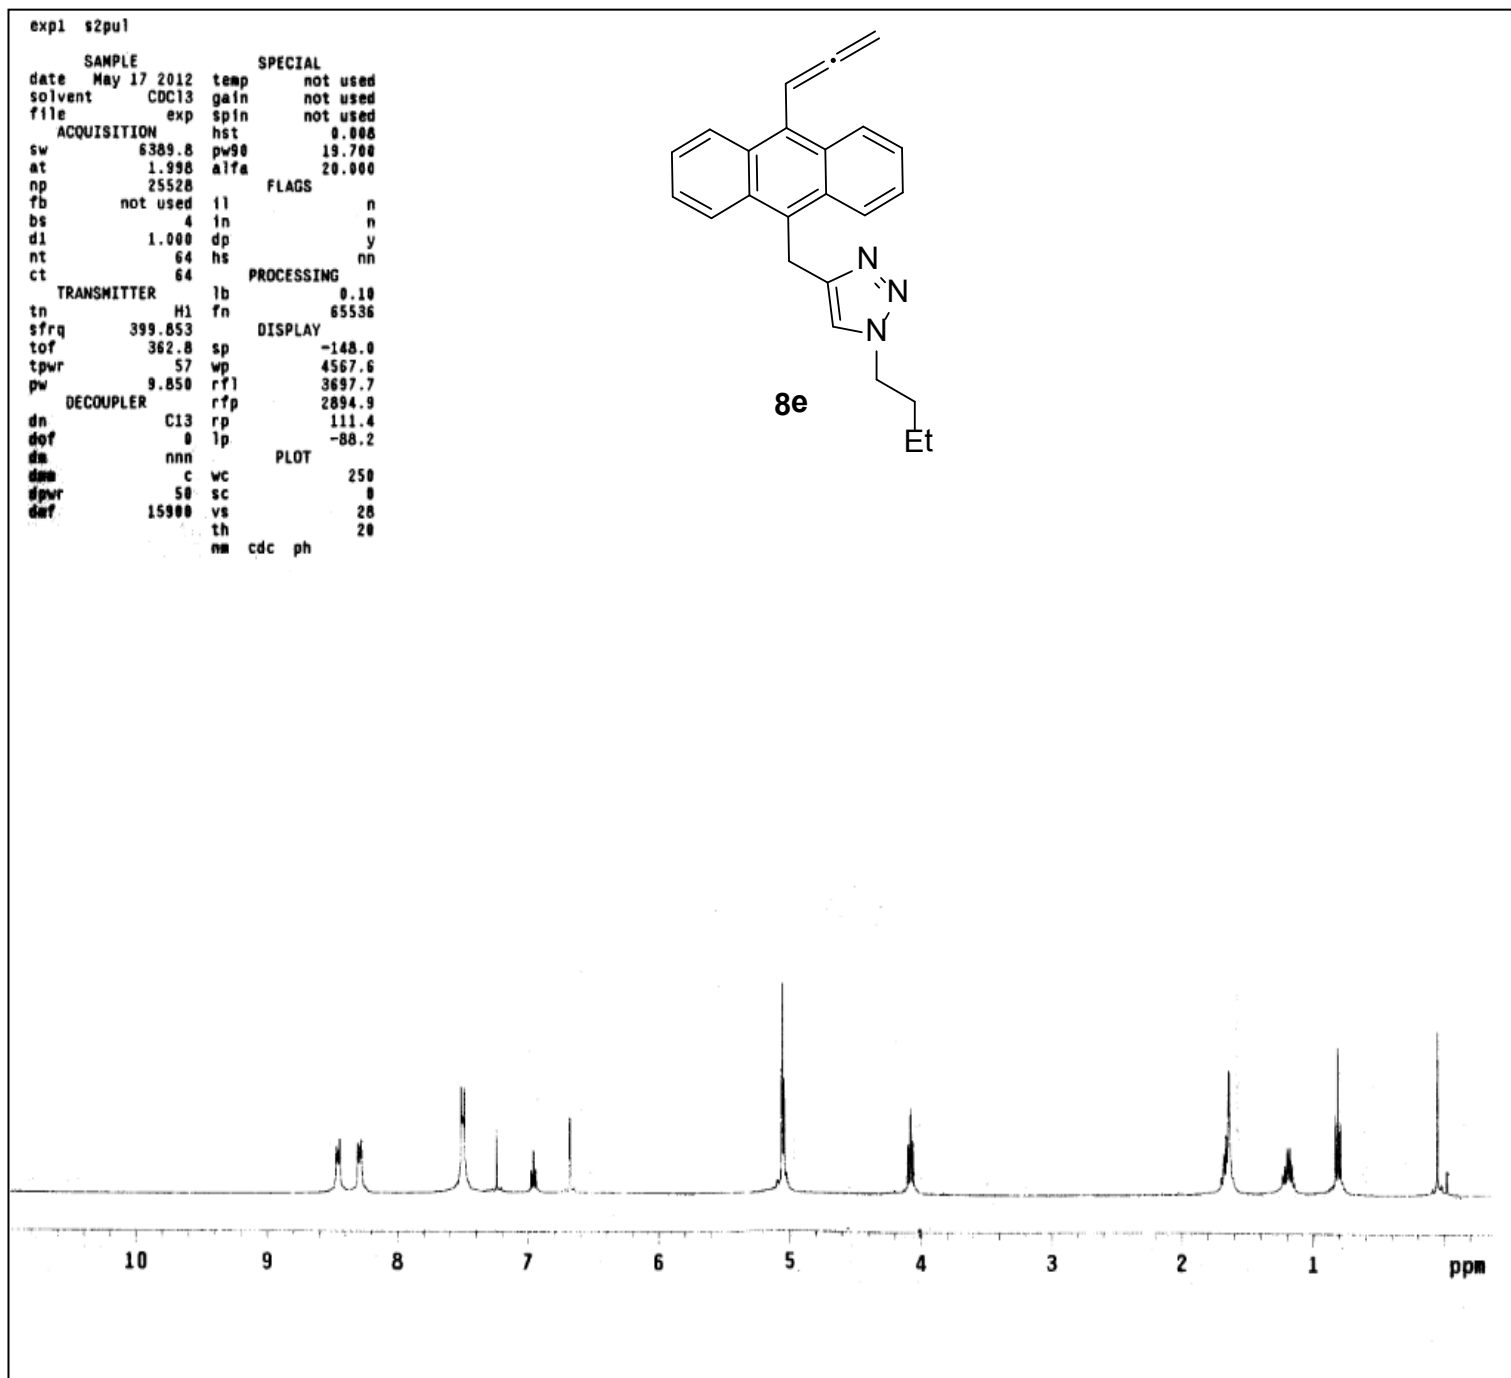

<sup>13</sup>C NMR spectra of **8e**

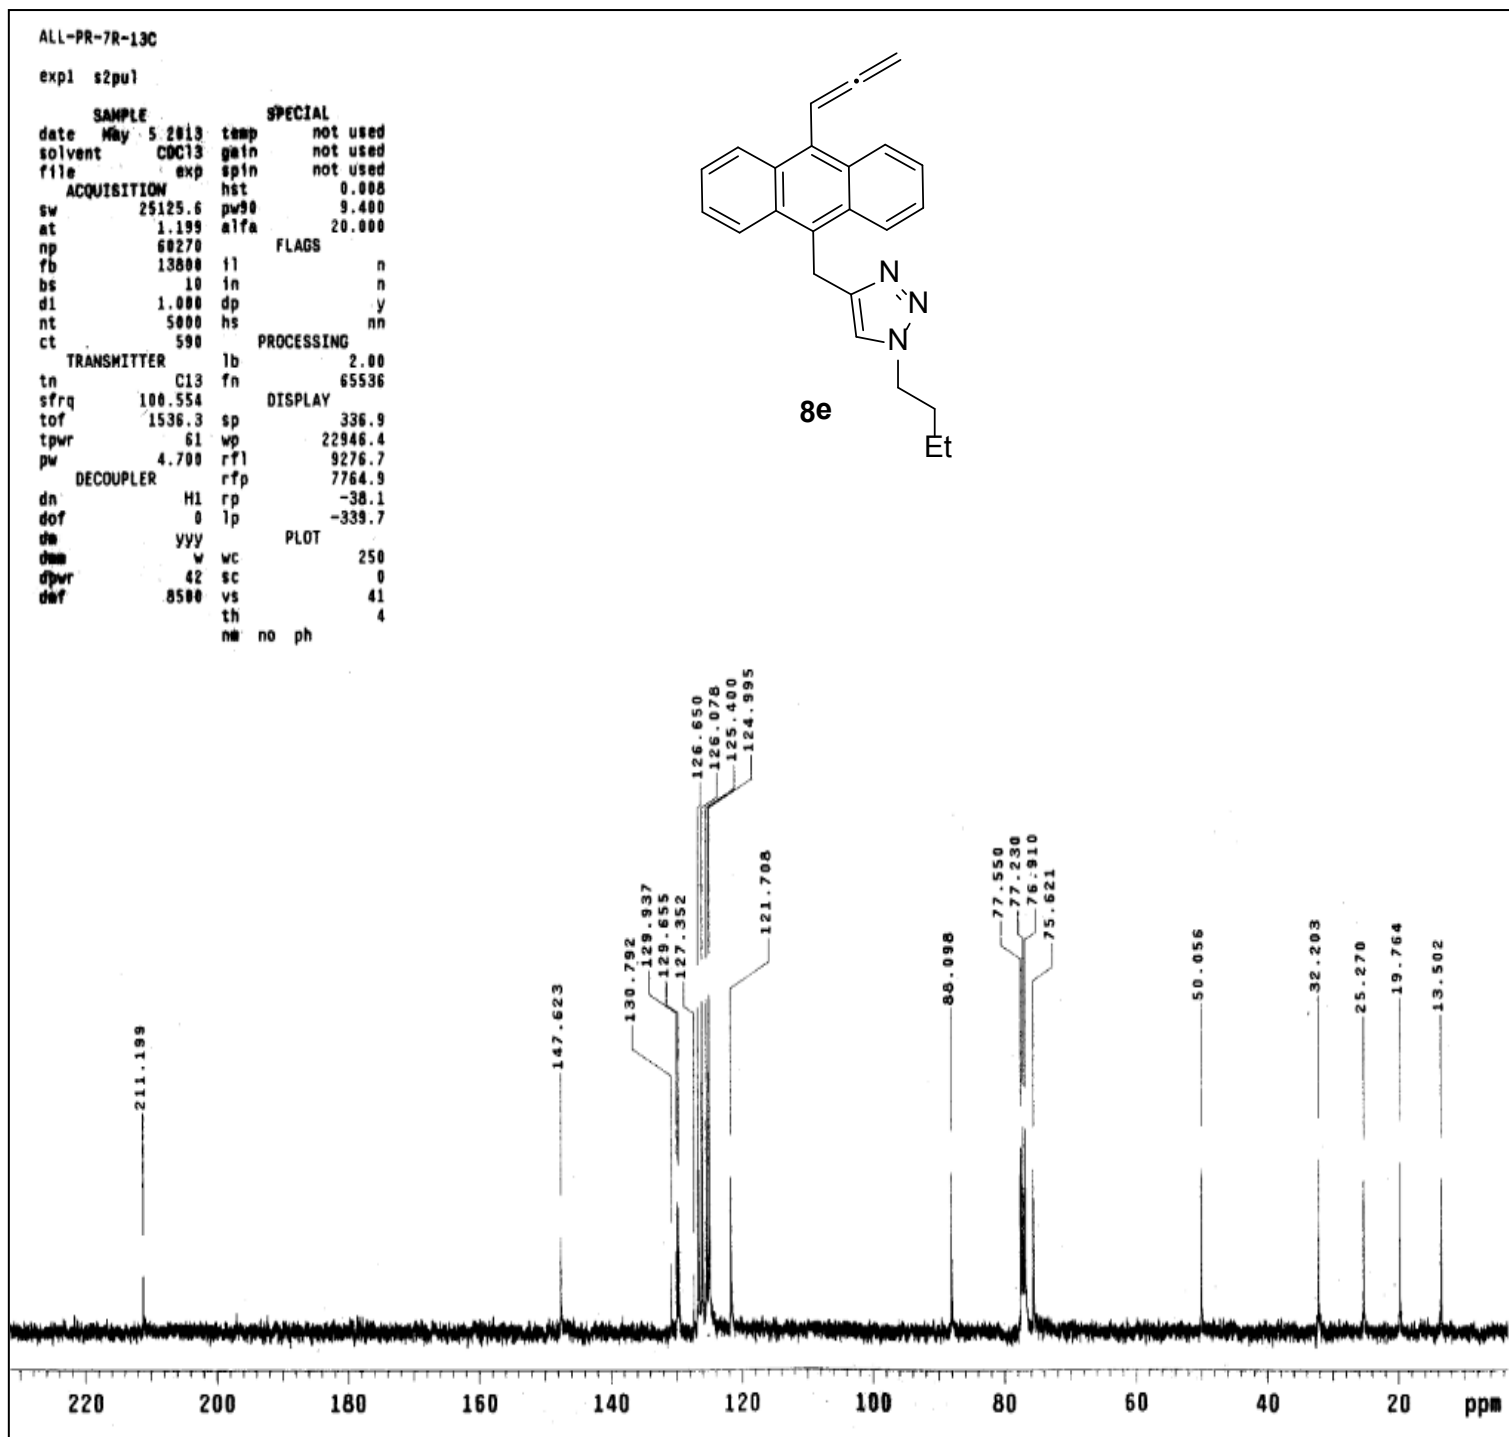

<sup>1</sup>H NMR spectra of **8f**

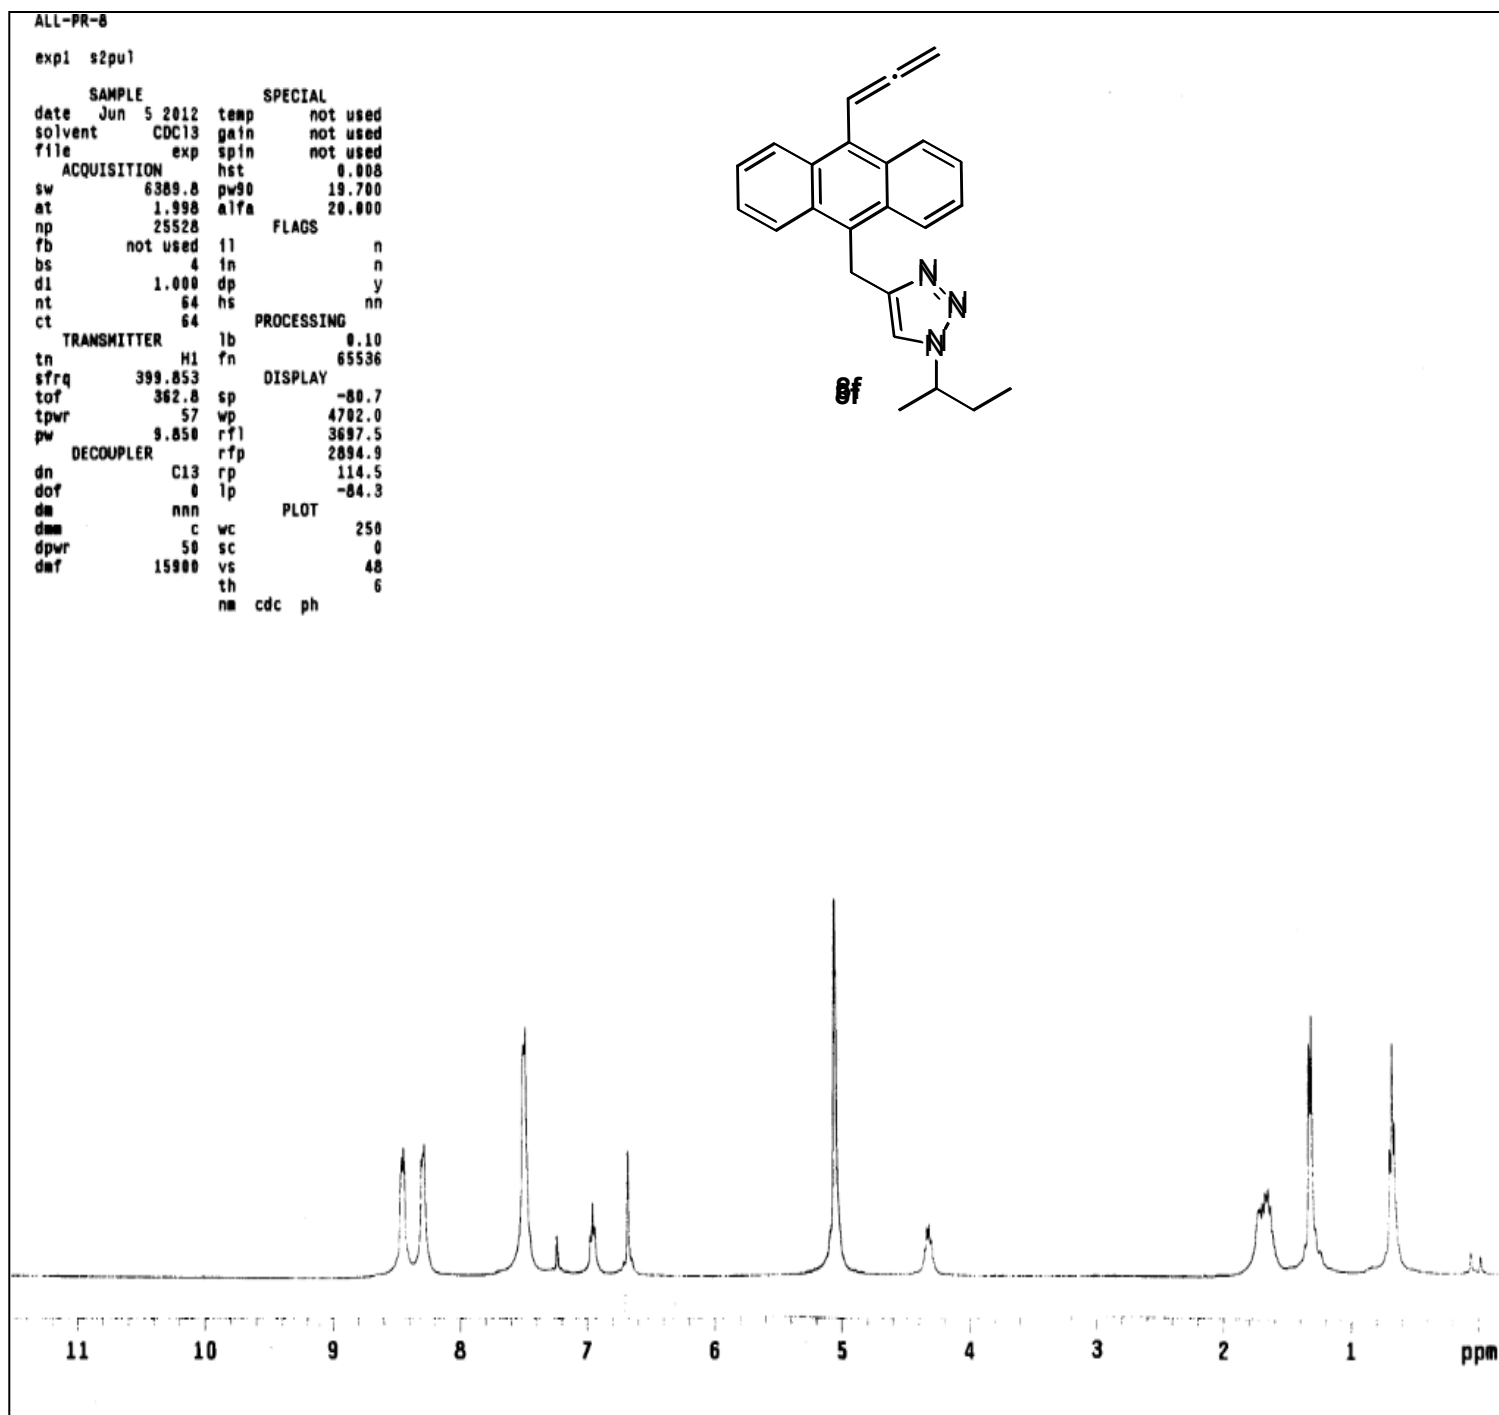



$^{13}\text{C}$  NMR spectra of **8f**

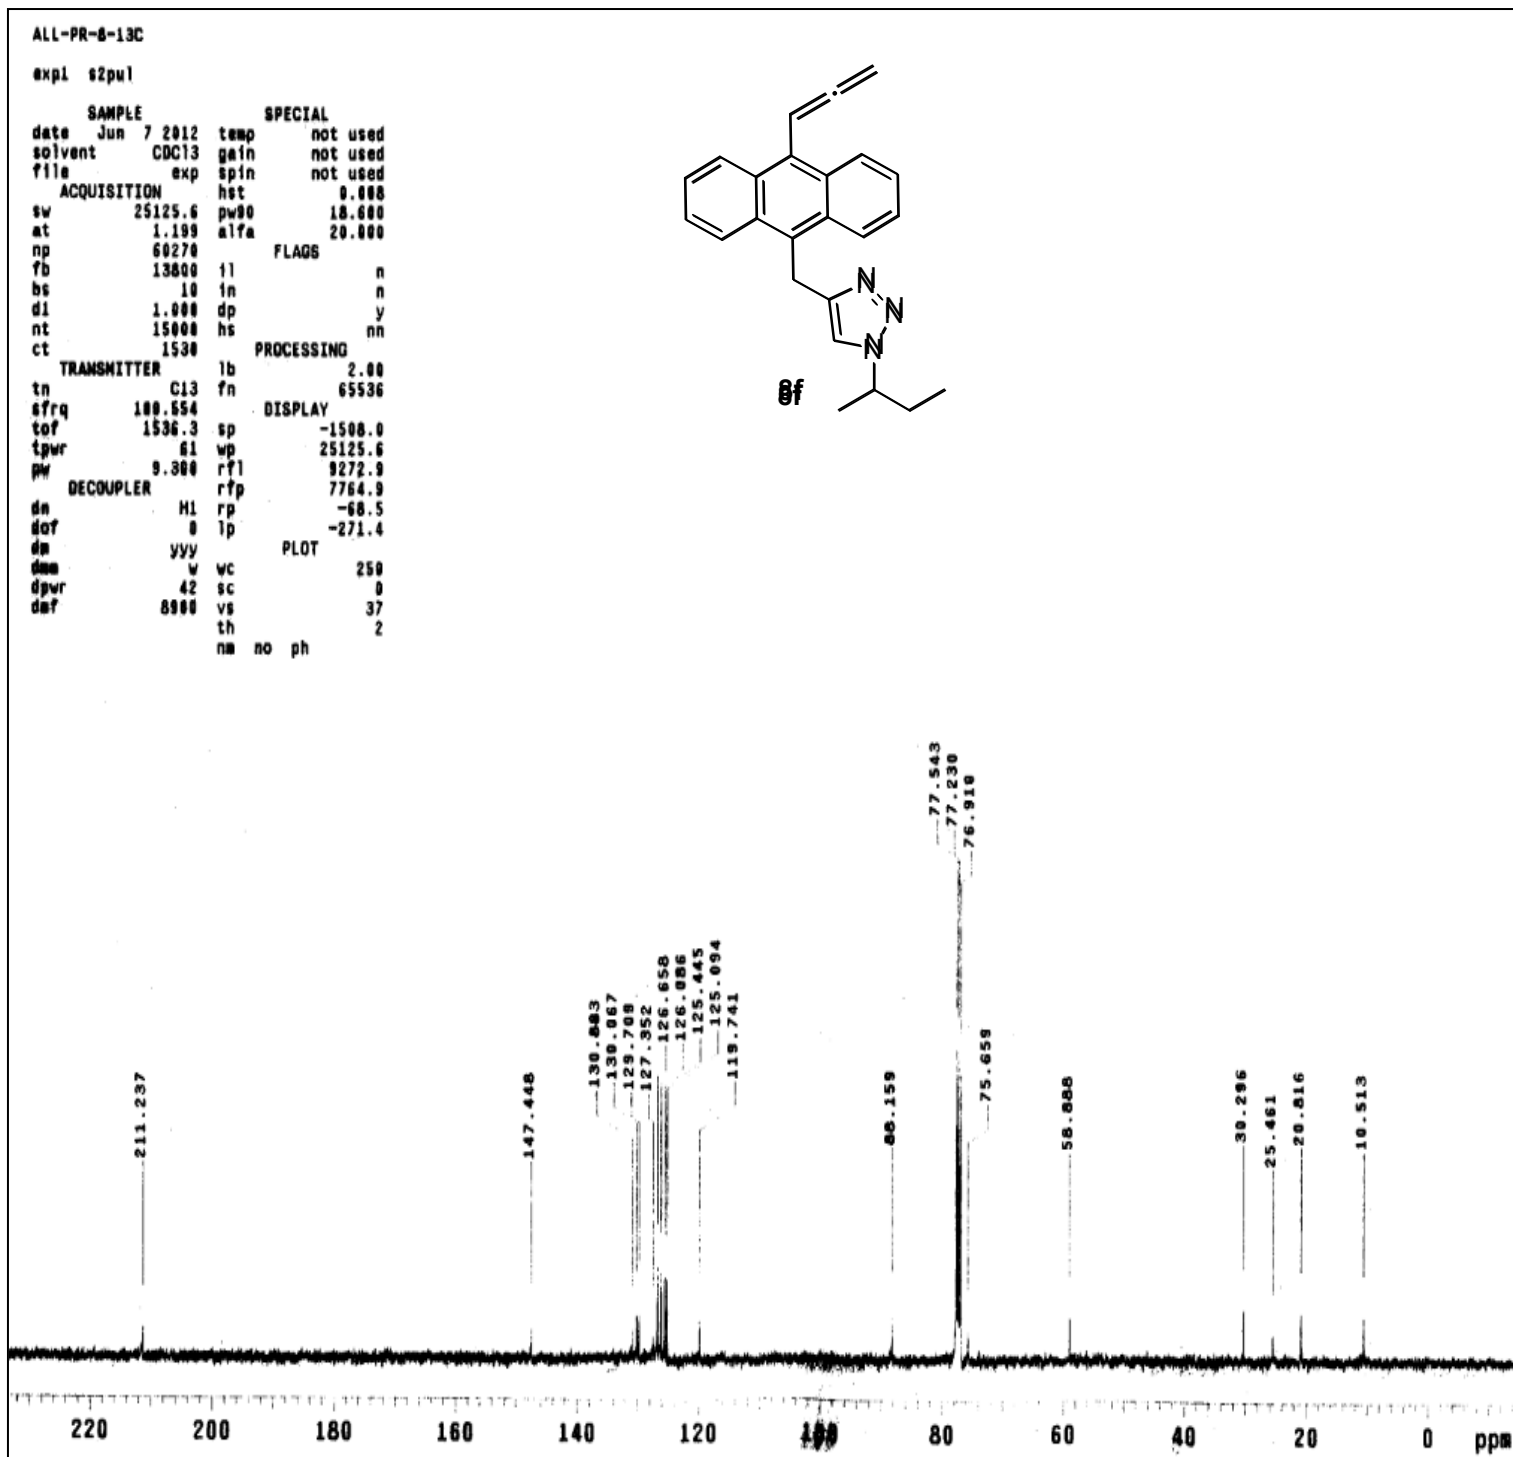

<sup>1</sup>H NMR spectra of **8g**

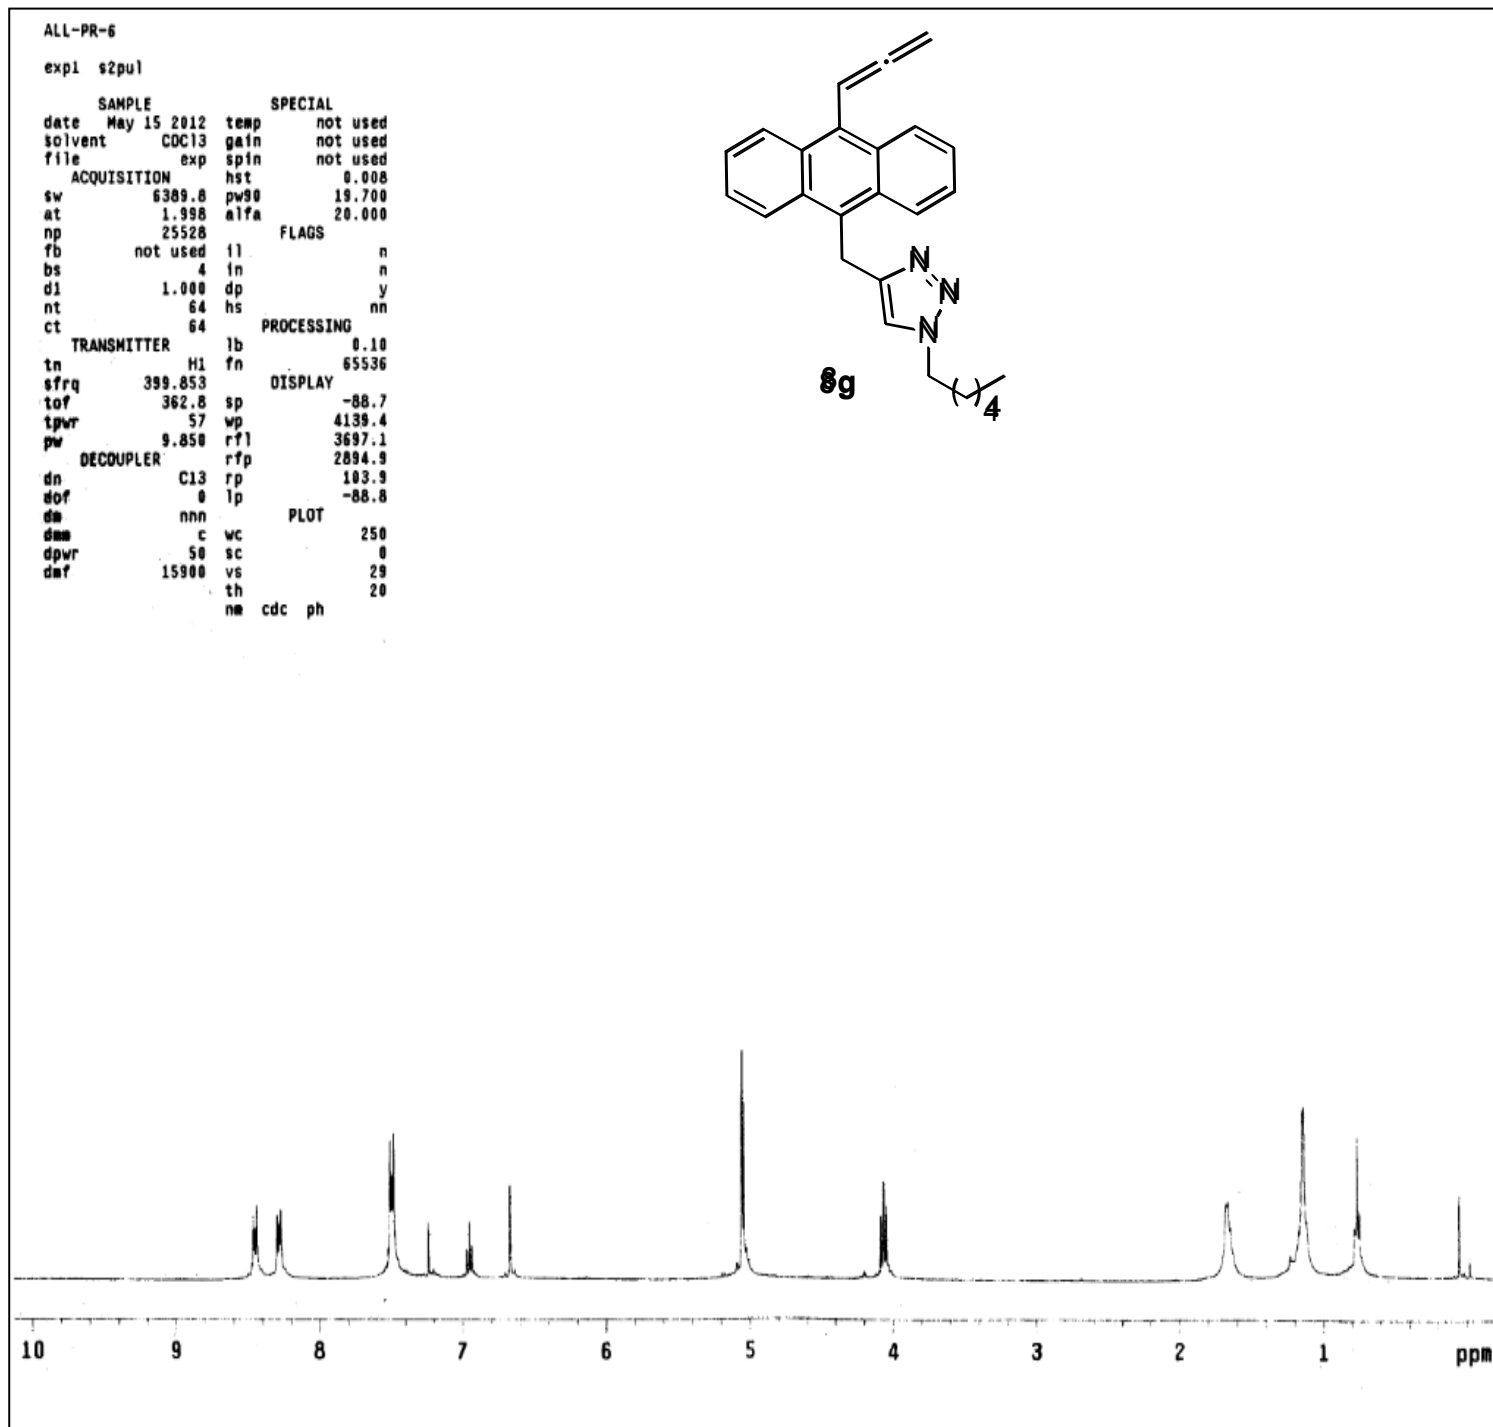

<sup>13</sup>C NMR spectra of **8g**

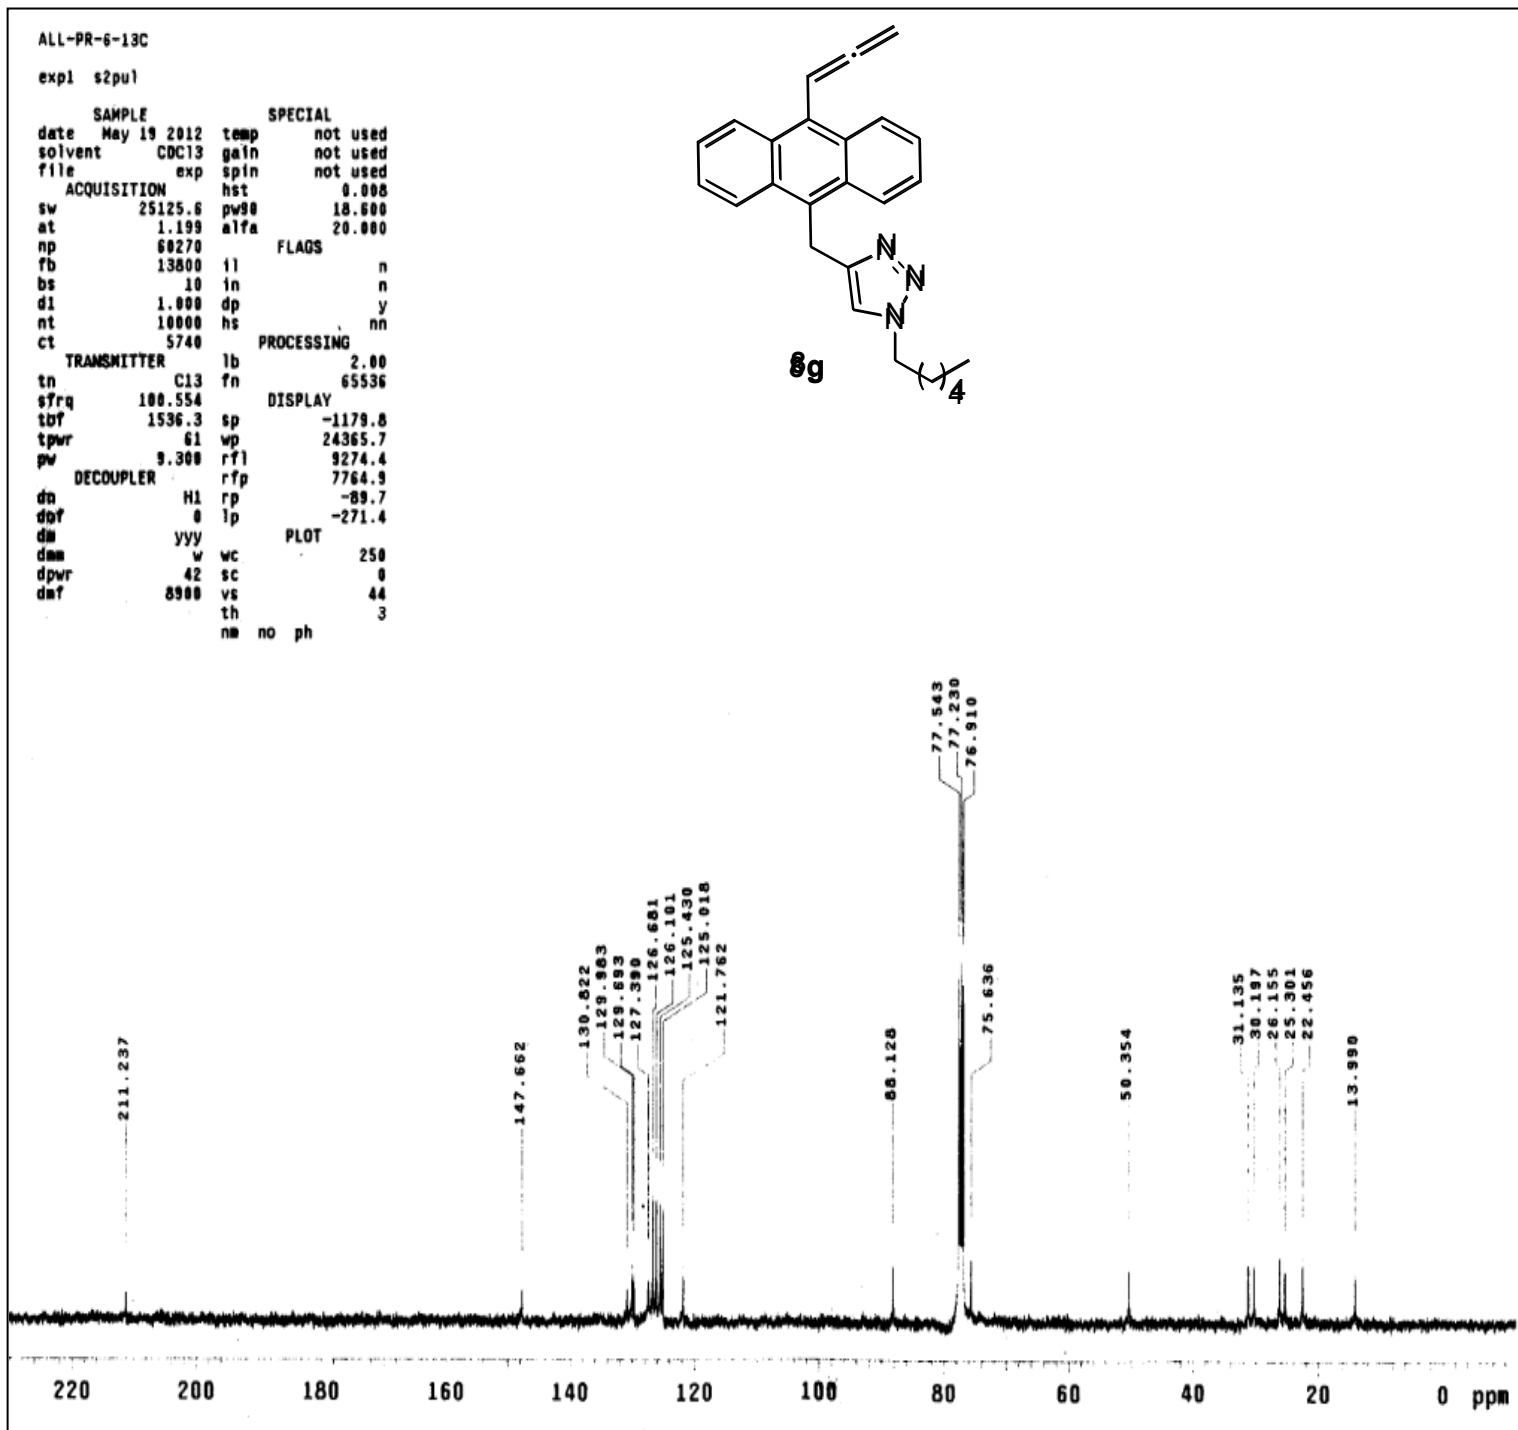

<sup>1</sup>H NMR spectra of **8h**

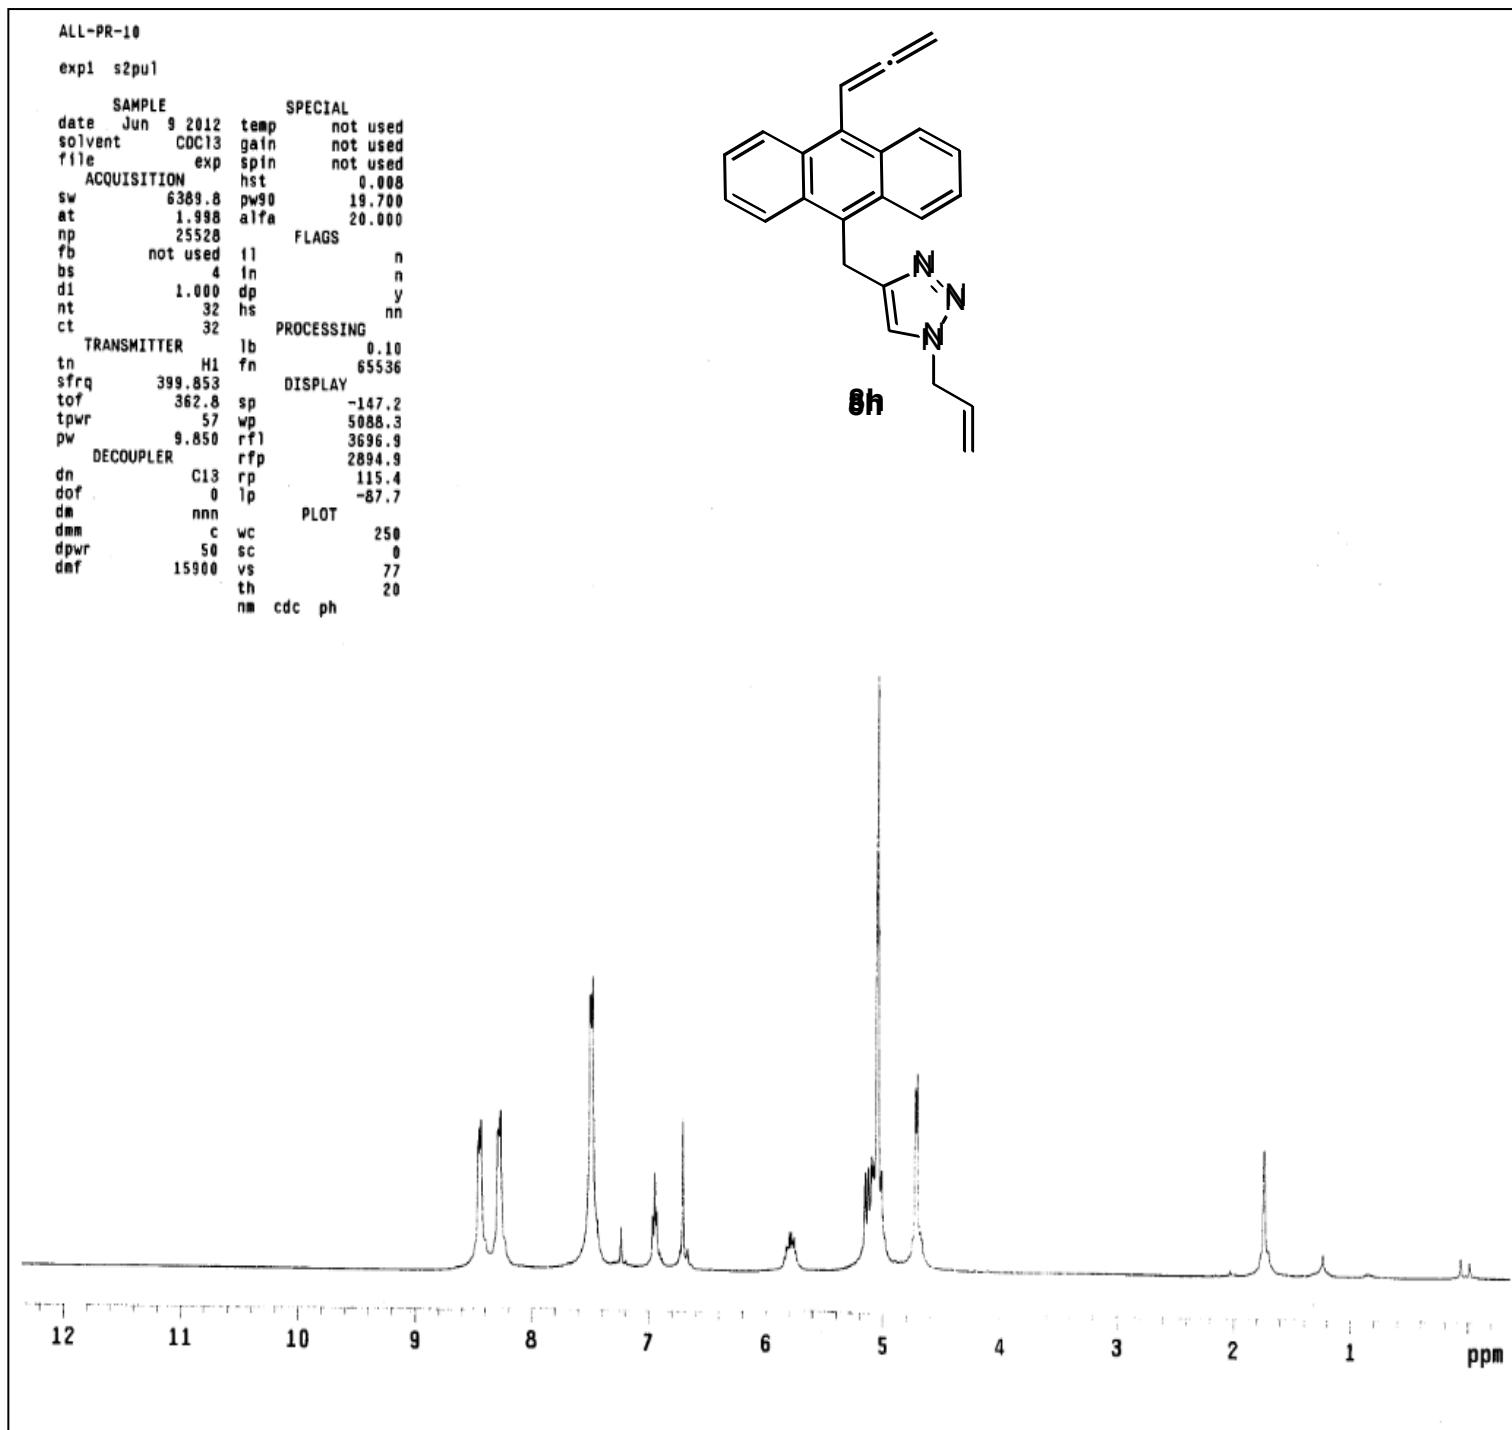

<sup>13</sup>C NMR spectra of **8h**

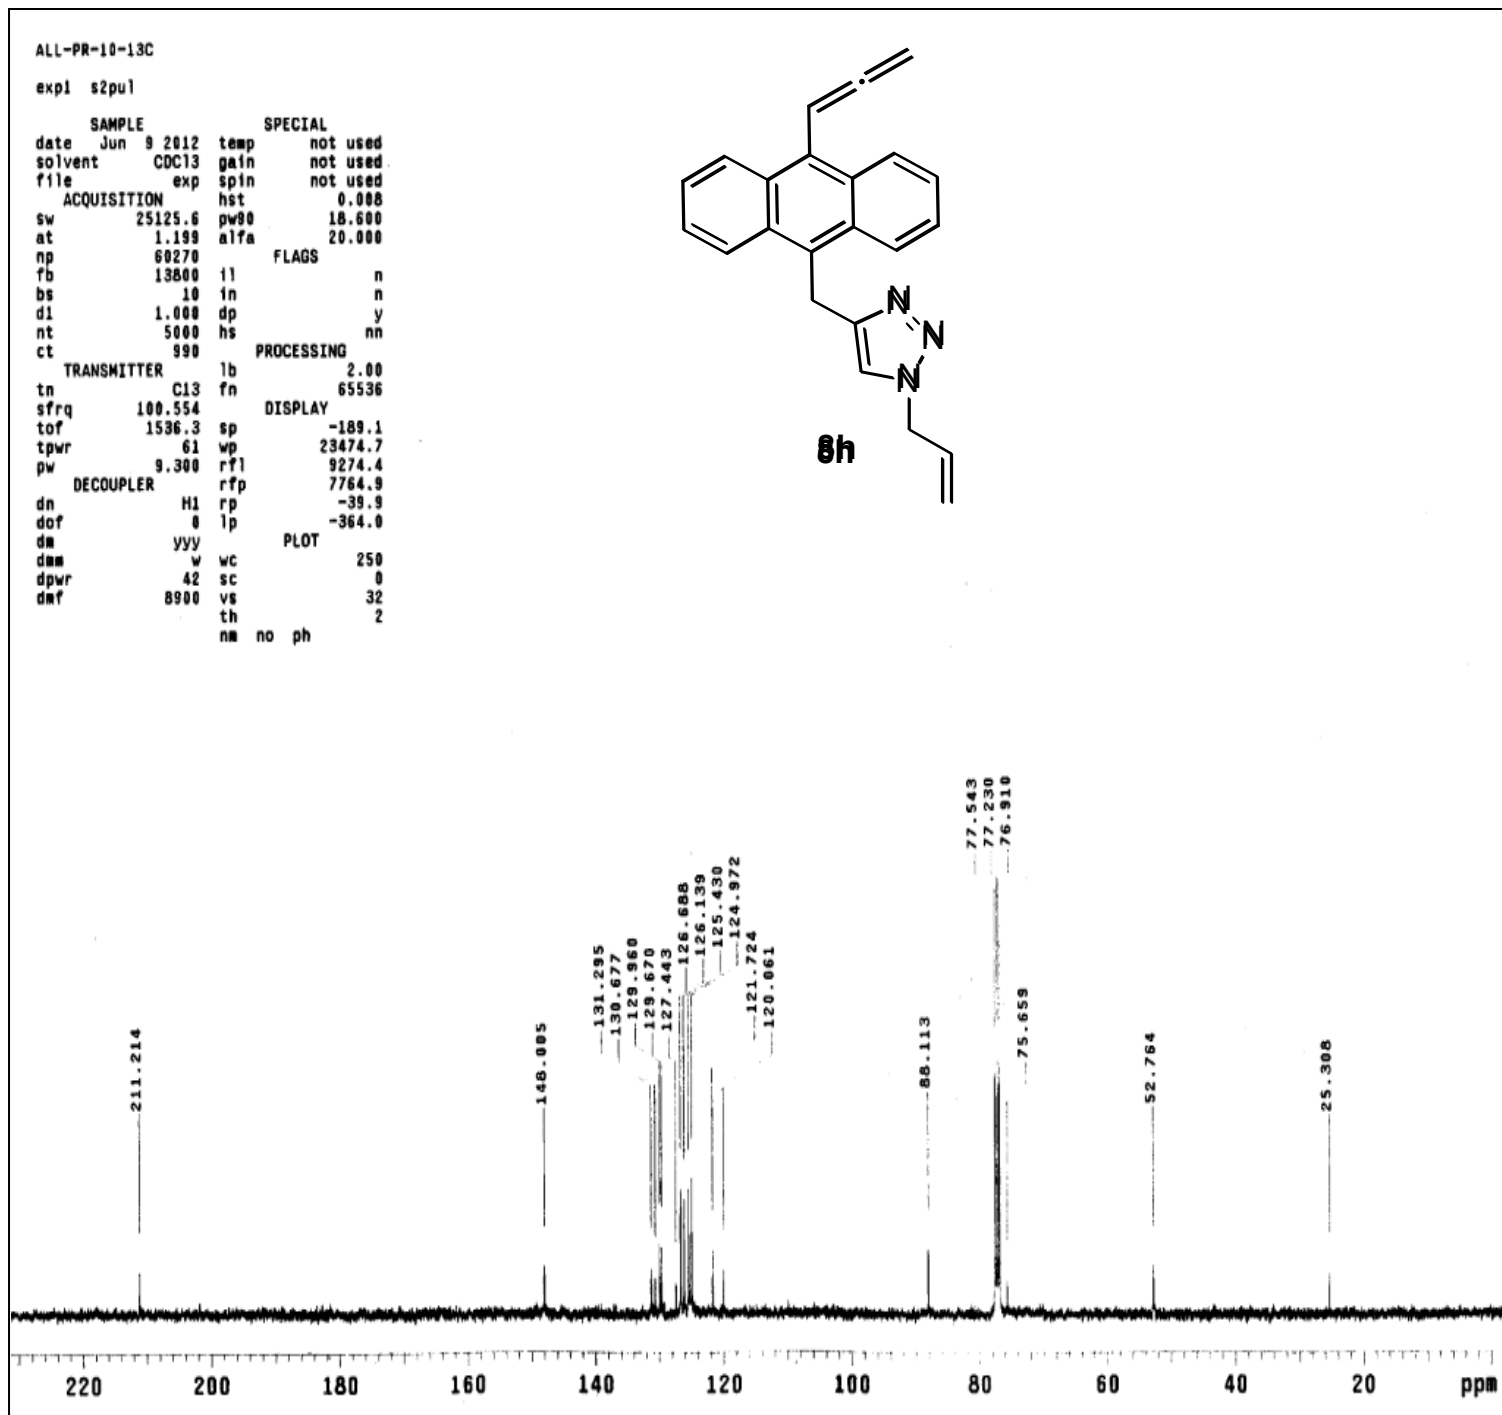

<sup>1</sup>H NMR spectra of **8i**

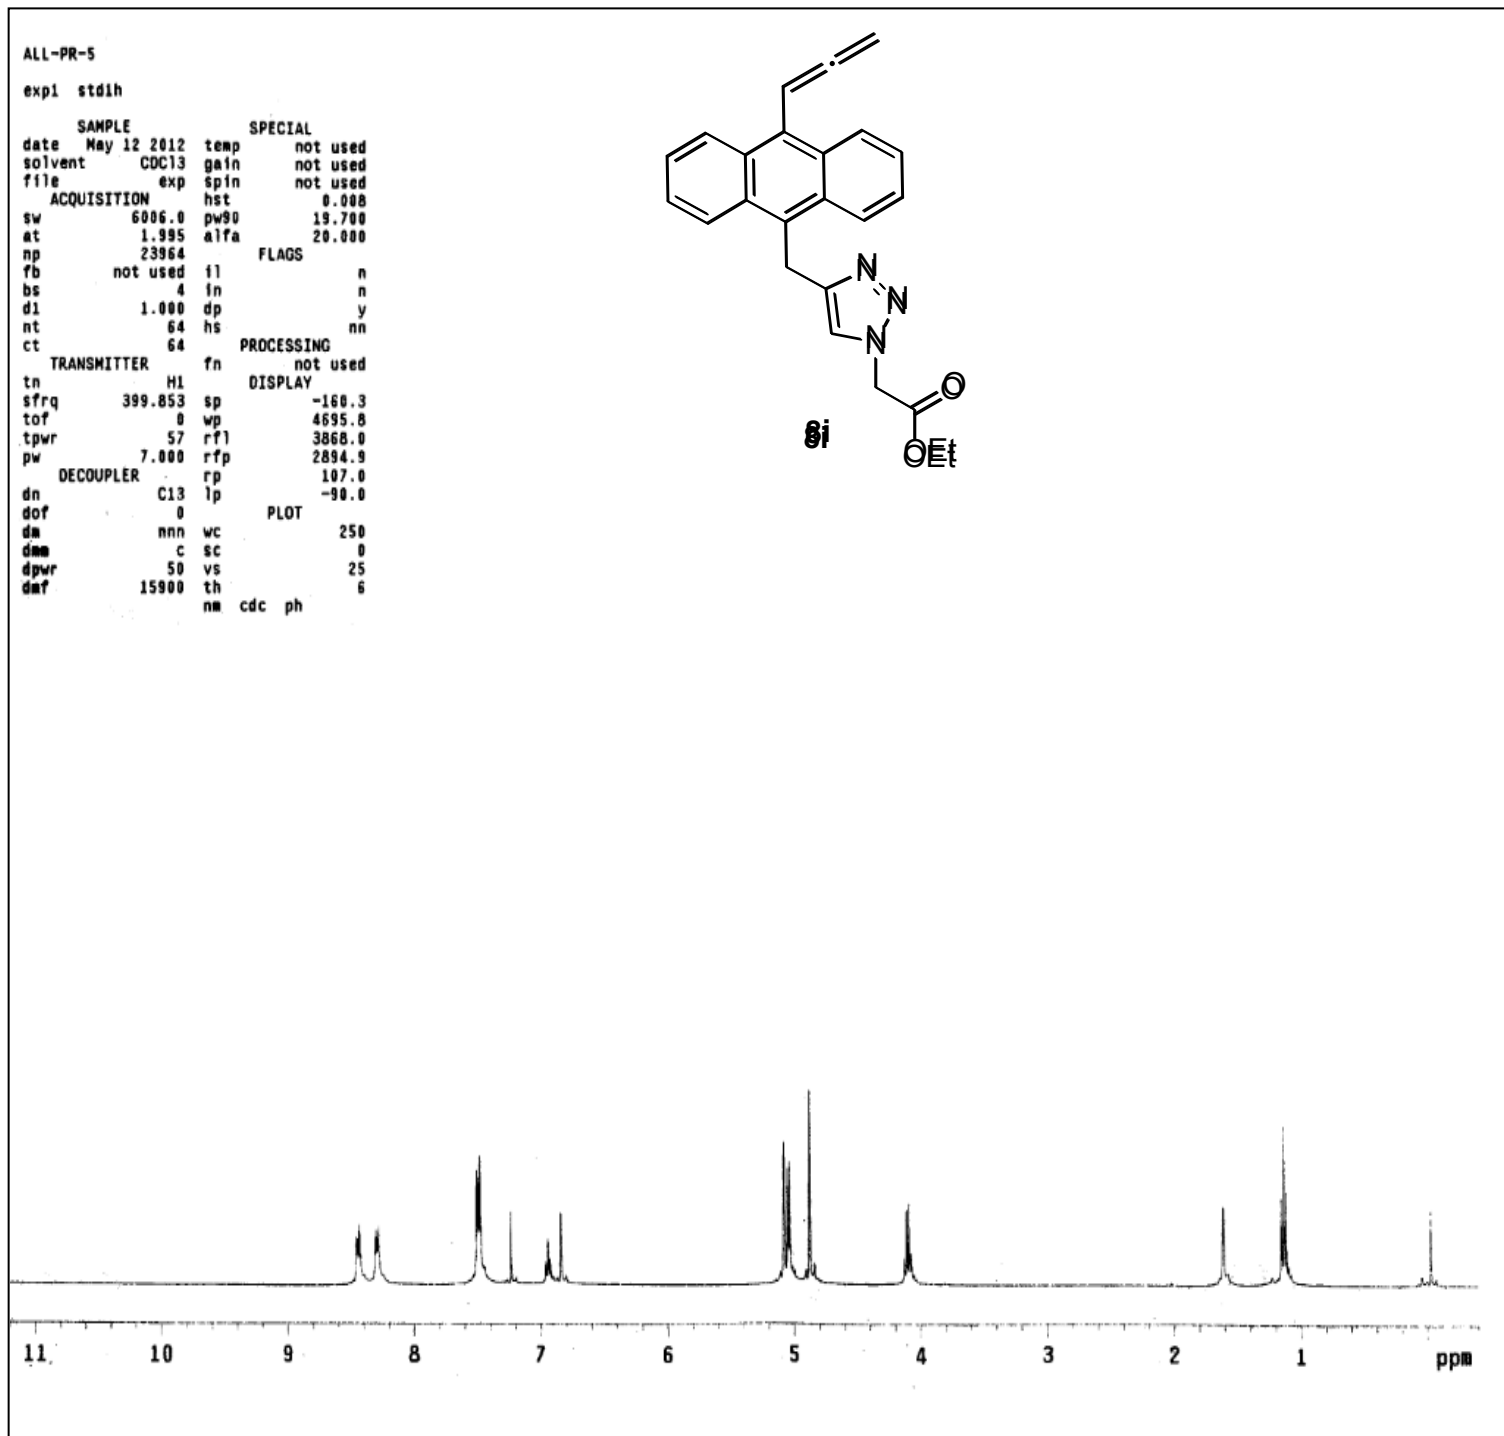

$^{13}\text{C}$  NMR spectra of **8i**

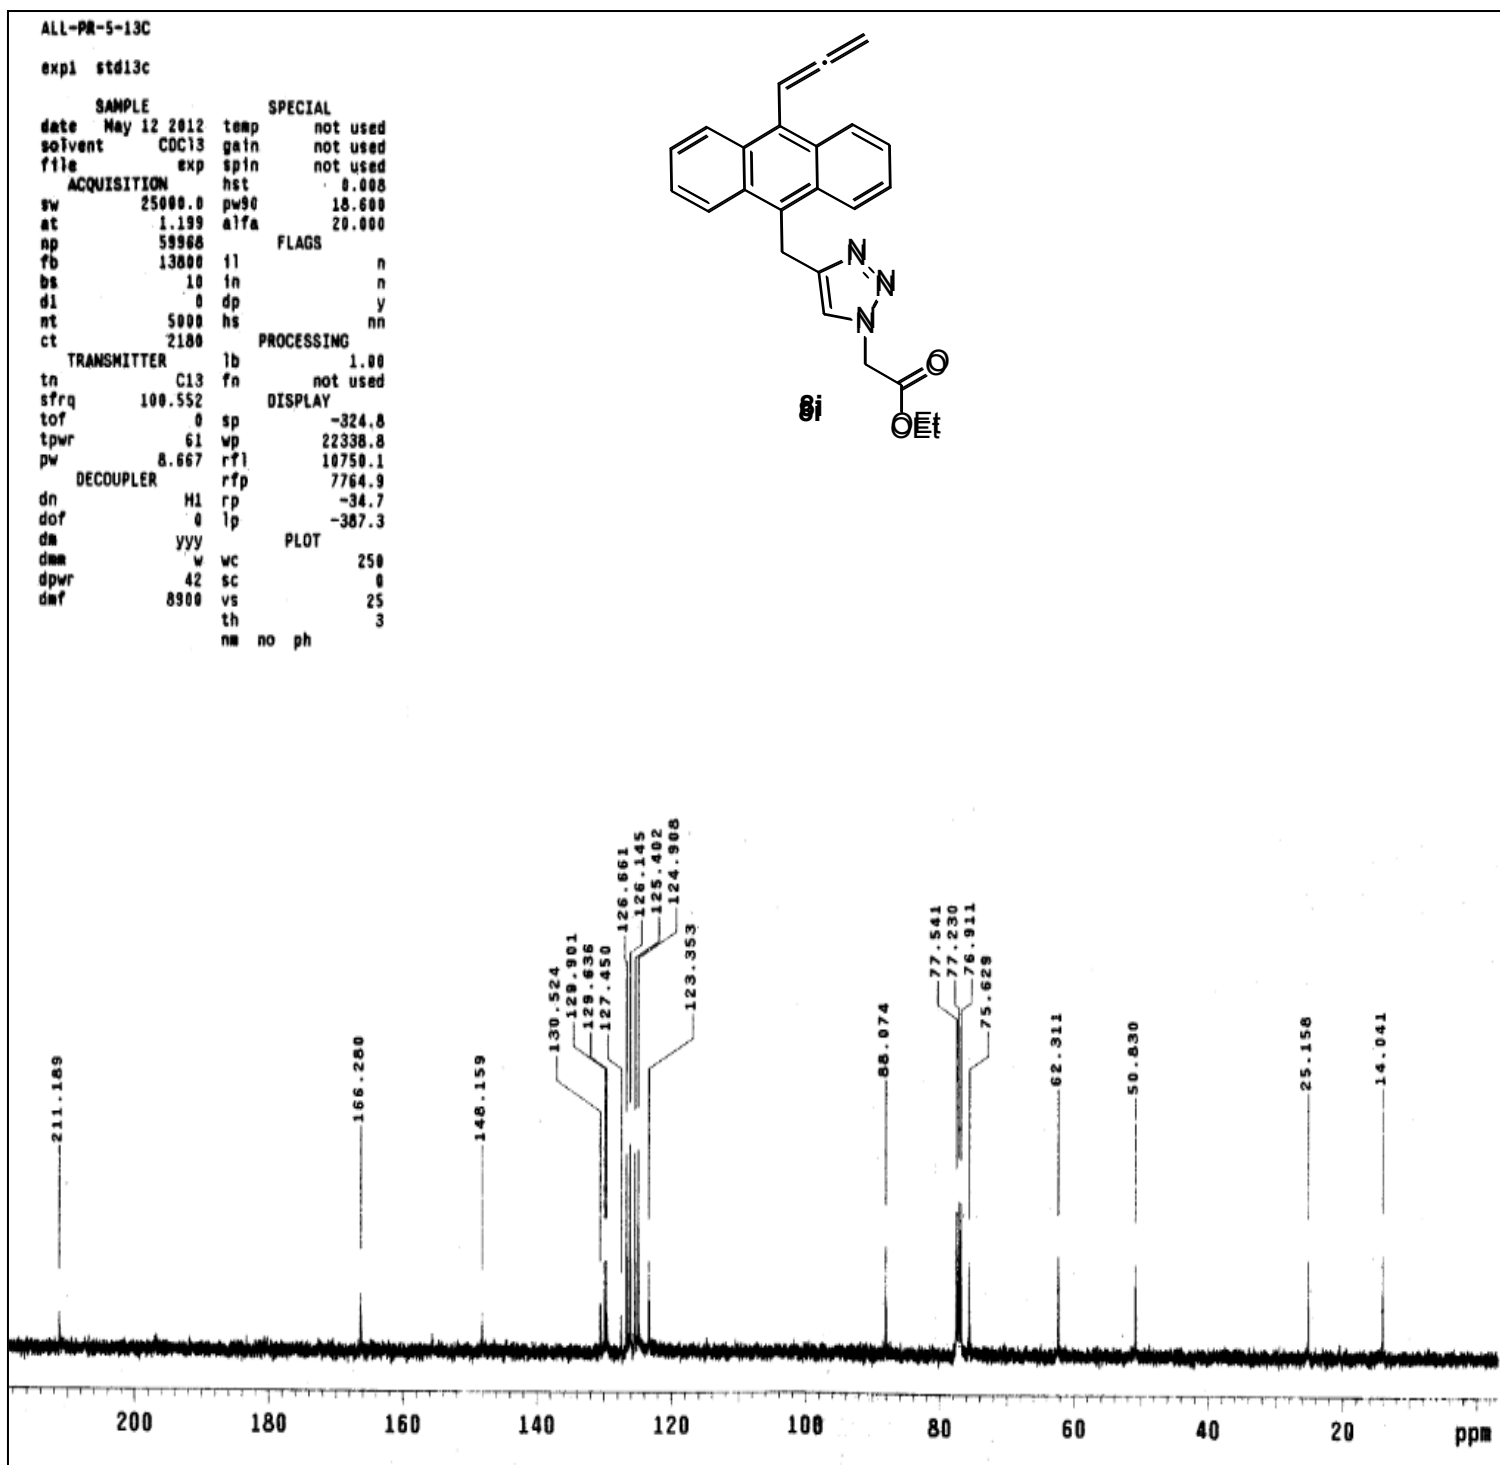

<sup>1</sup>H NMR spectra of **8j**

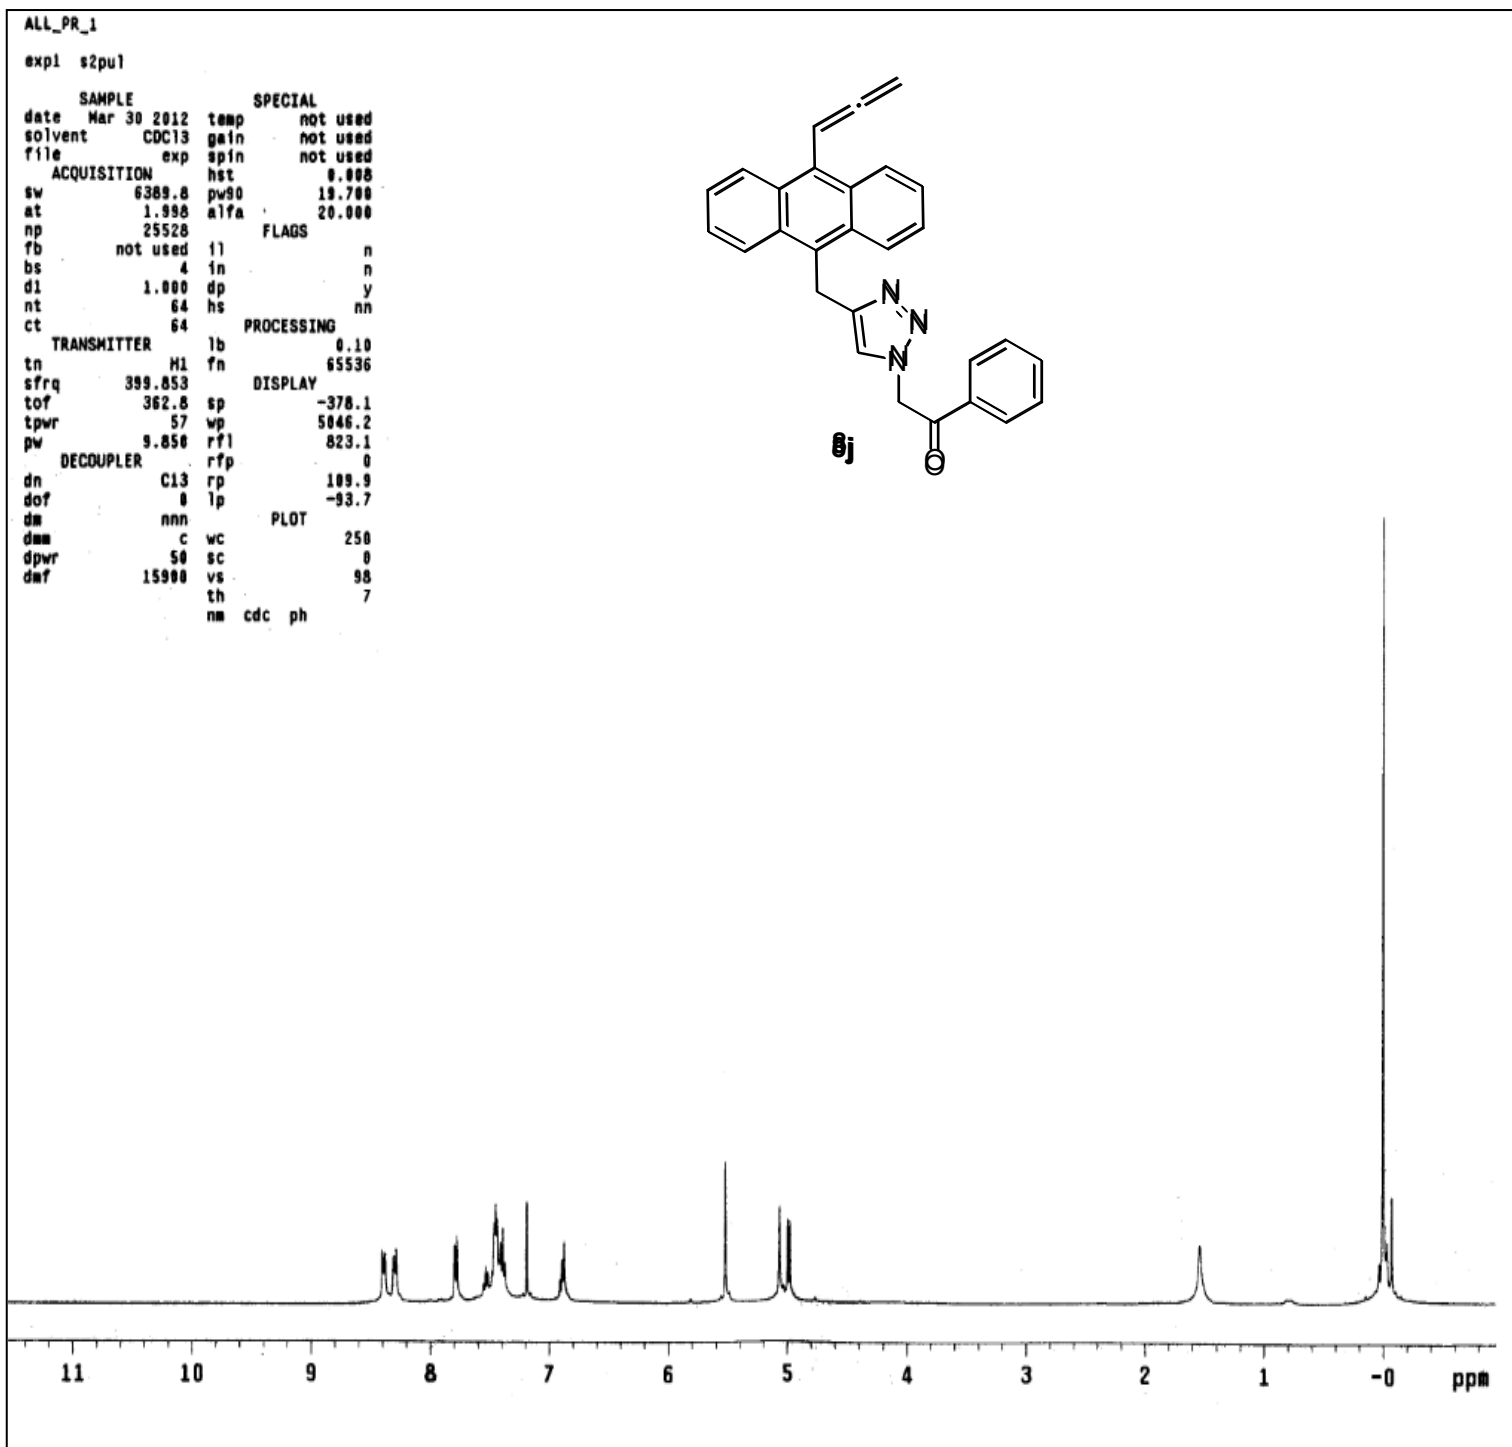



$^{13}\text{C}$  NMR spectra of **8j**

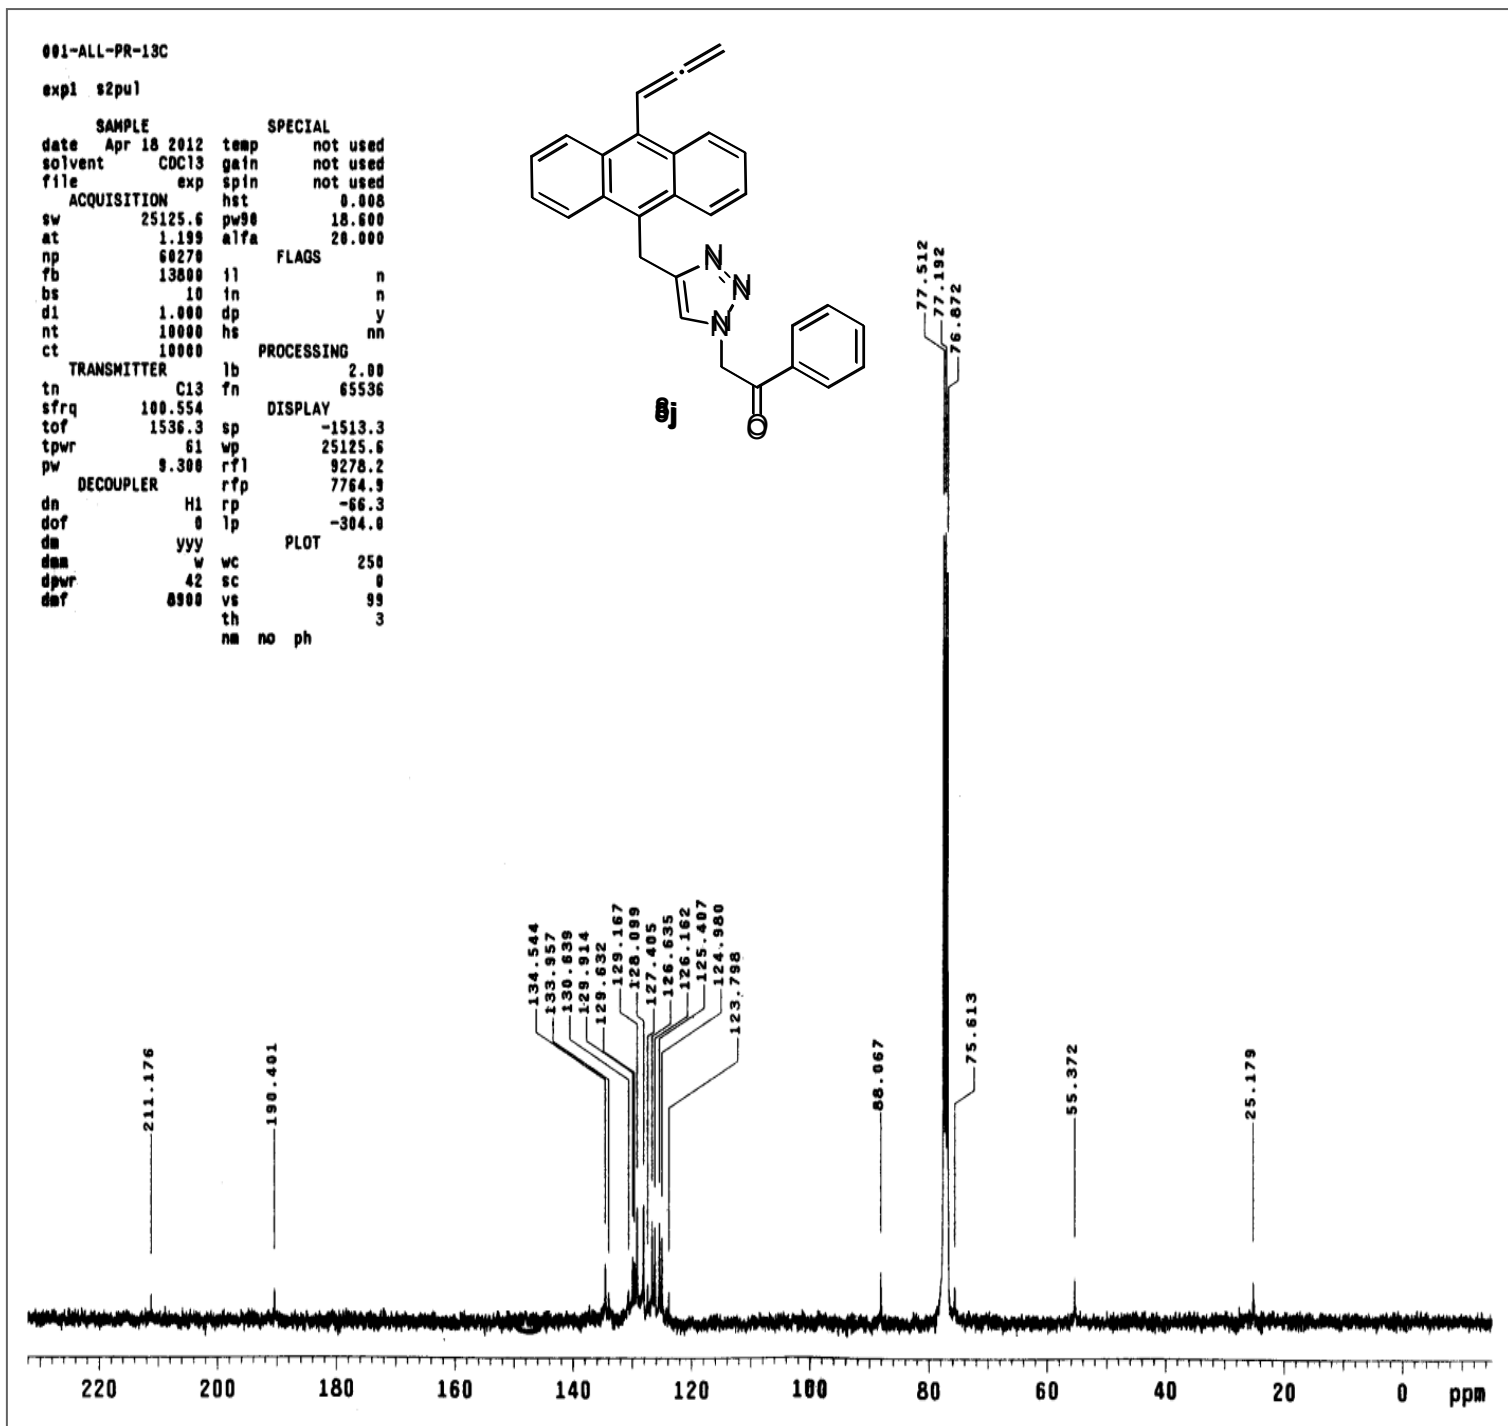

<sup>1</sup>H NMR spectra of 9a

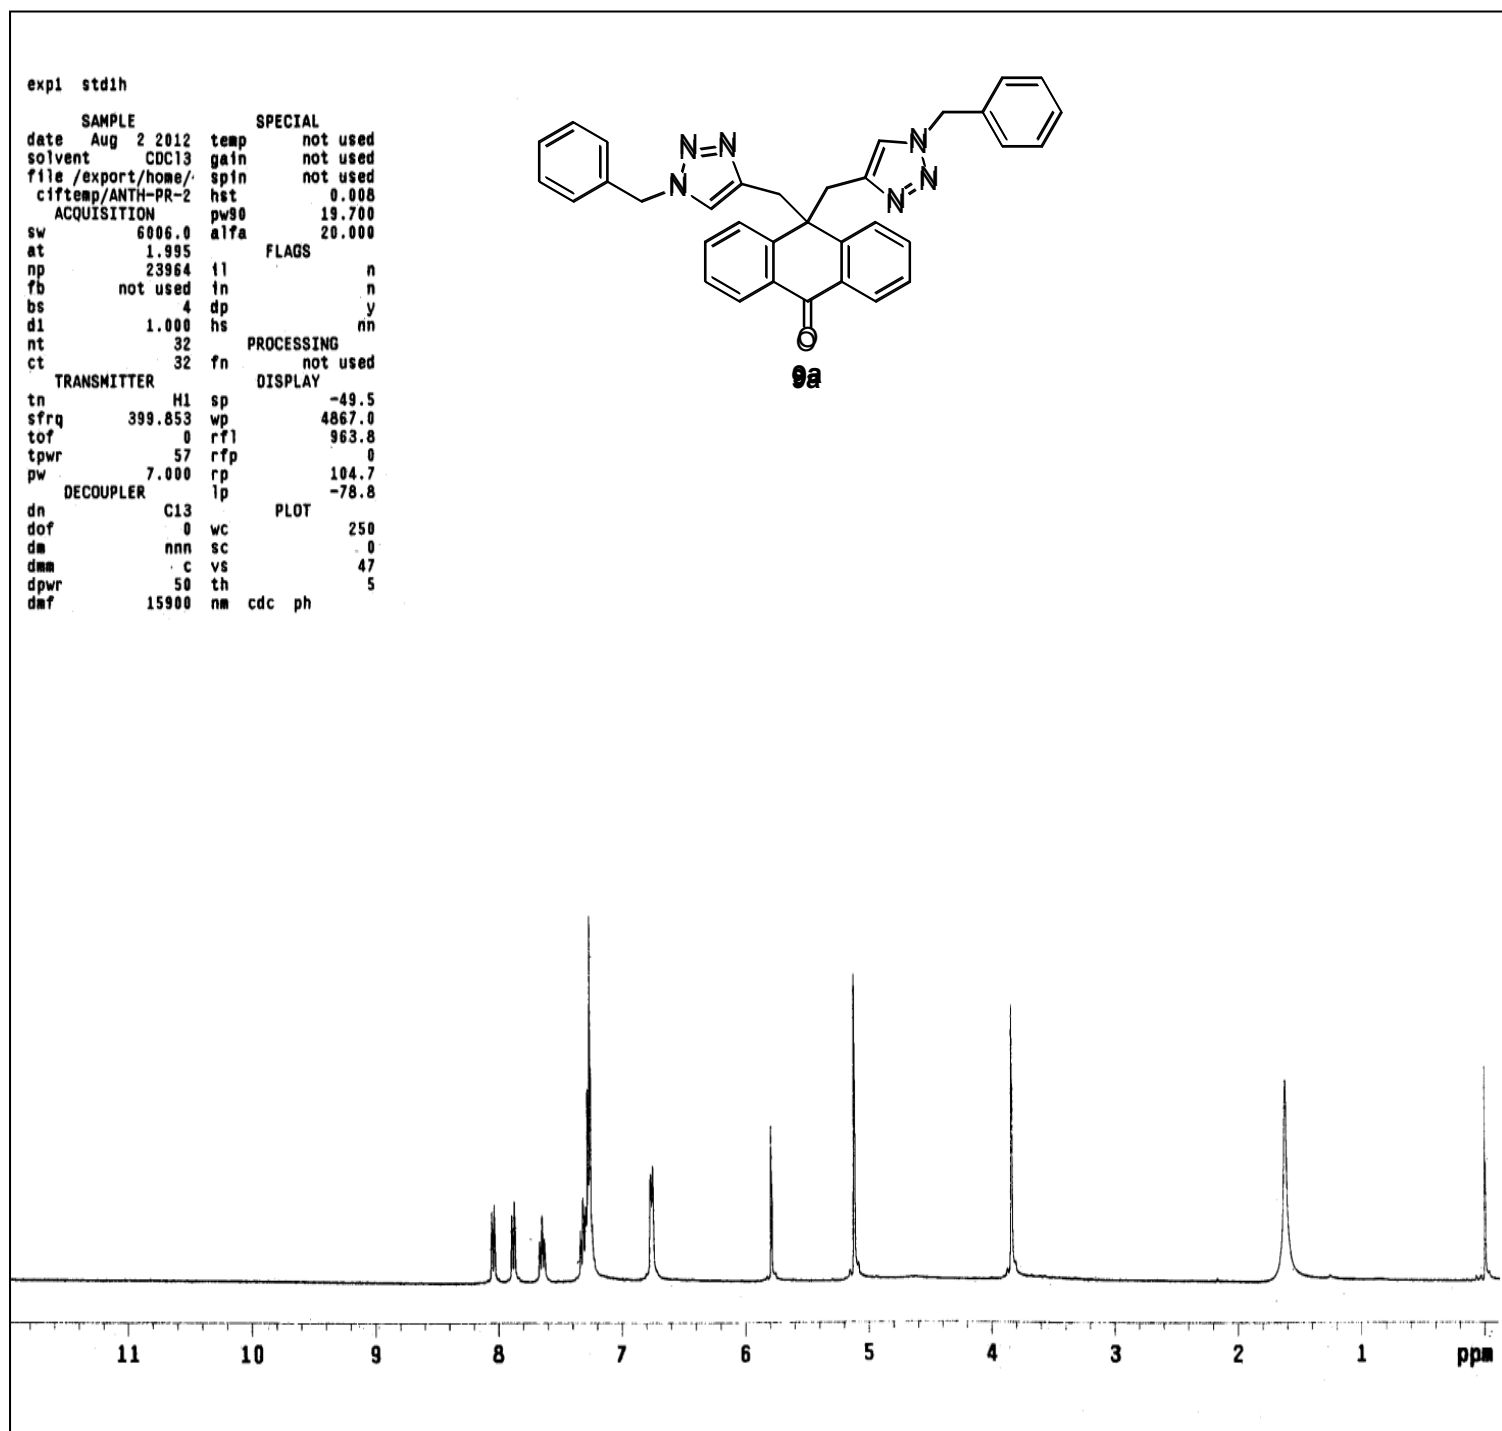

<sup>13</sup>C NMR spectra of 9a

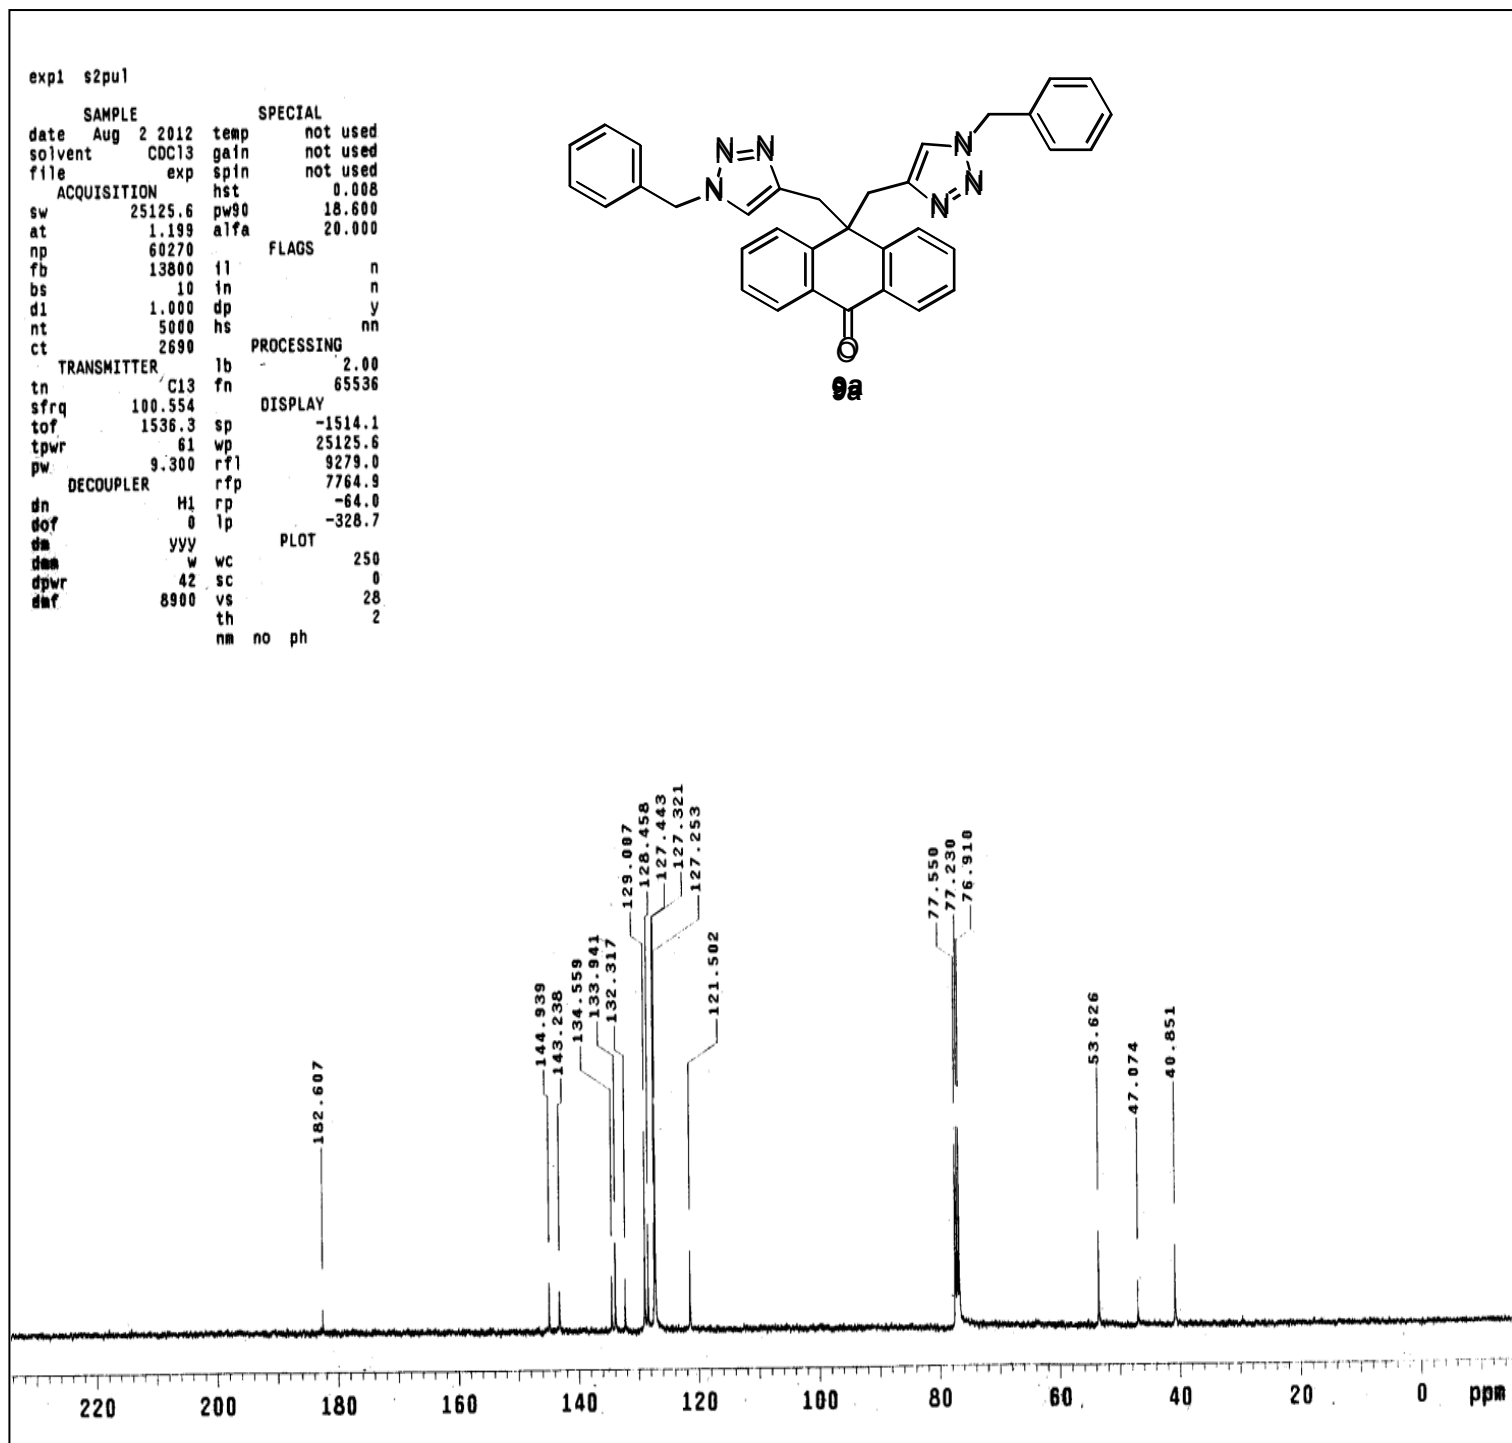

<sup>1</sup>H NMR spectra of **9b**

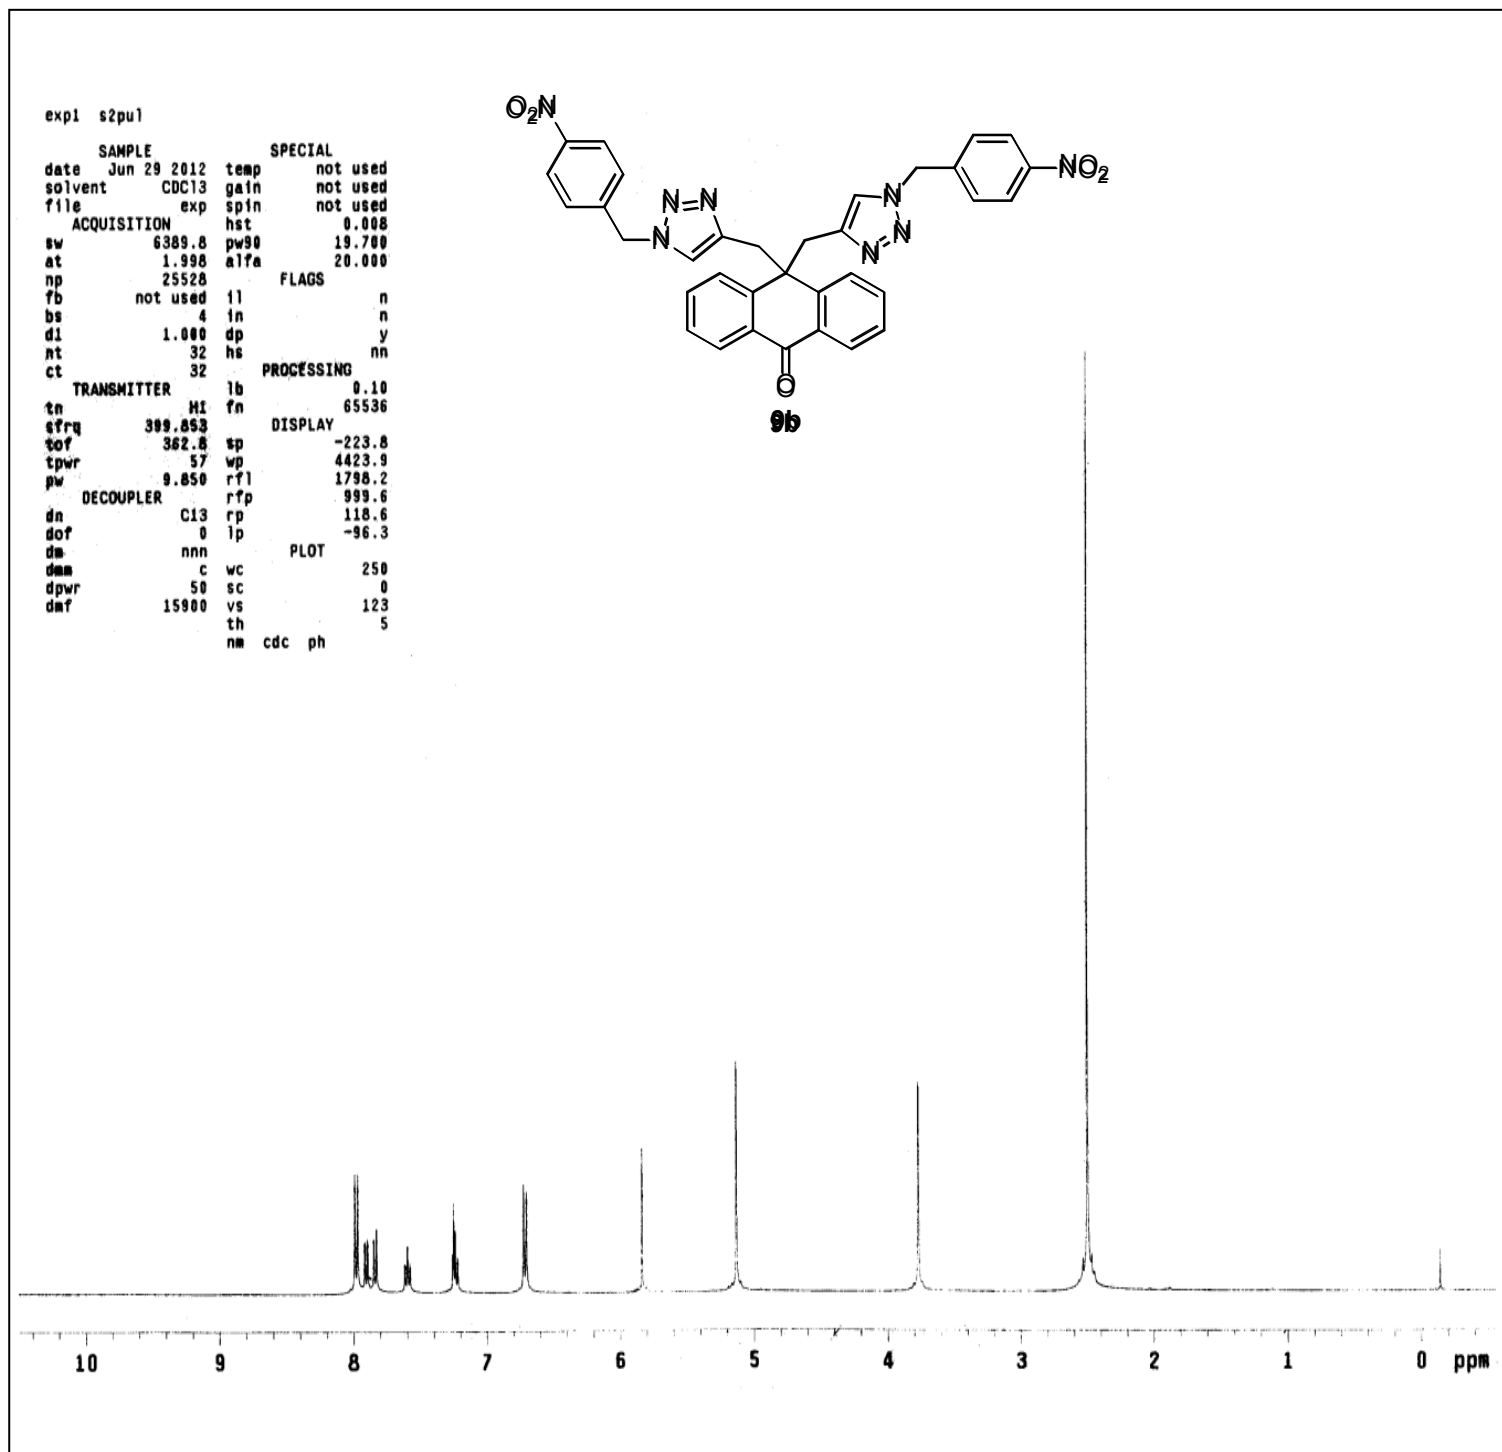

<sup>13</sup>C NMR spectra of 9b

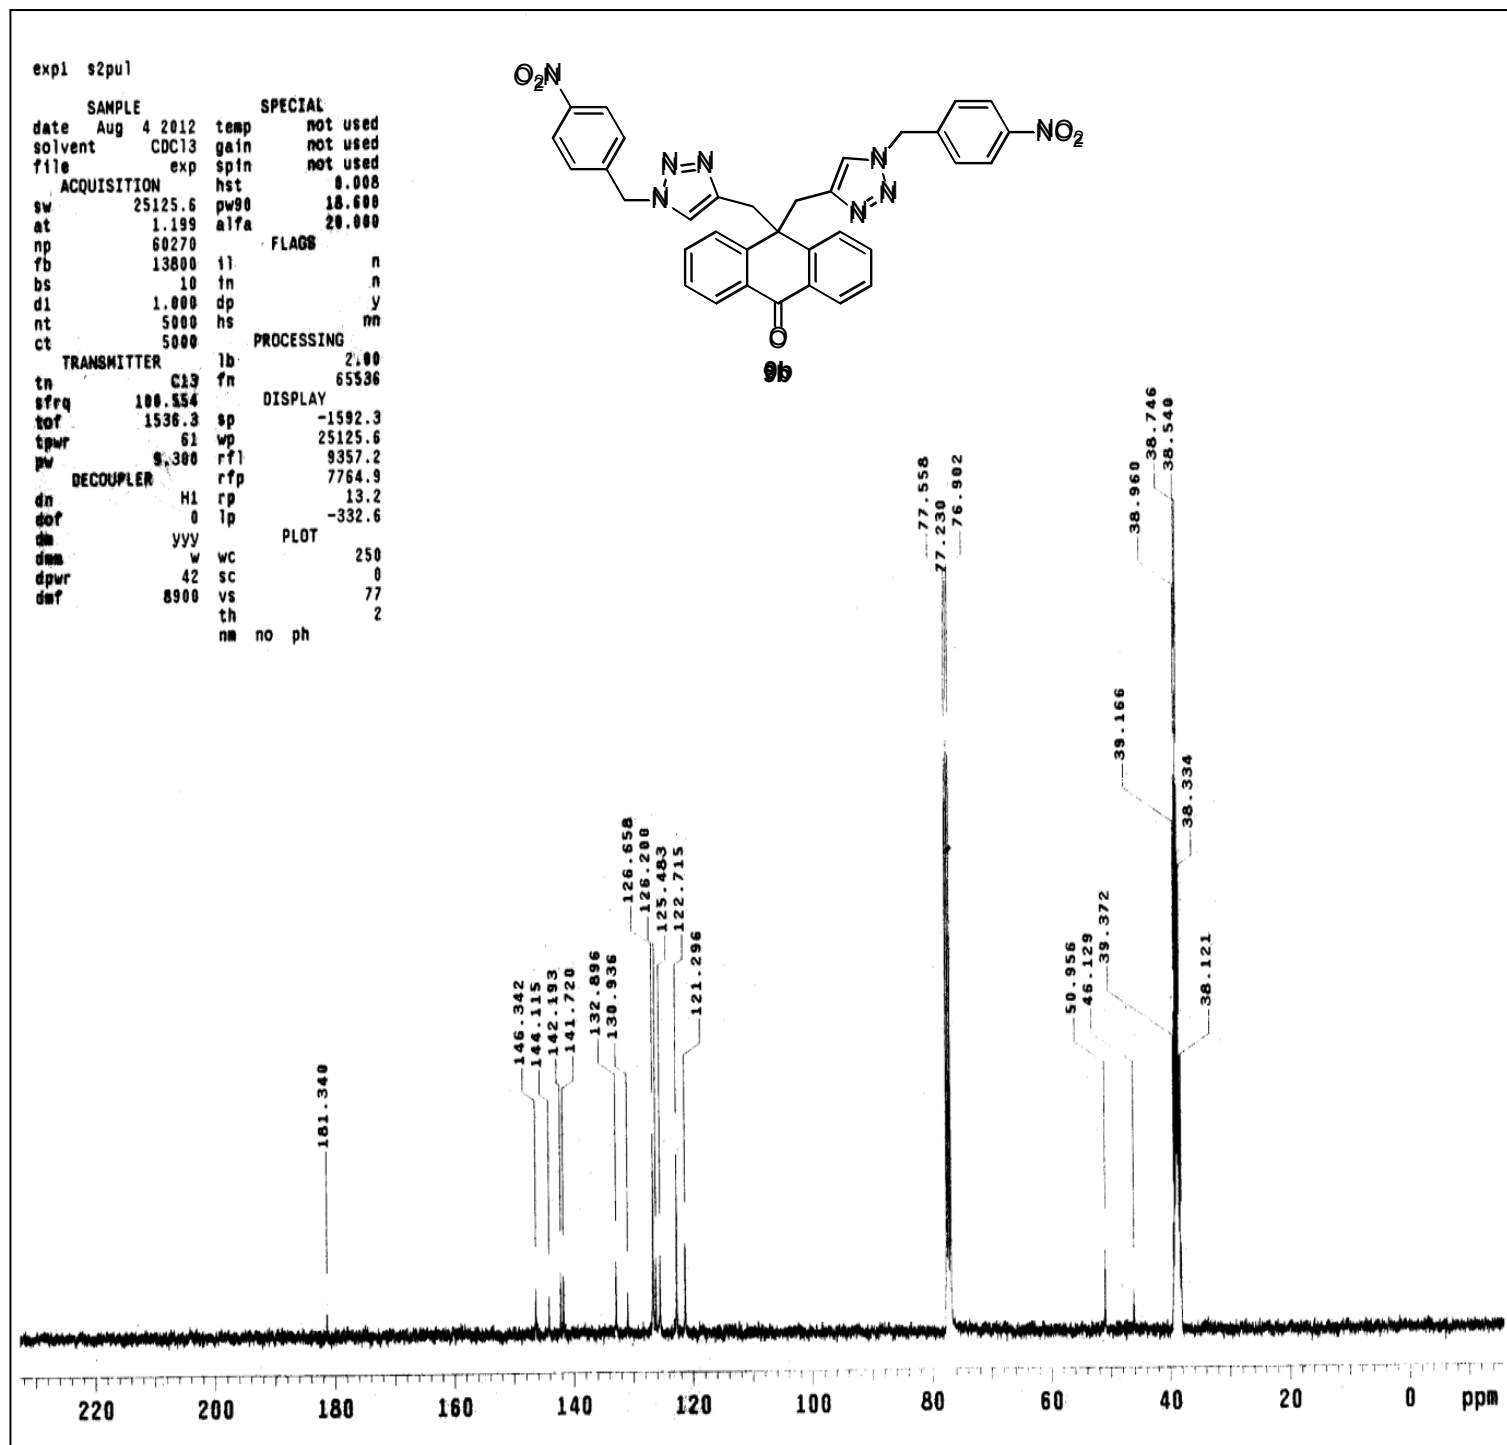

<sup>1</sup>H NMR spectra of 9c

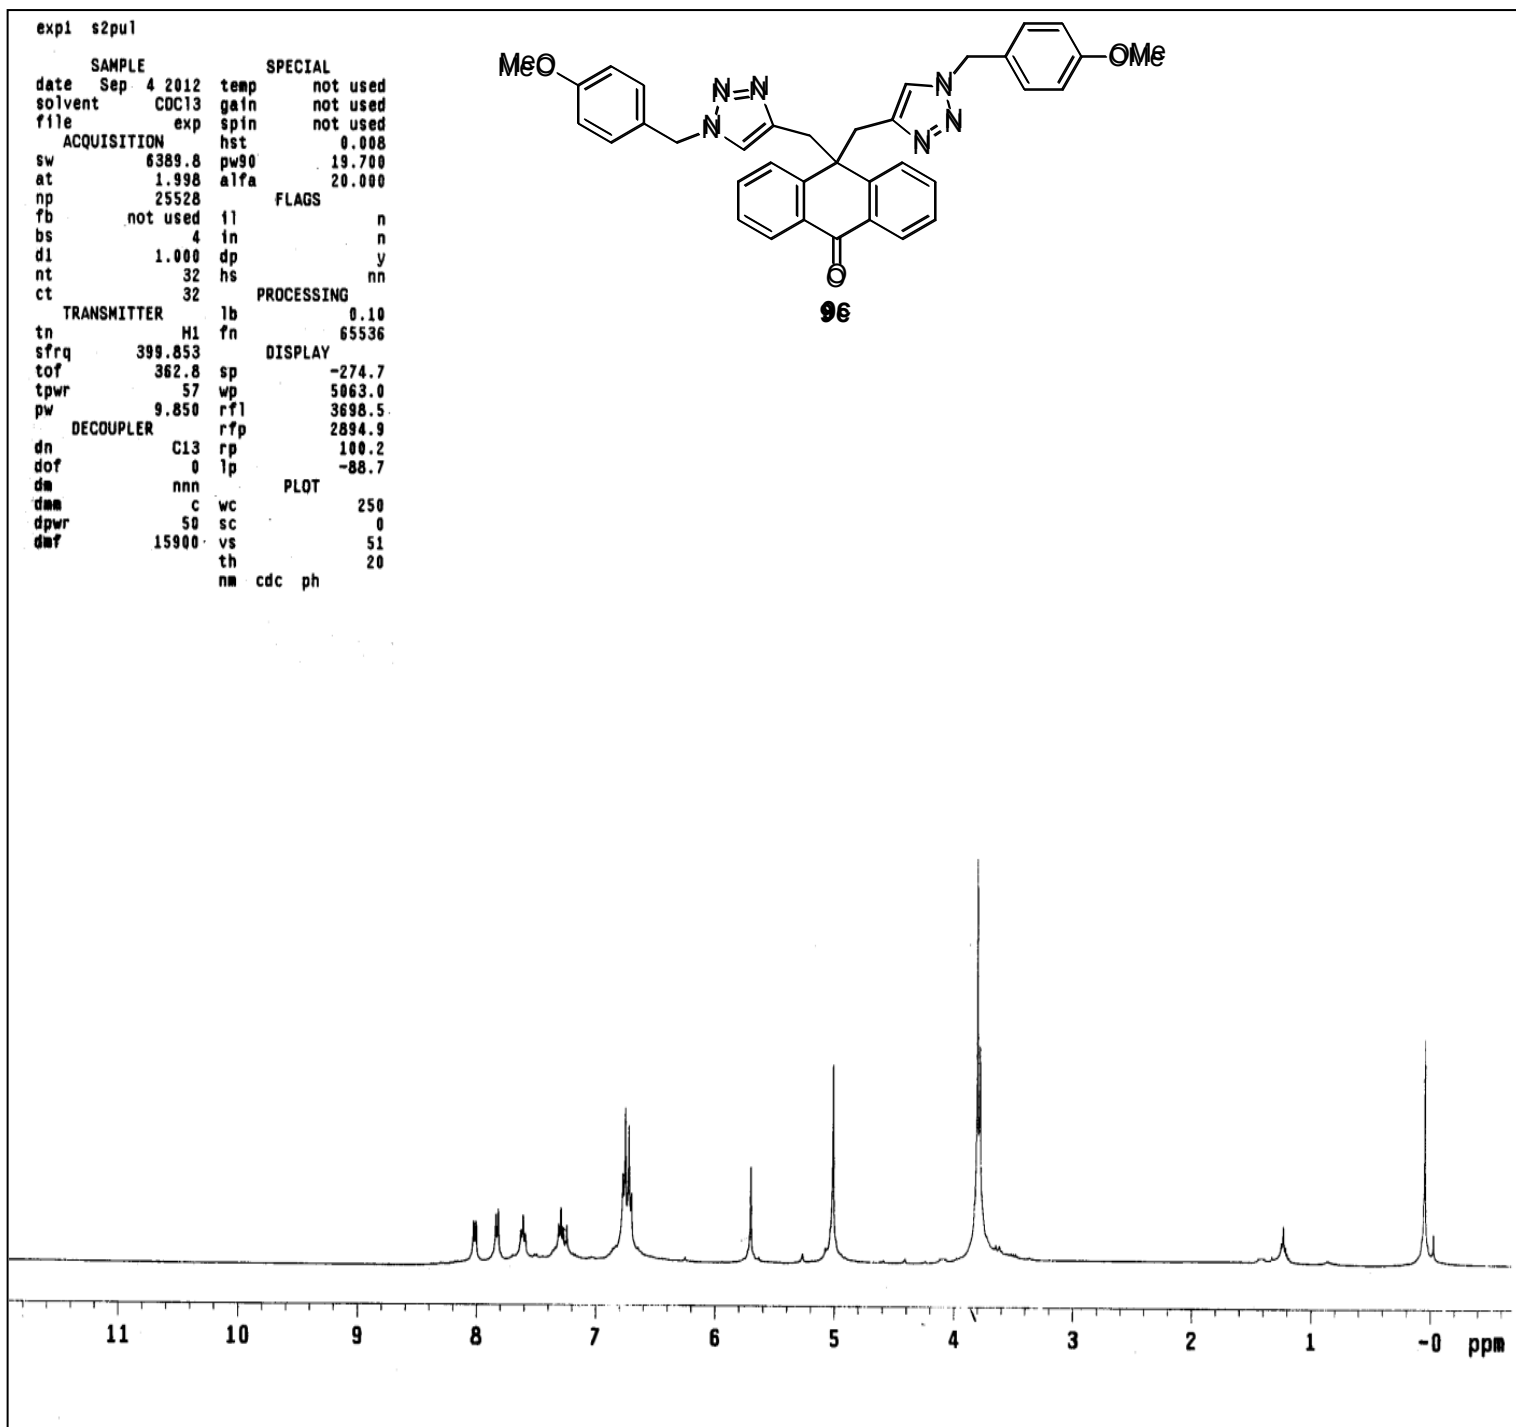

$^{13}\text{C}$  NMR spectra of **9c**

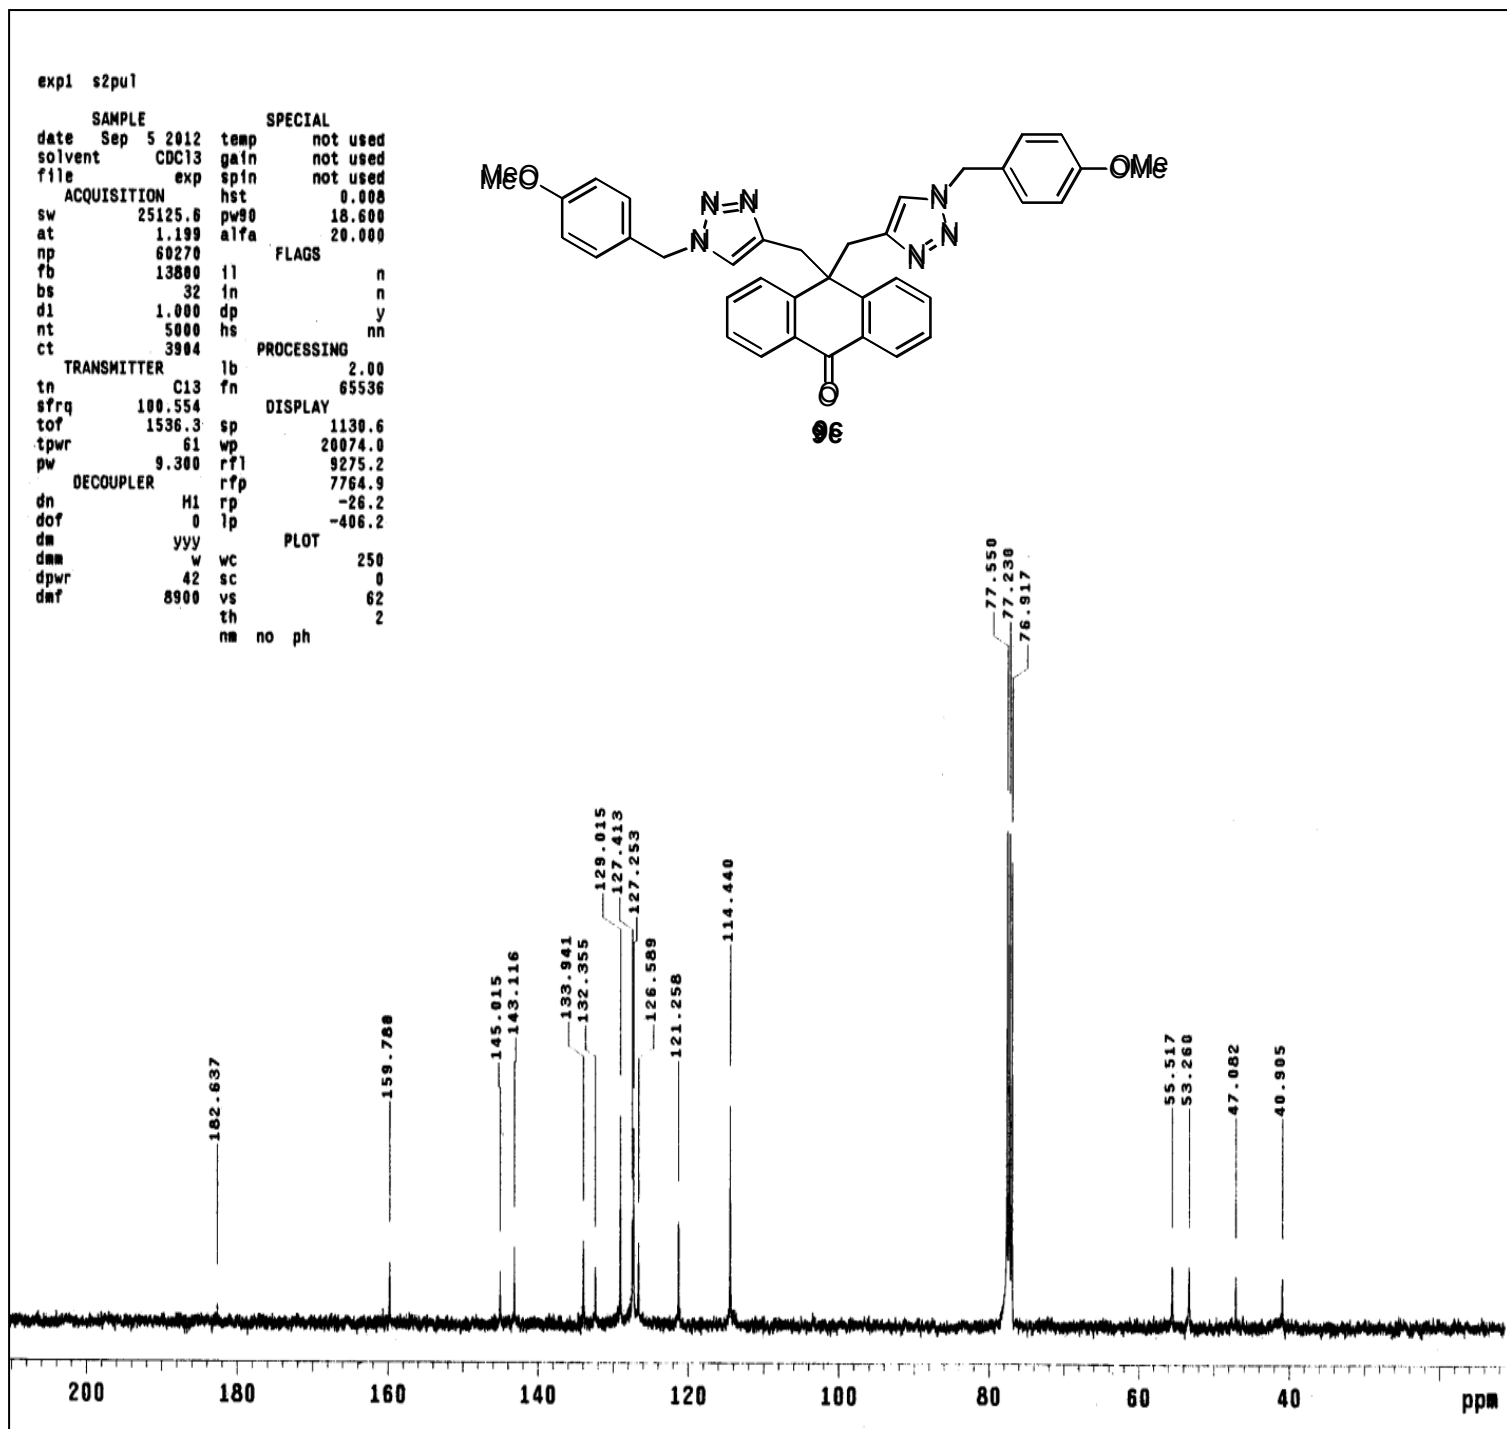

<sup>1</sup>H NMR spectra of **9d**

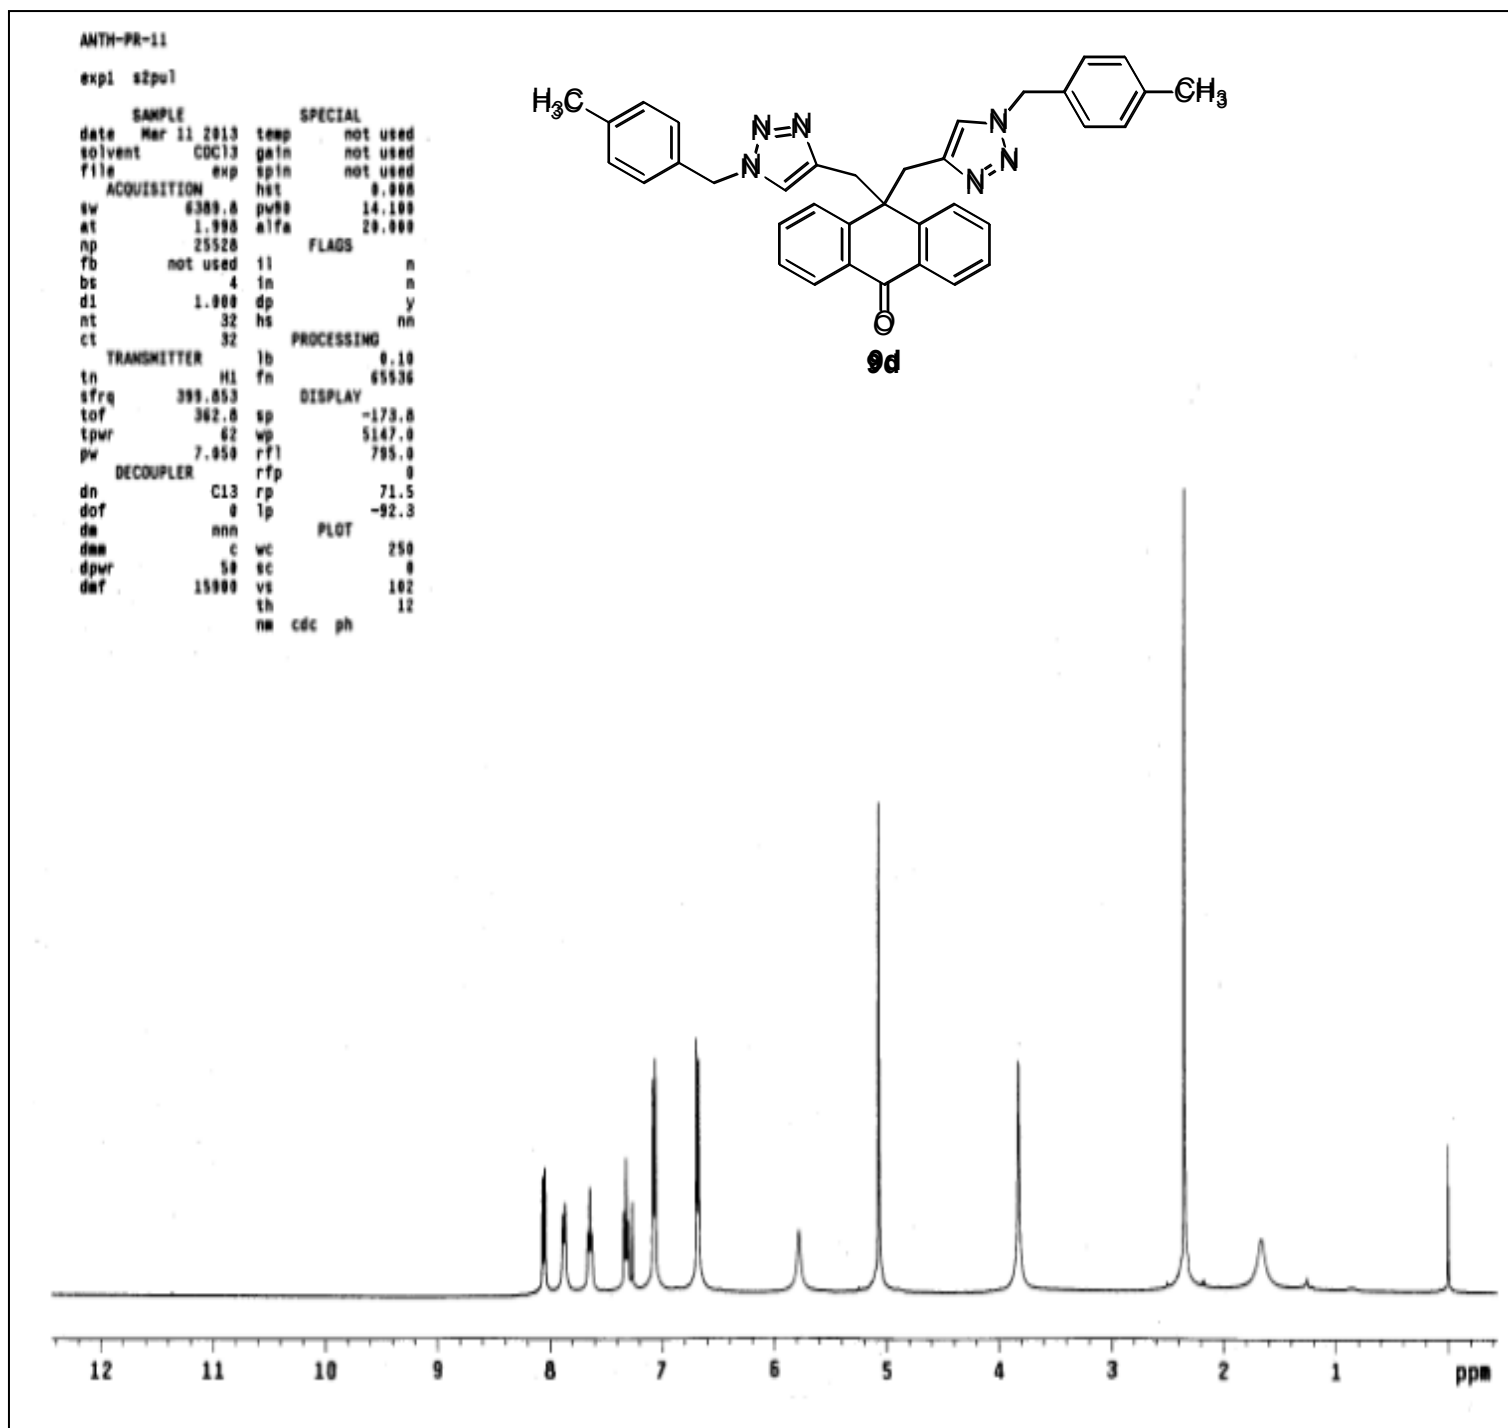



<sup>13</sup>C NMR spectra of 9d

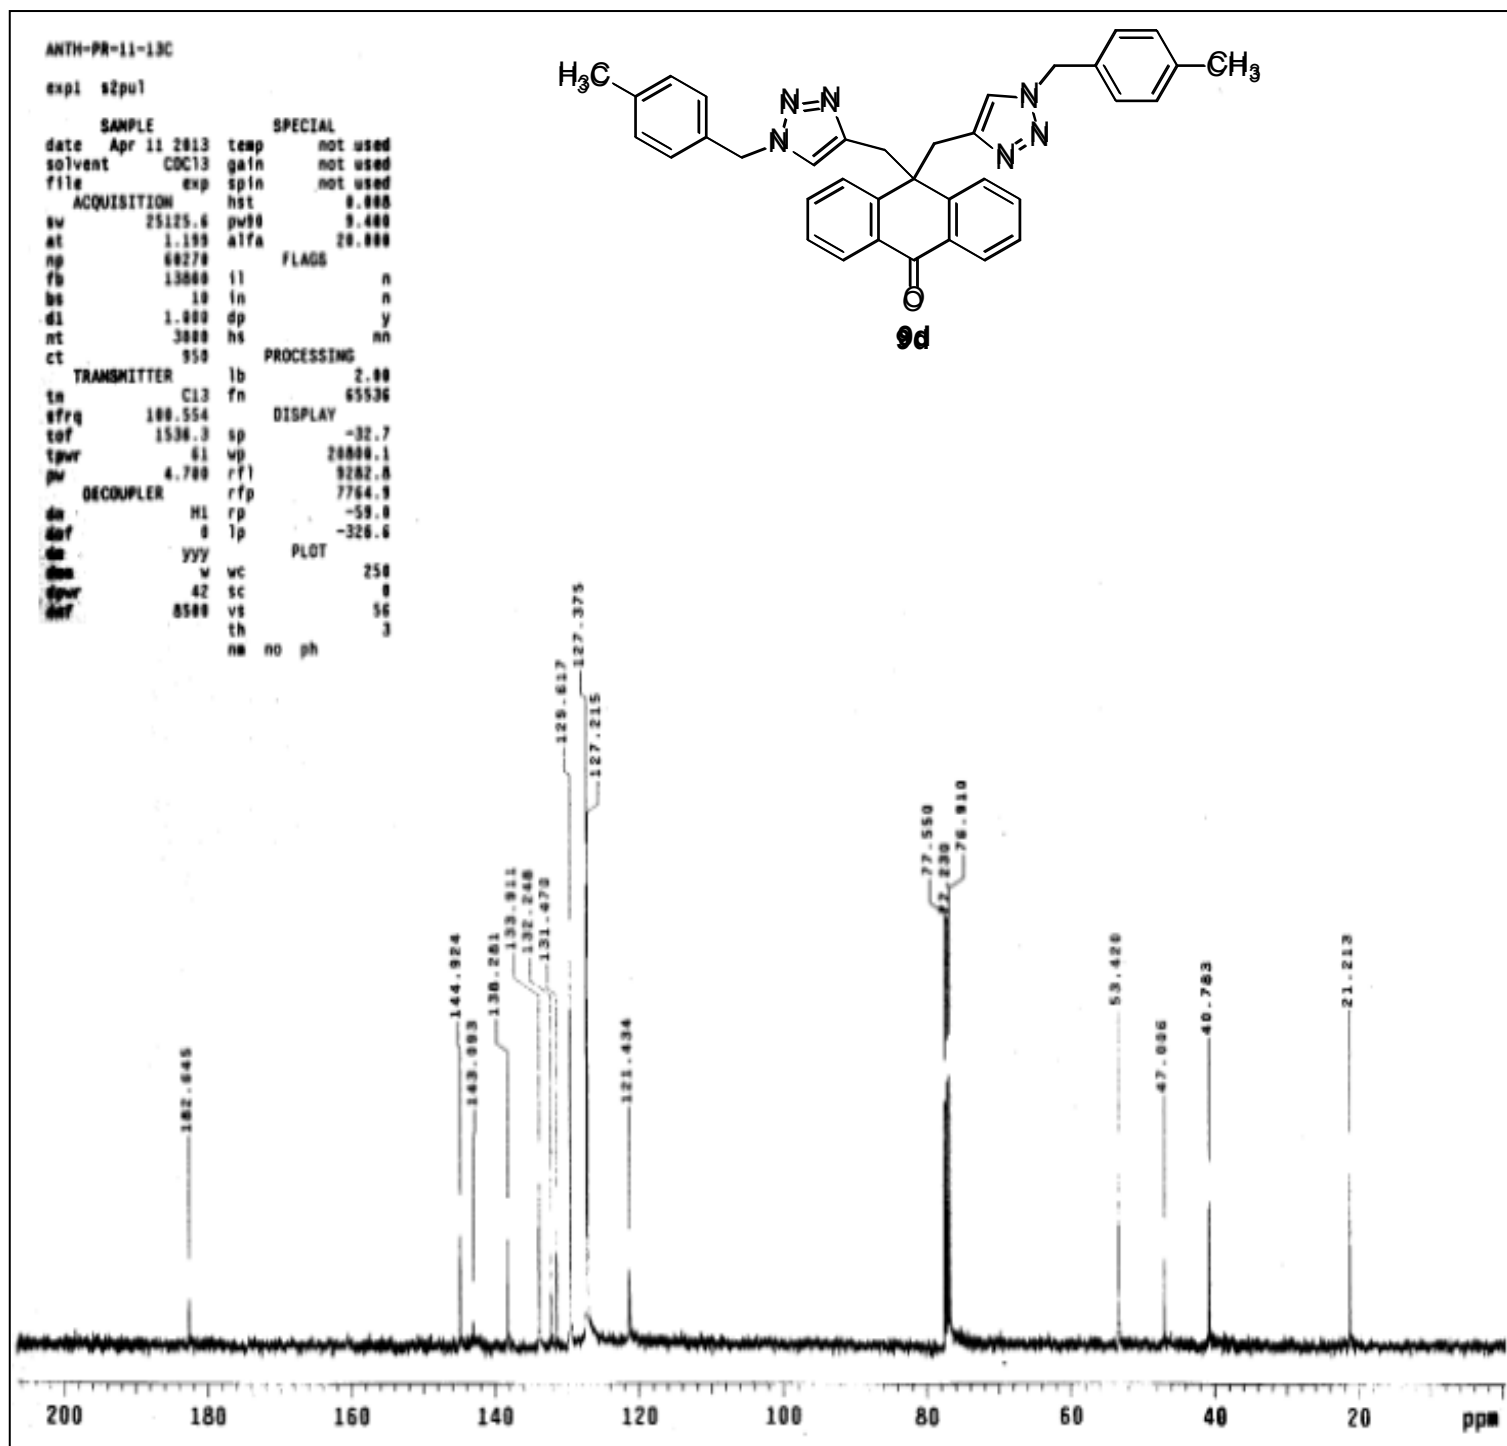



$^{13}\text{C}$  NMR spectra of **9e**

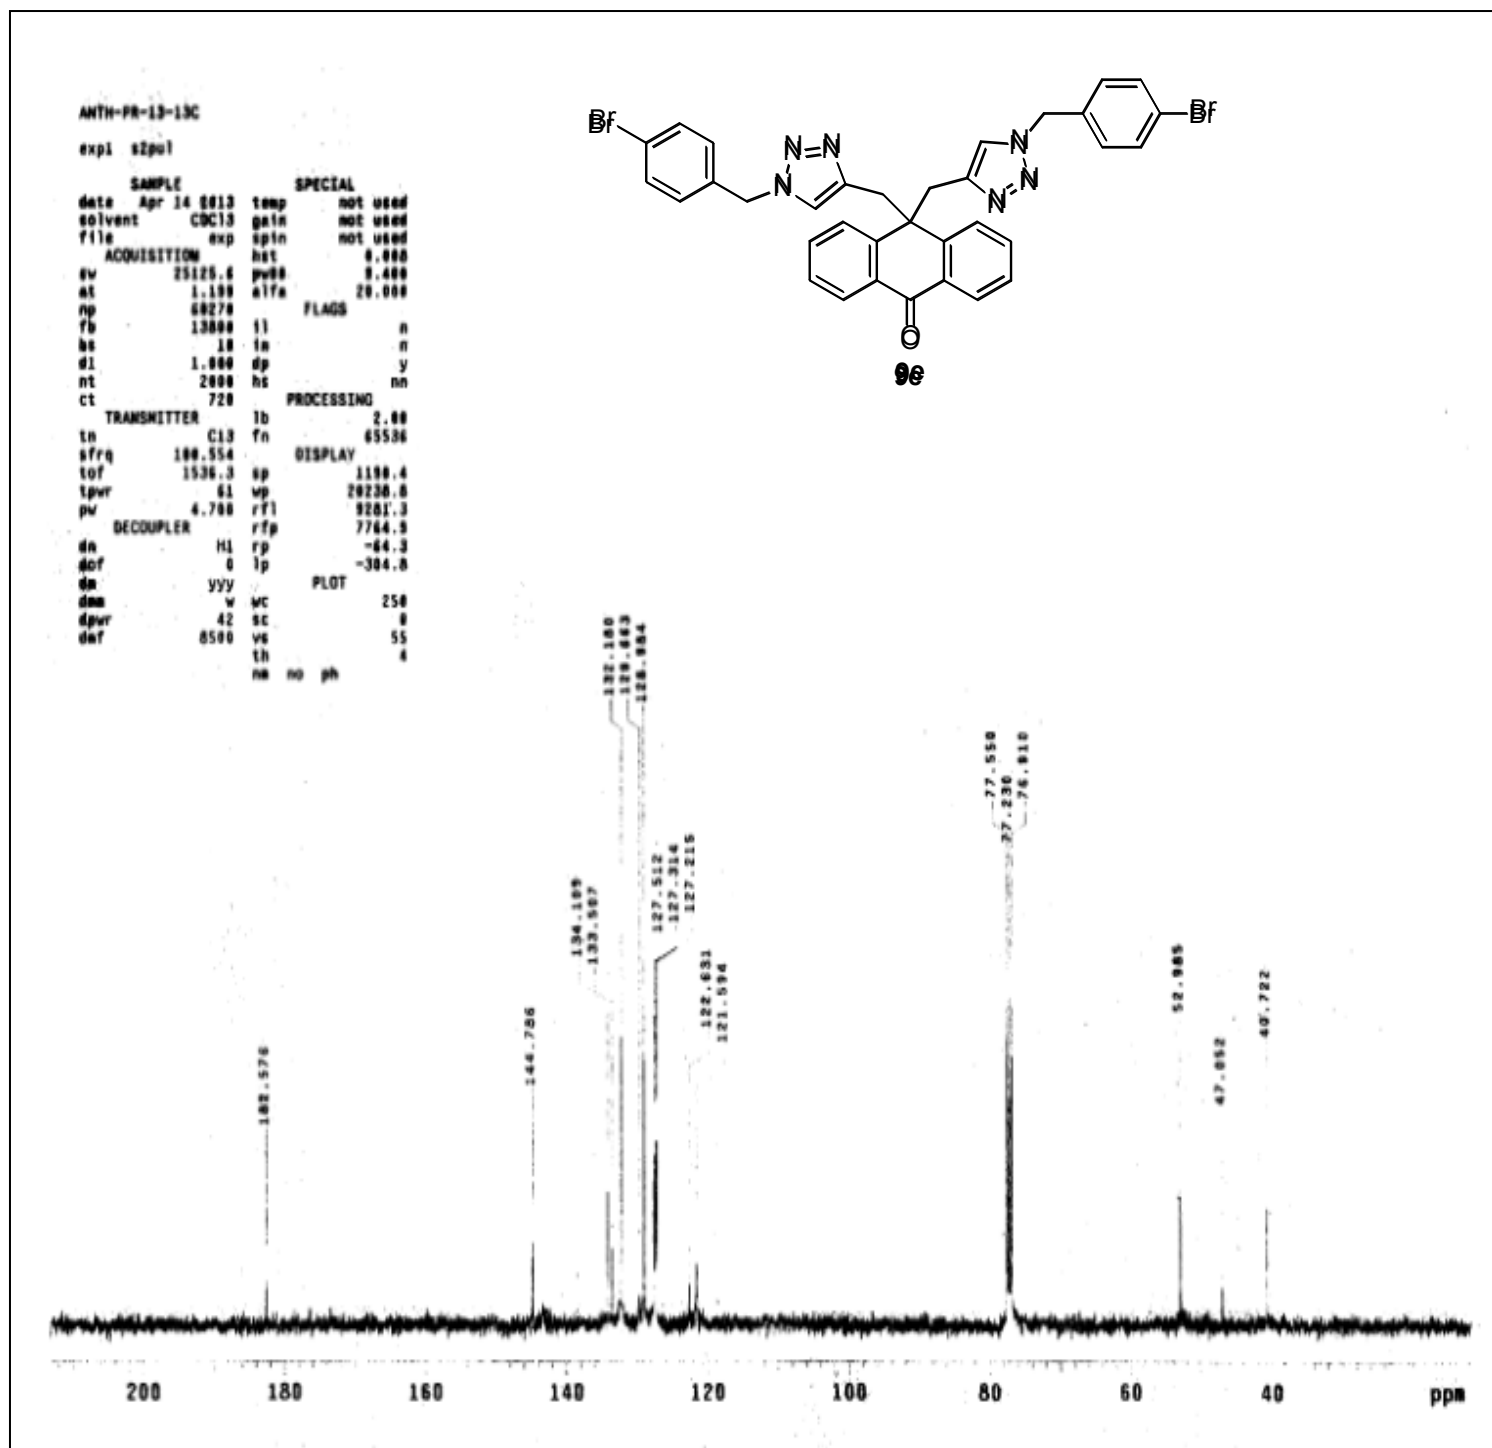

<sup>1</sup>H NMR spectra of 9f

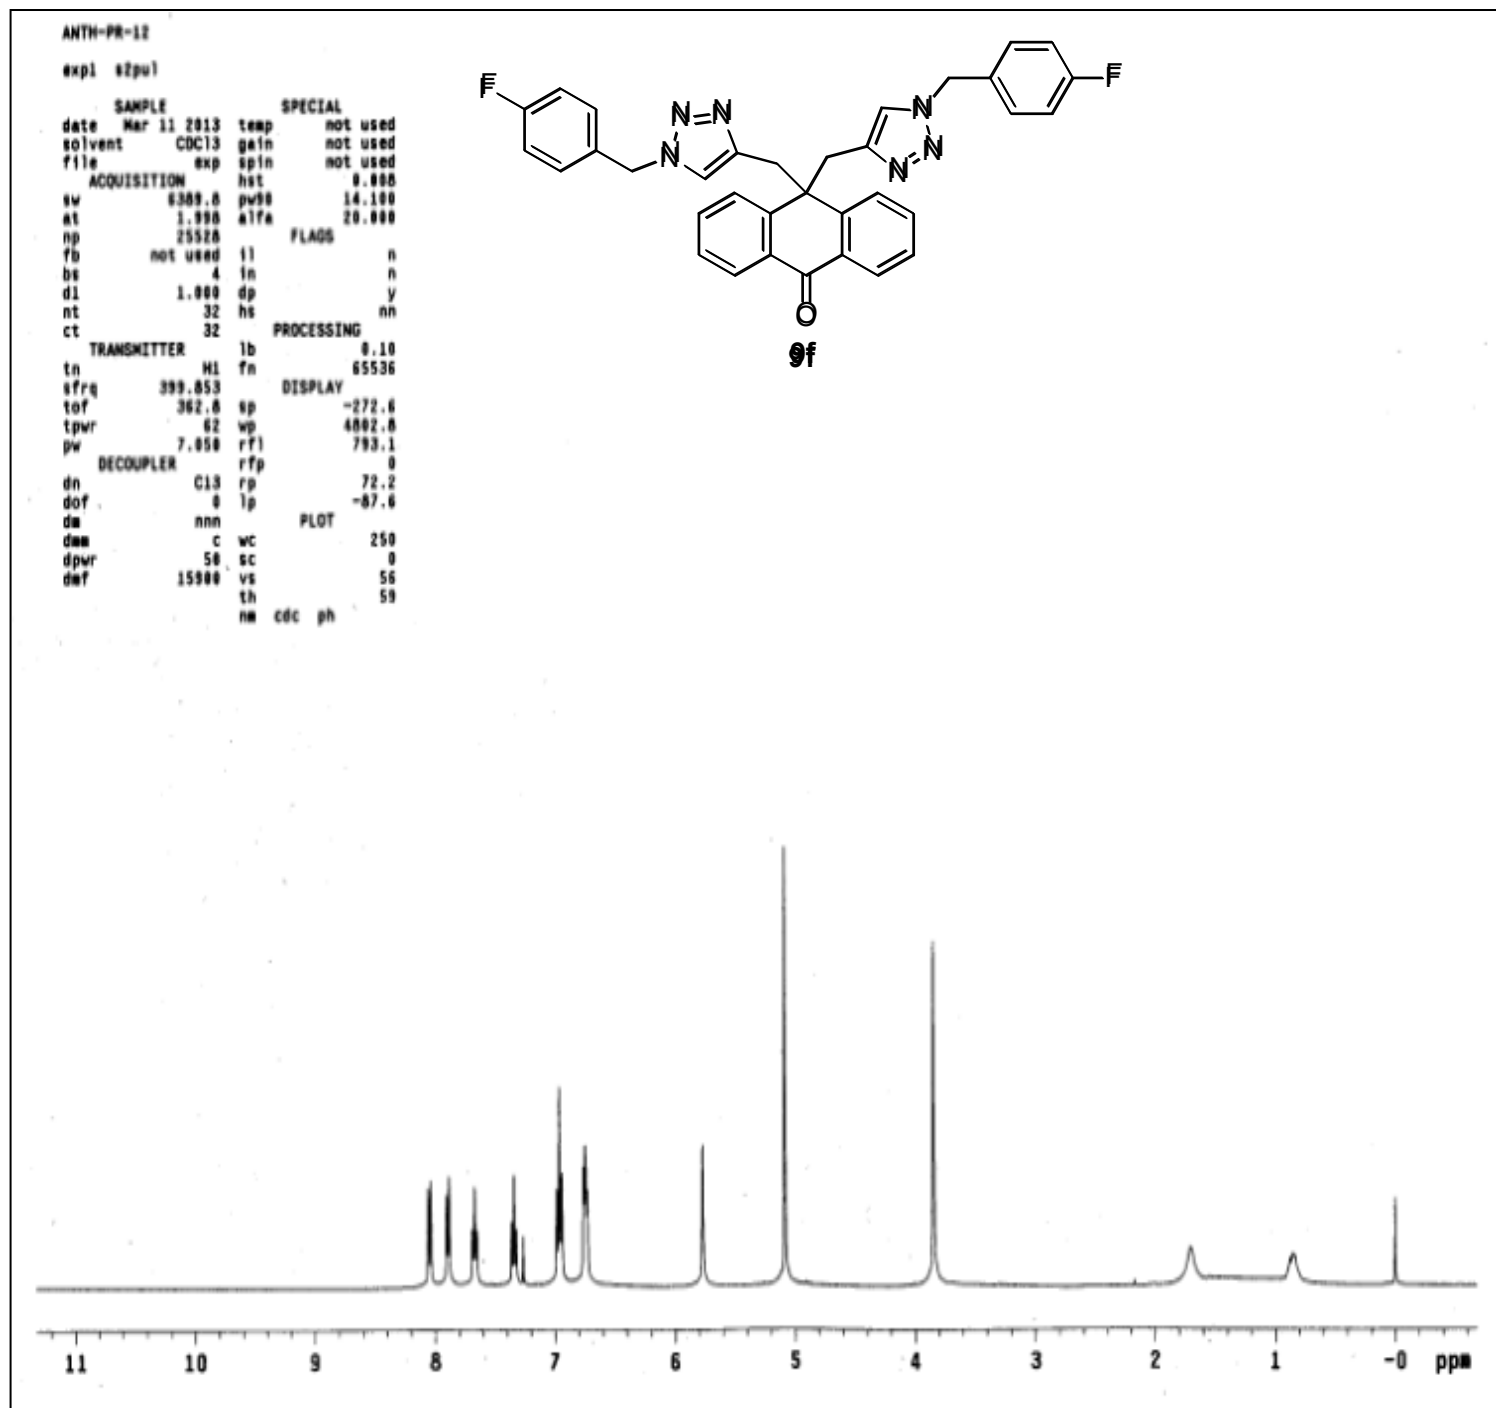

$^{13}\text{C}$  NMR spectra of **9f**

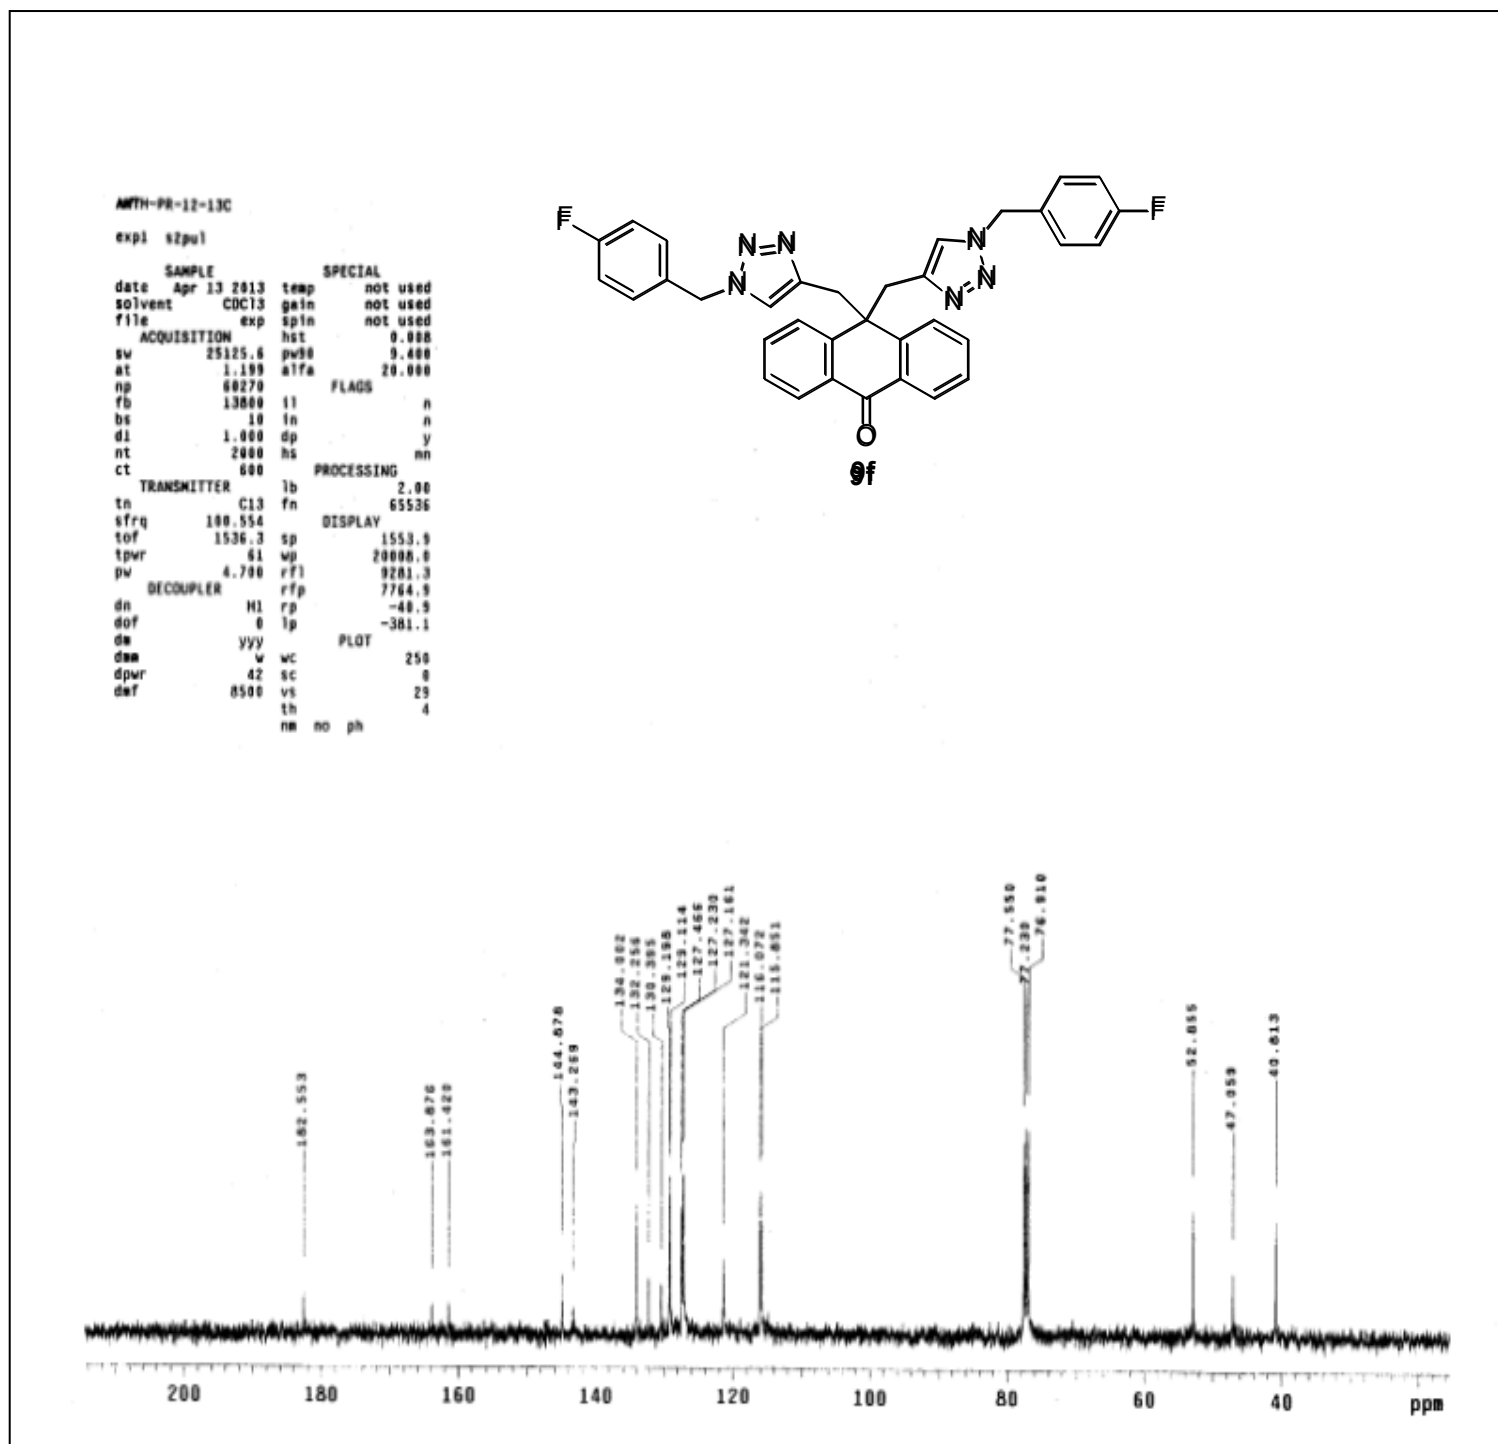

<sup>1</sup>H NMR spectra of **9g**

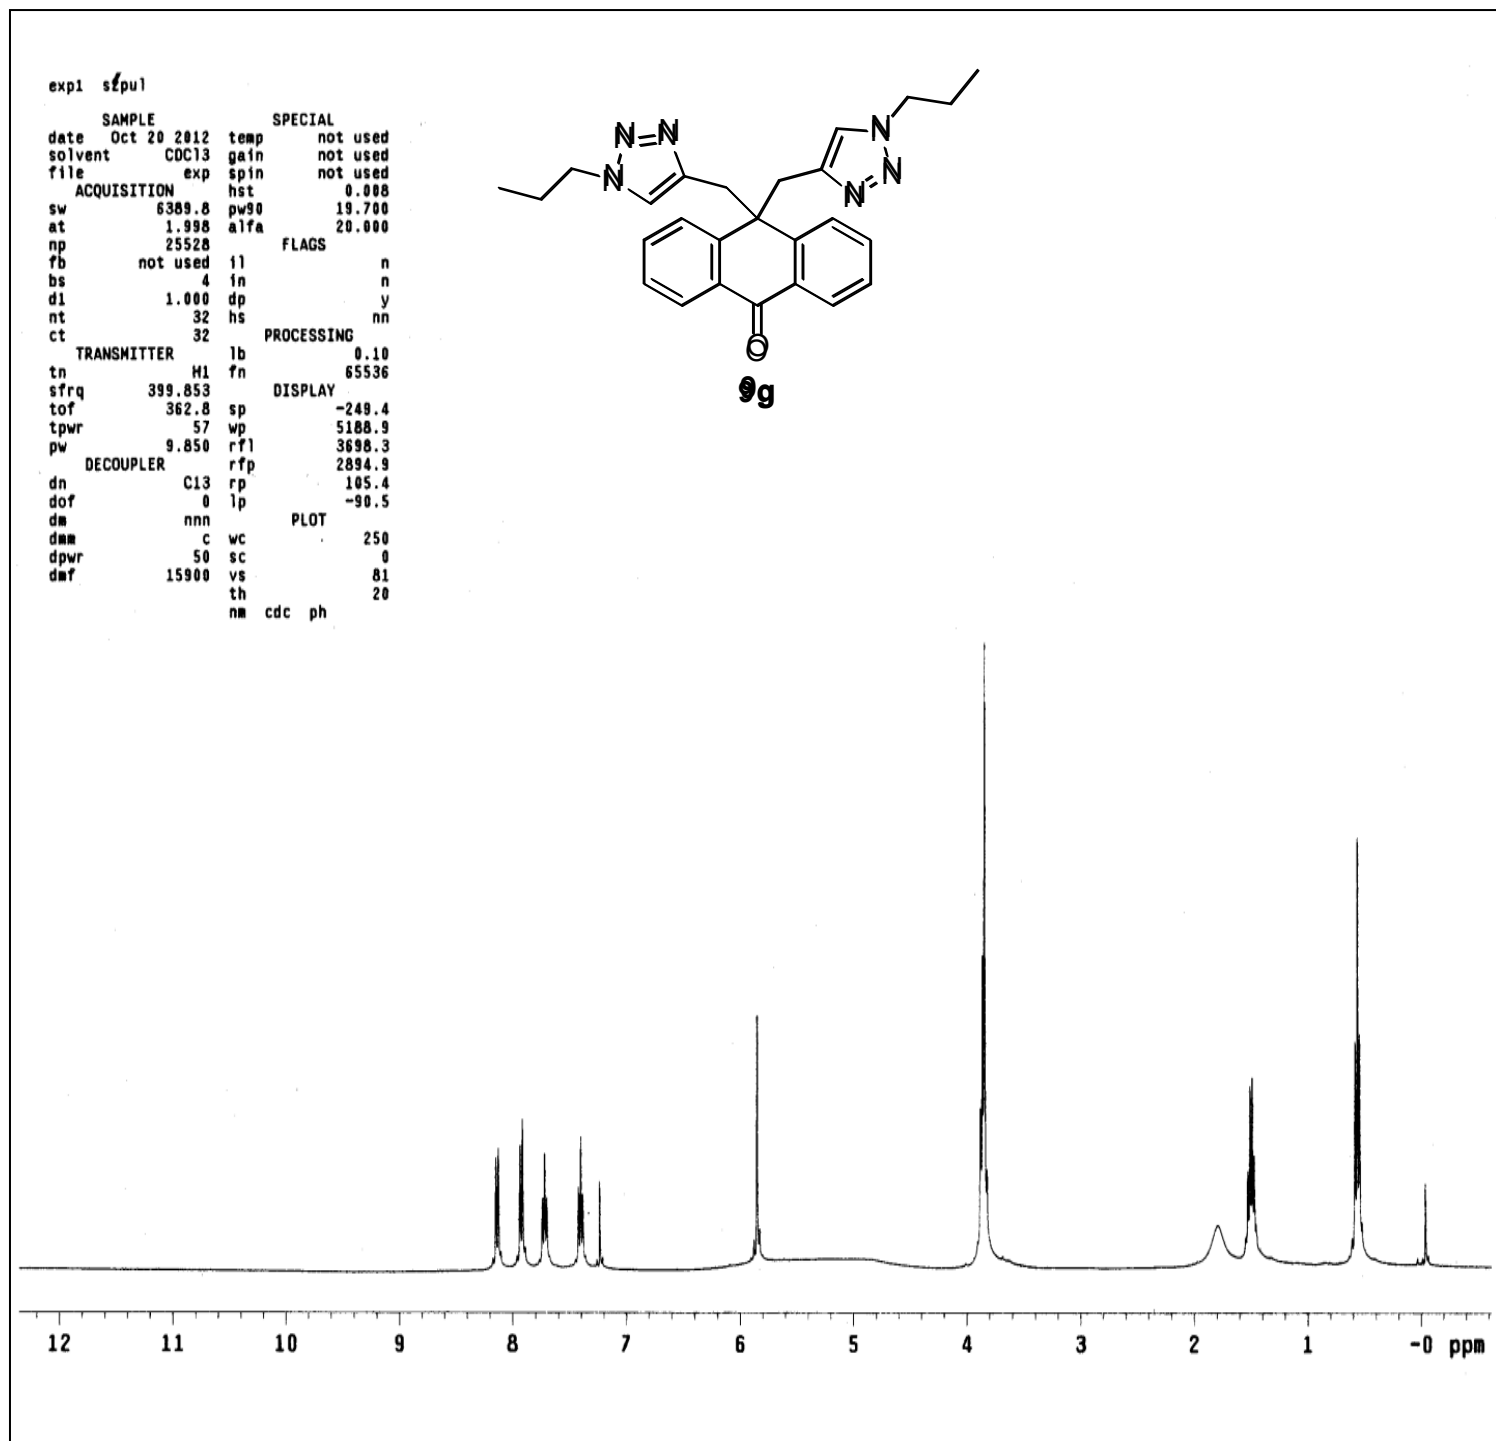

<sup>13</sup>C NMR spectra of 9g

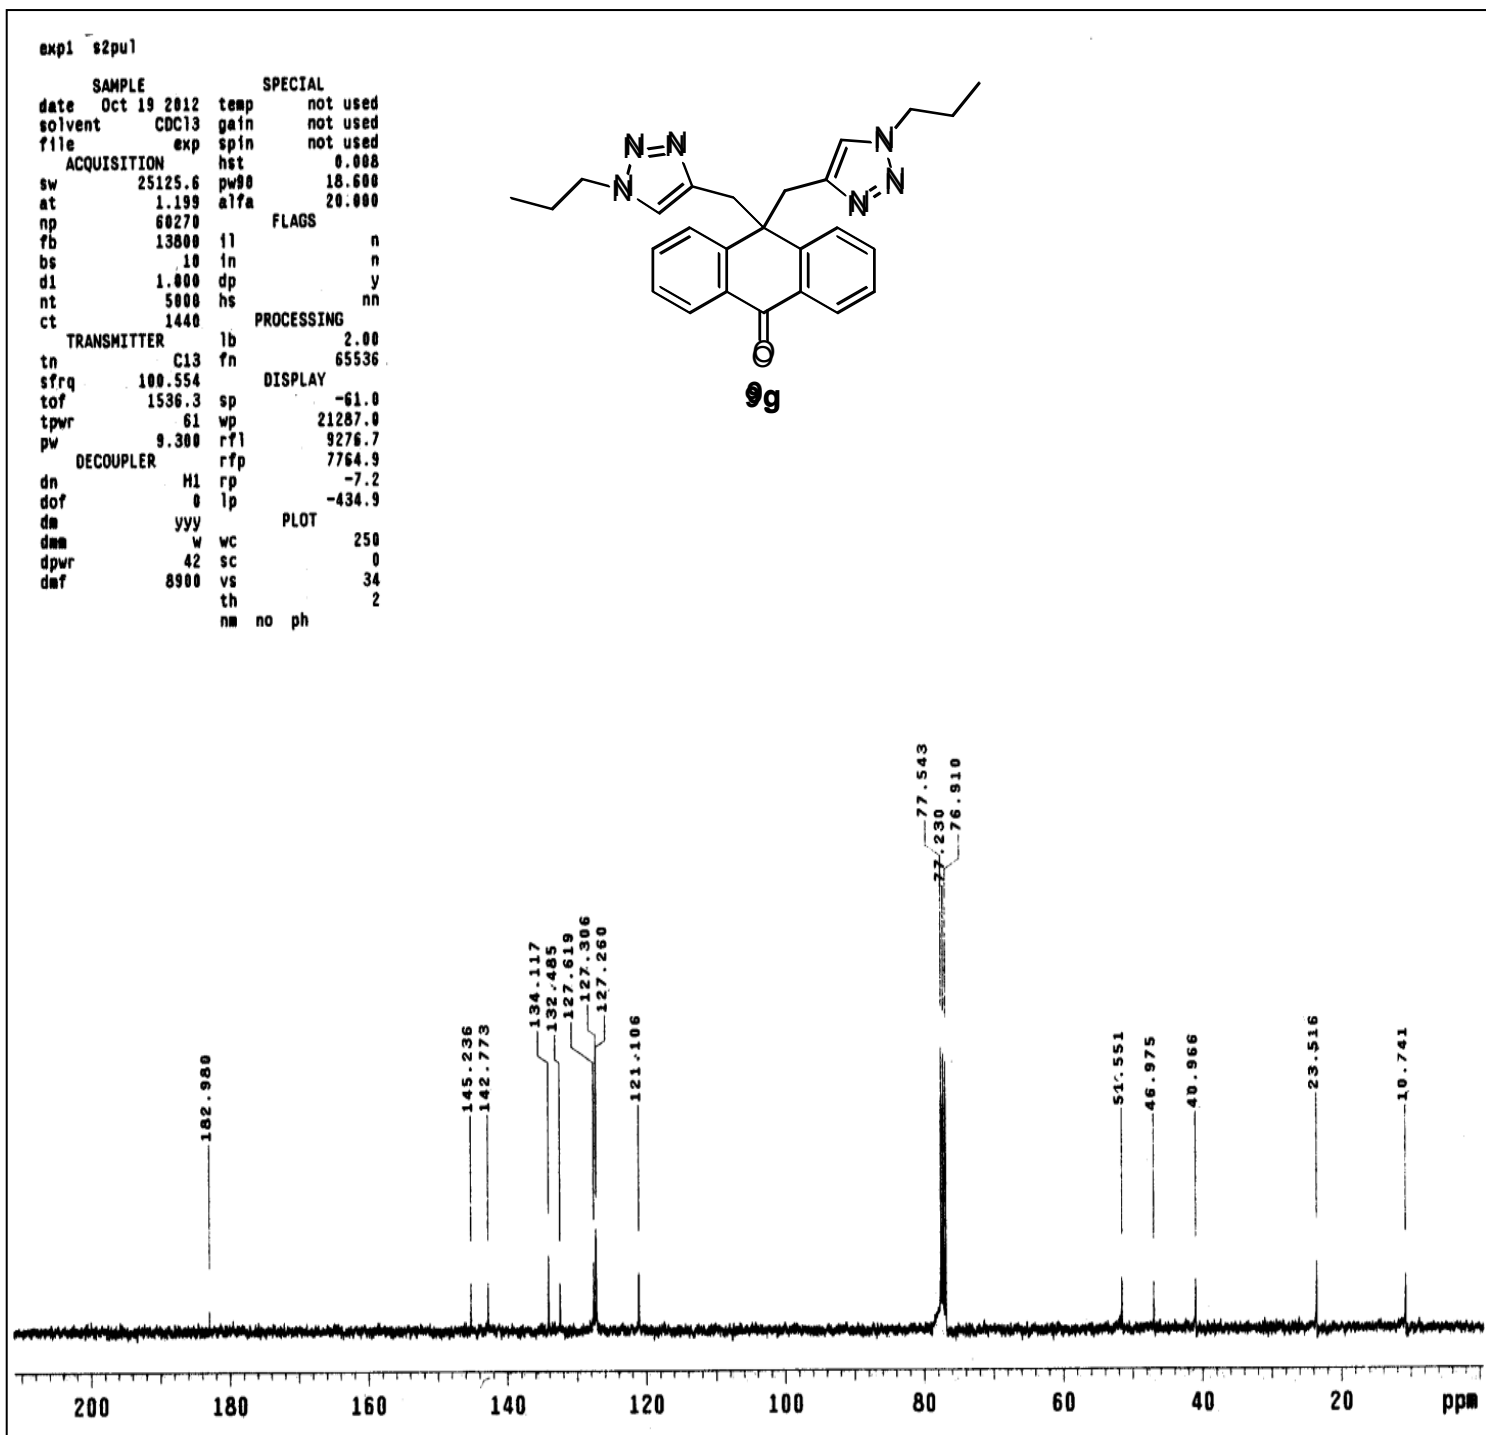

<sup>1</sup>H NMR spectra of **9h**

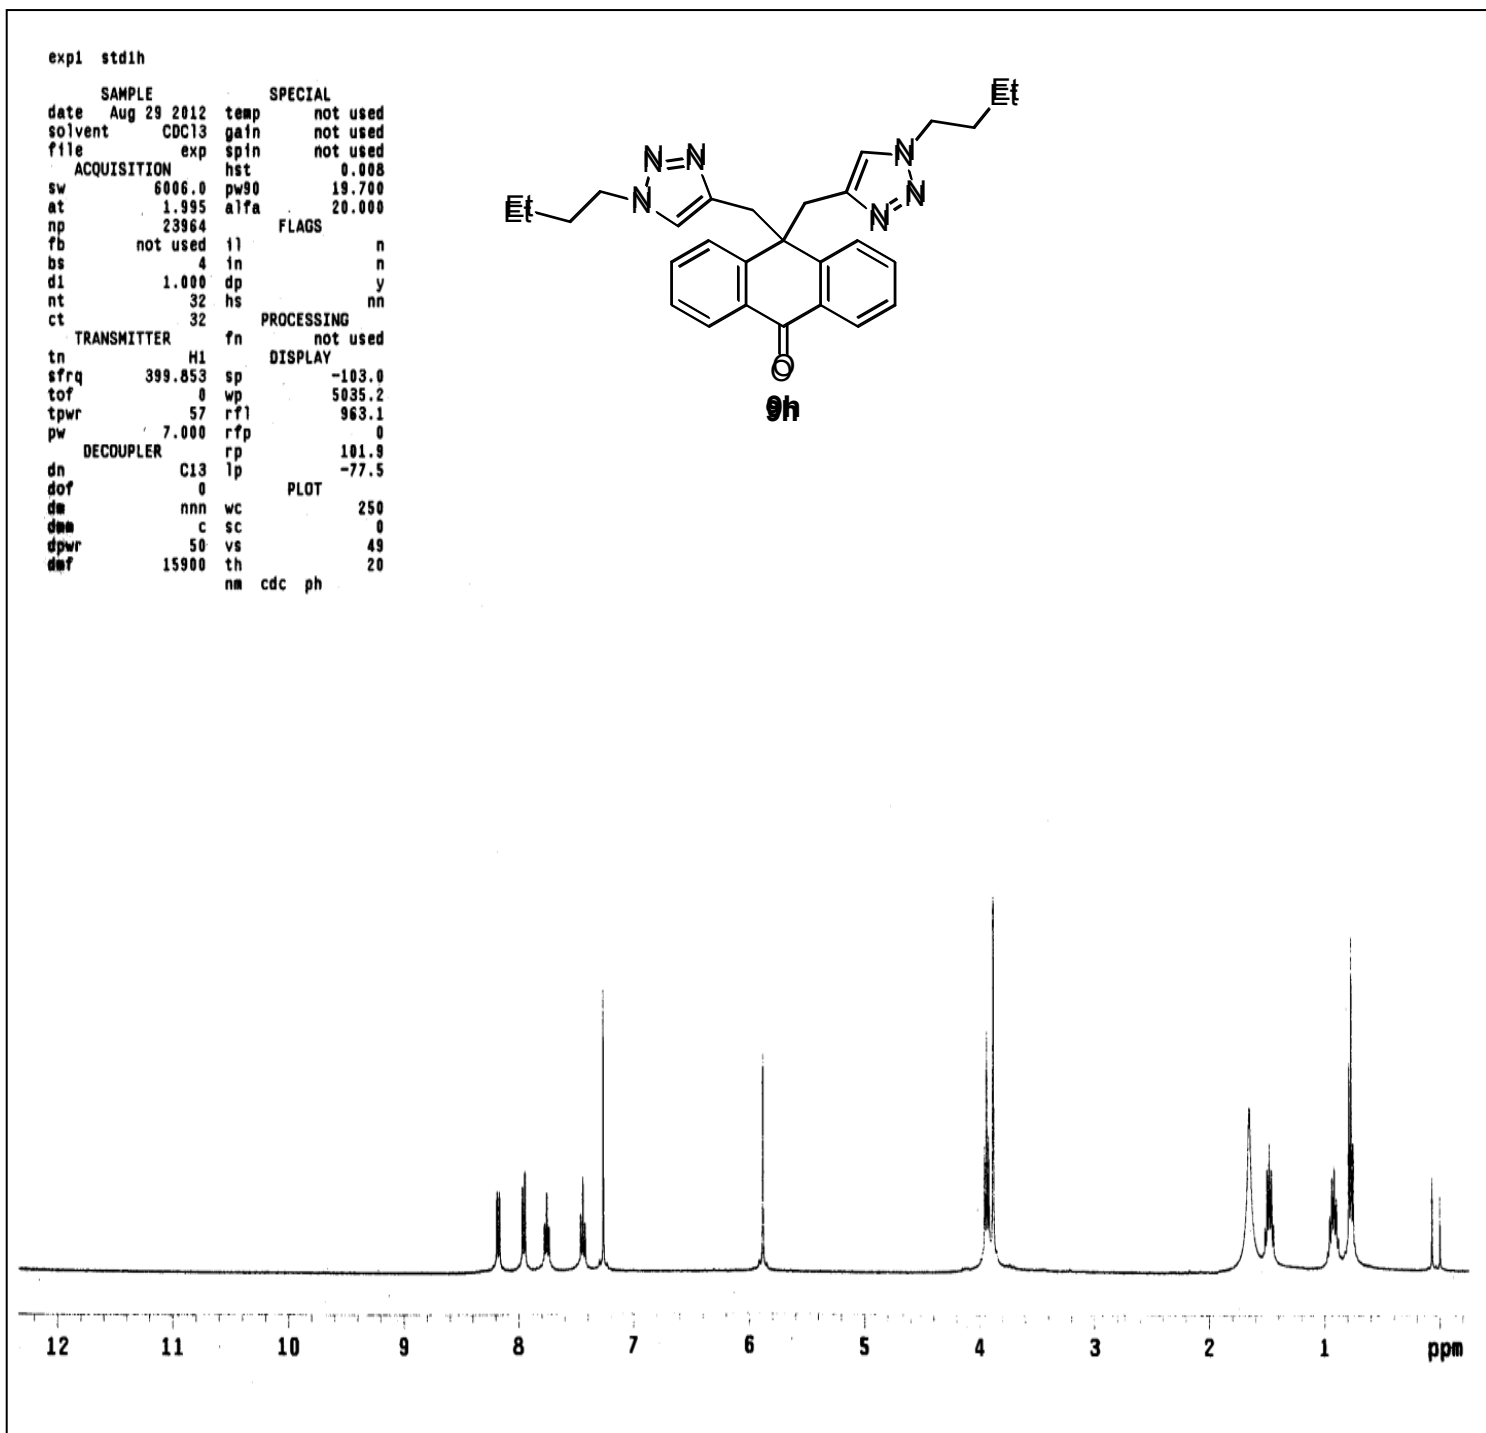



<sup>13</sup>C NMR spectra of 9h

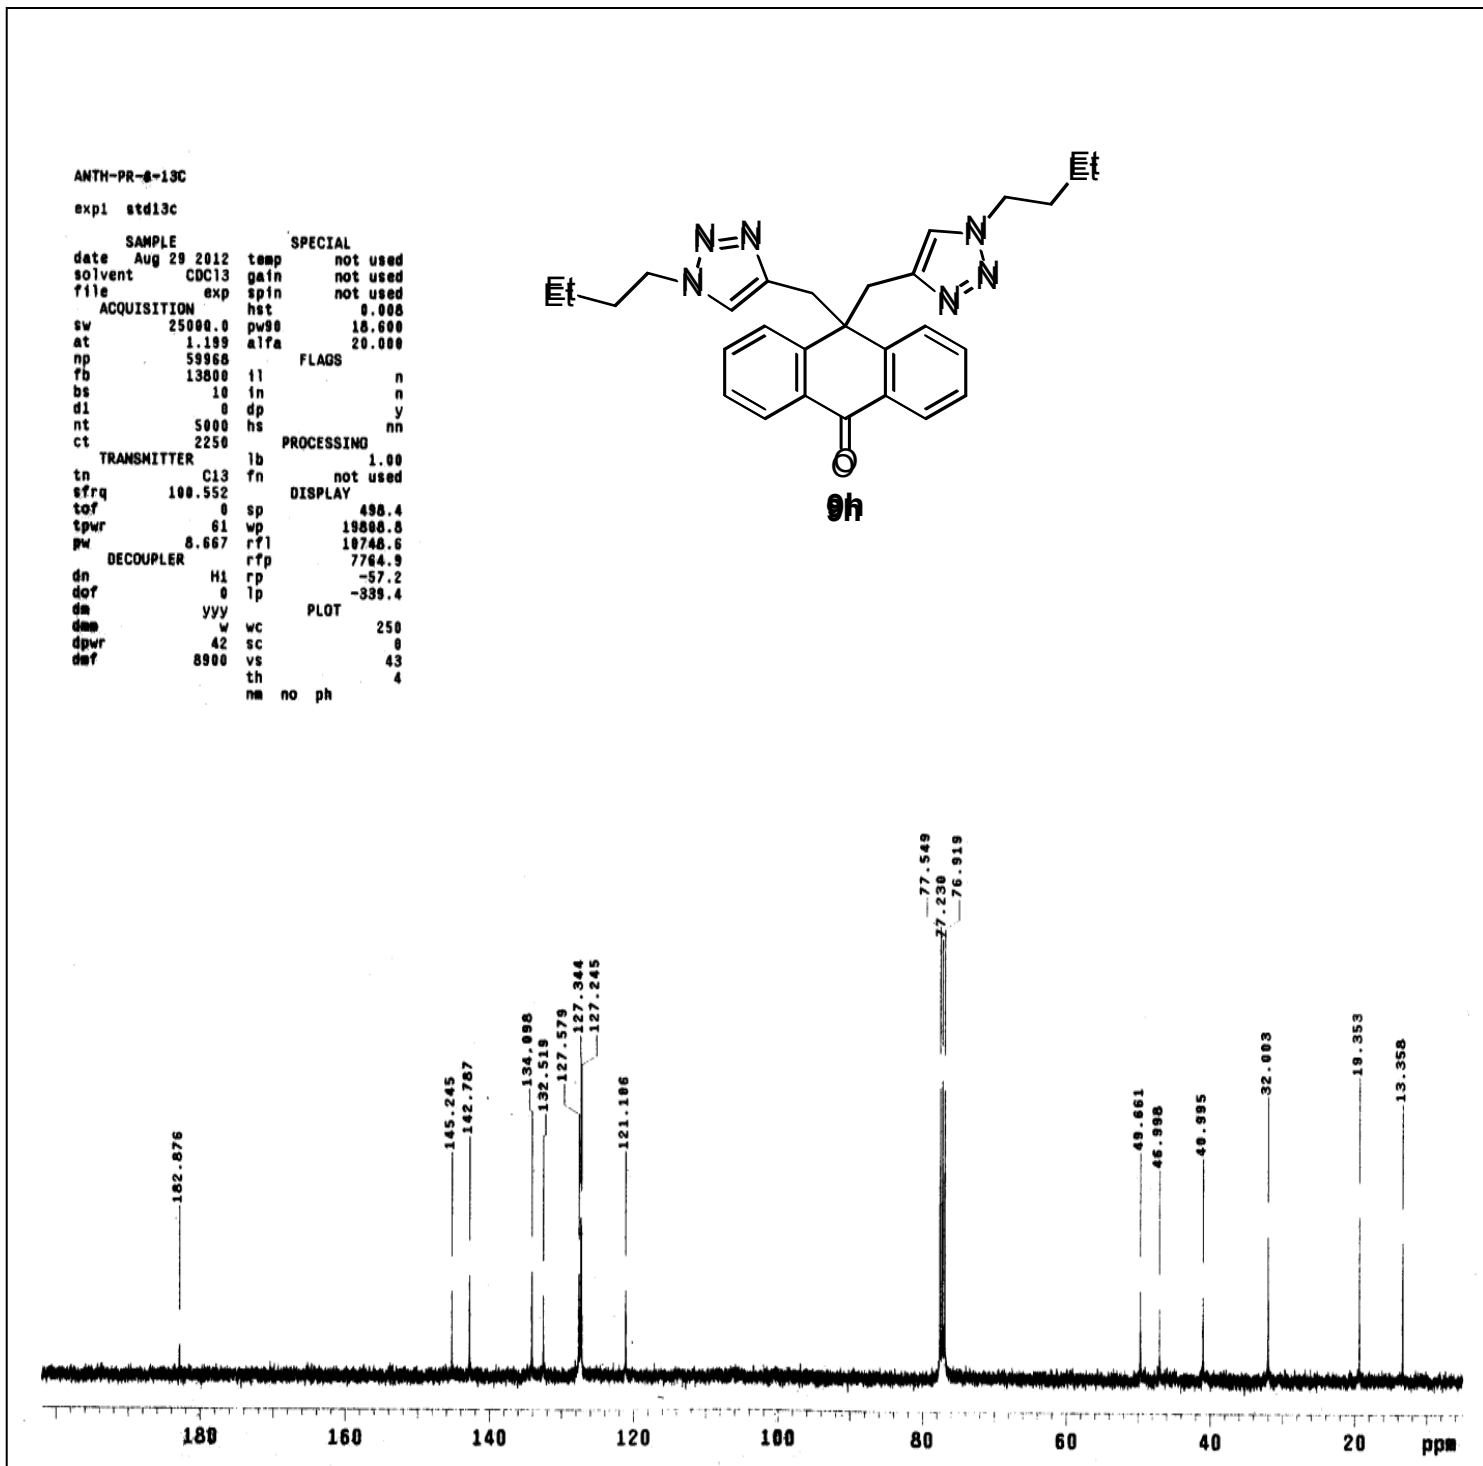

<sup>1</sup>H NMR spectra of 9i

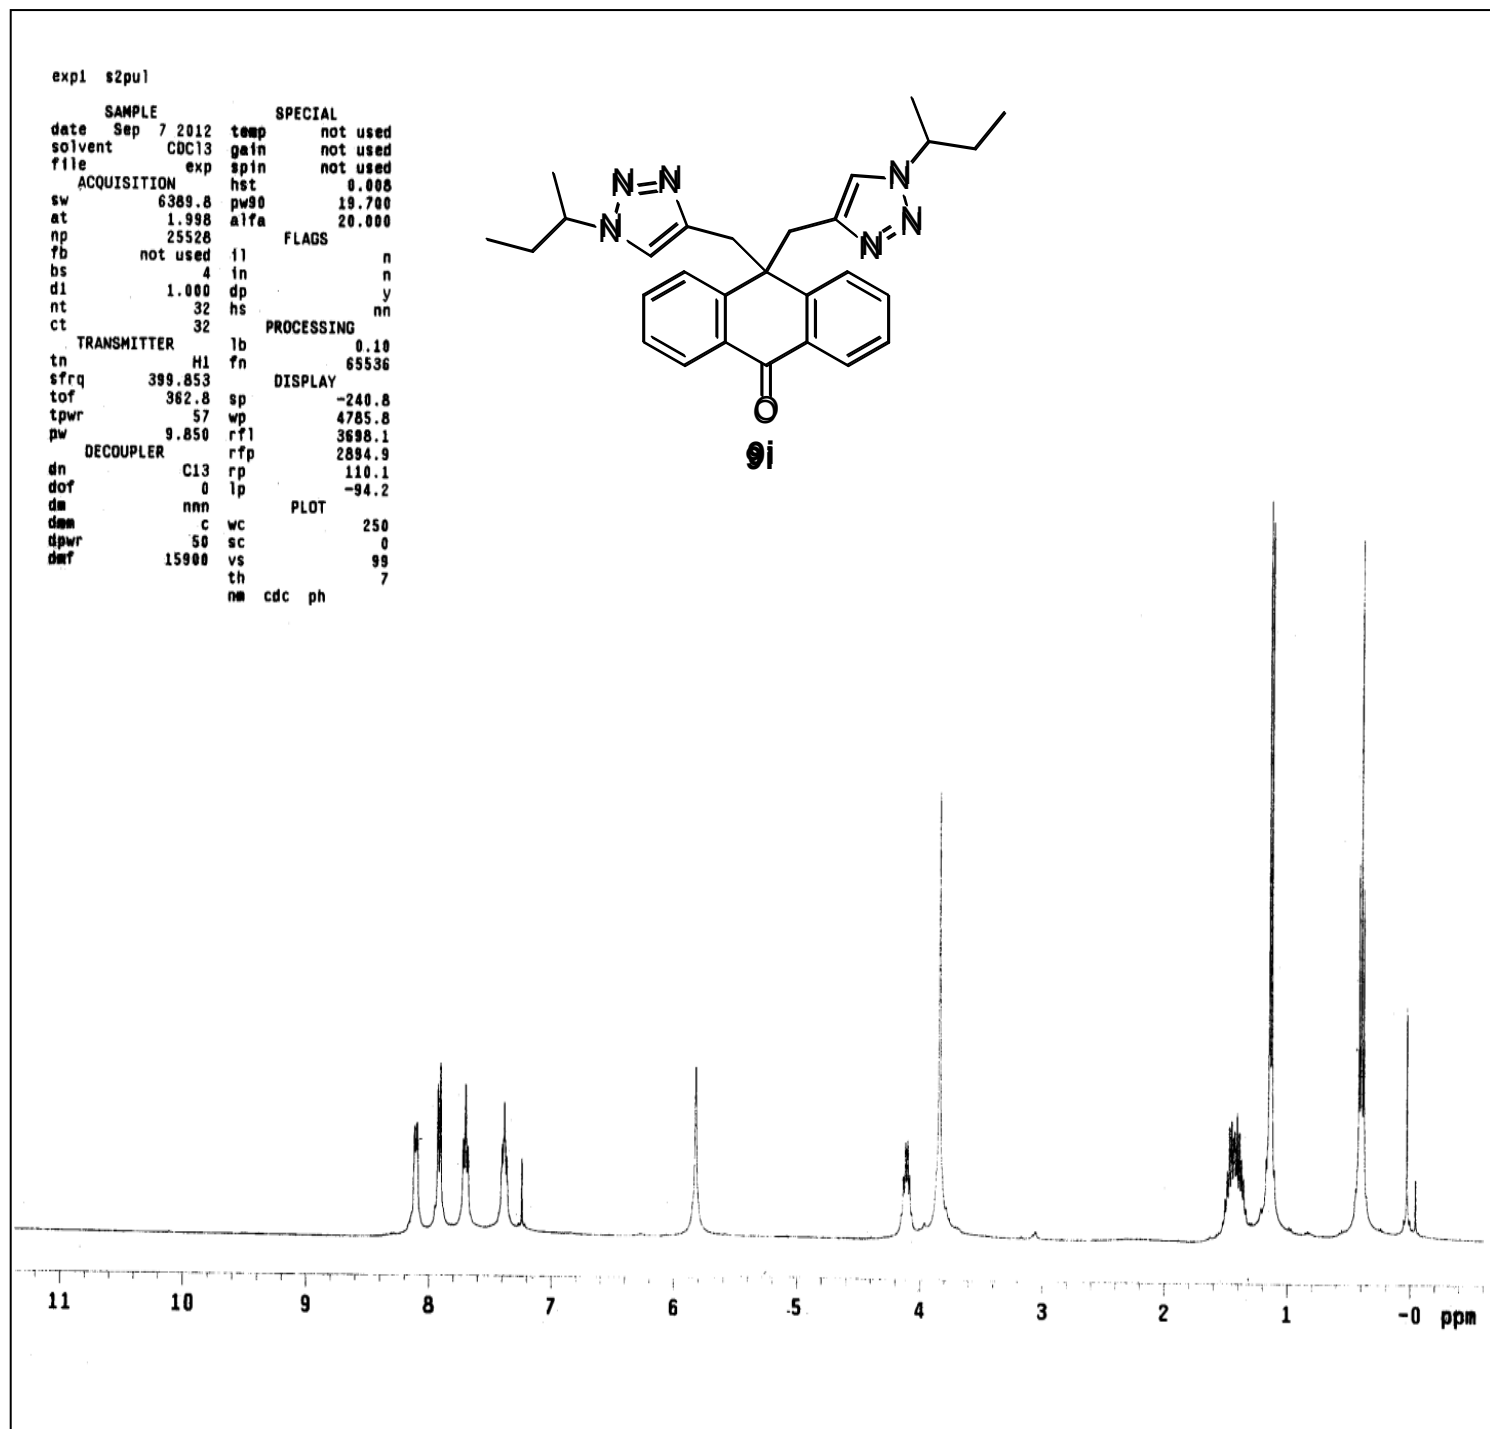

$^{13}\text{C}$  NMR spectra of **9i**

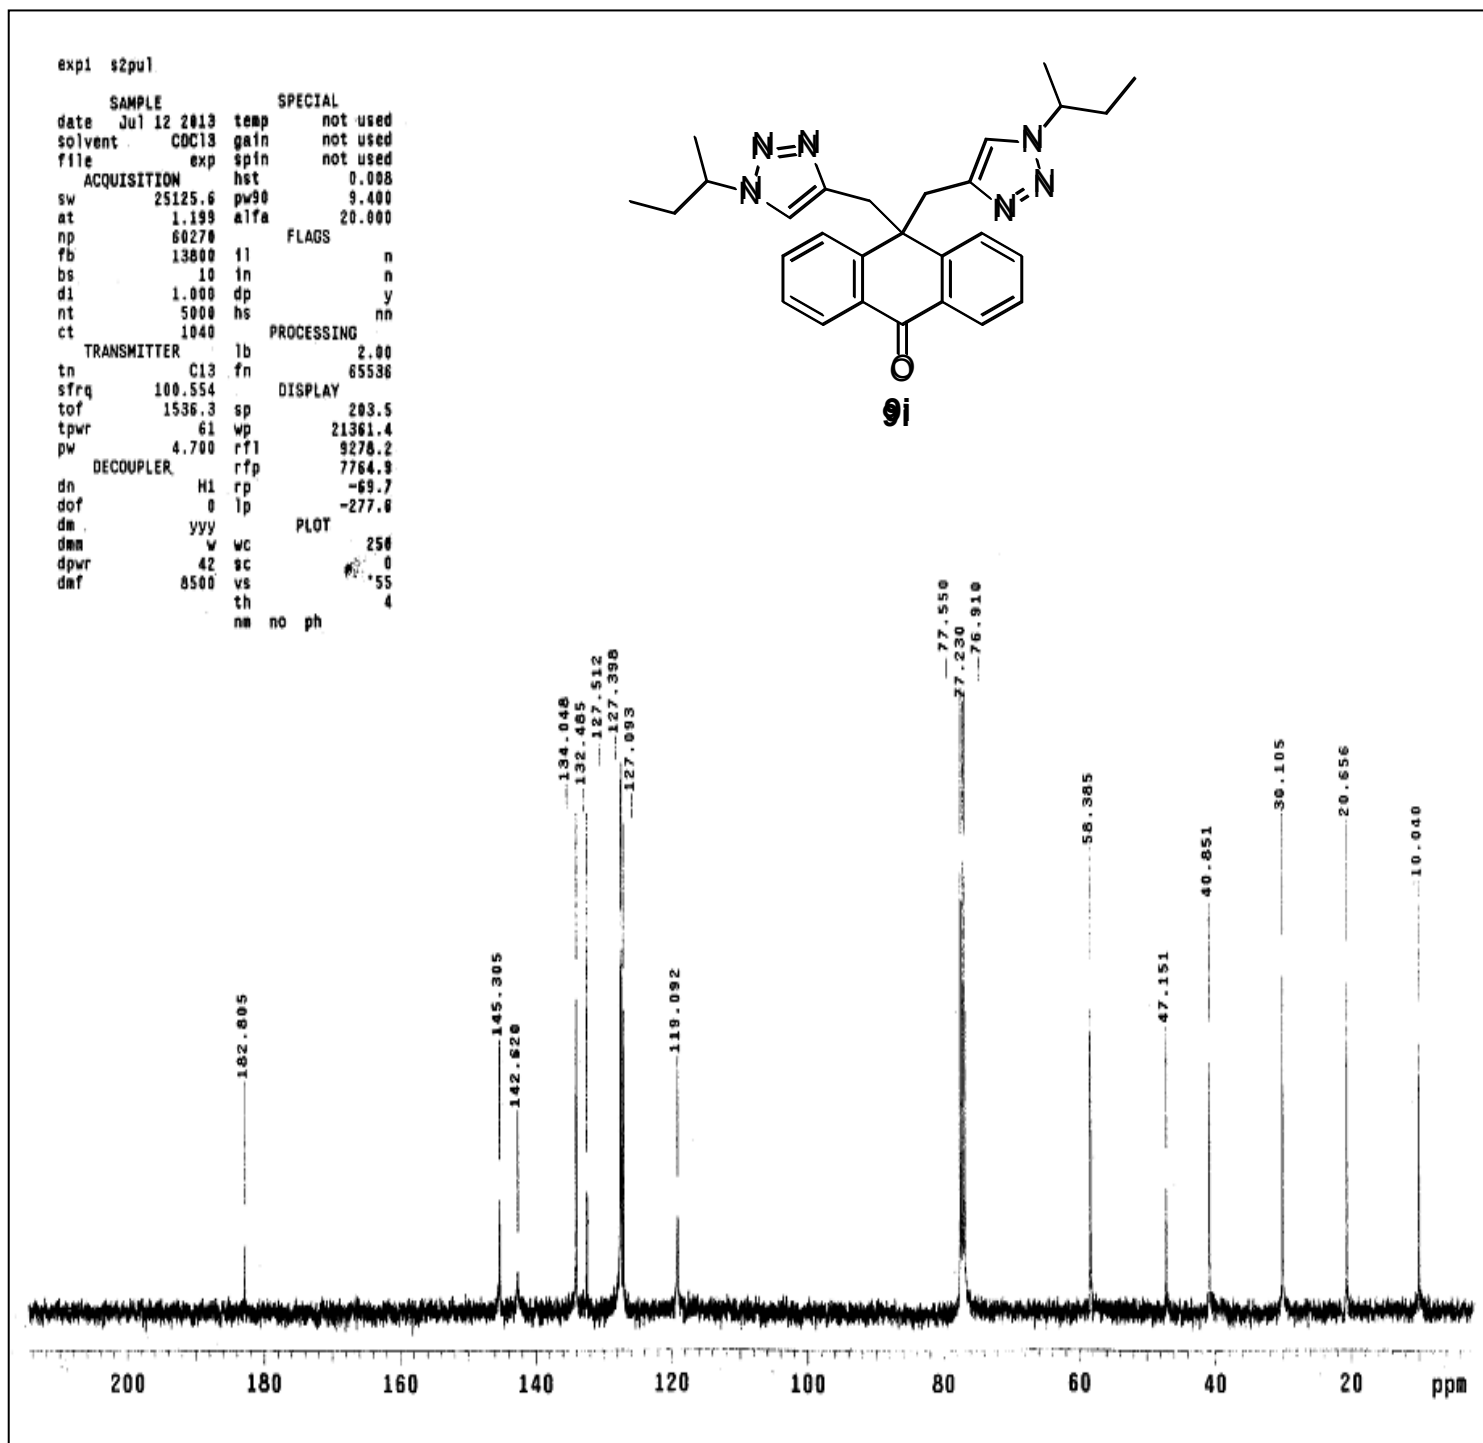

<sup>1</sup>H NMR spectra of 9j

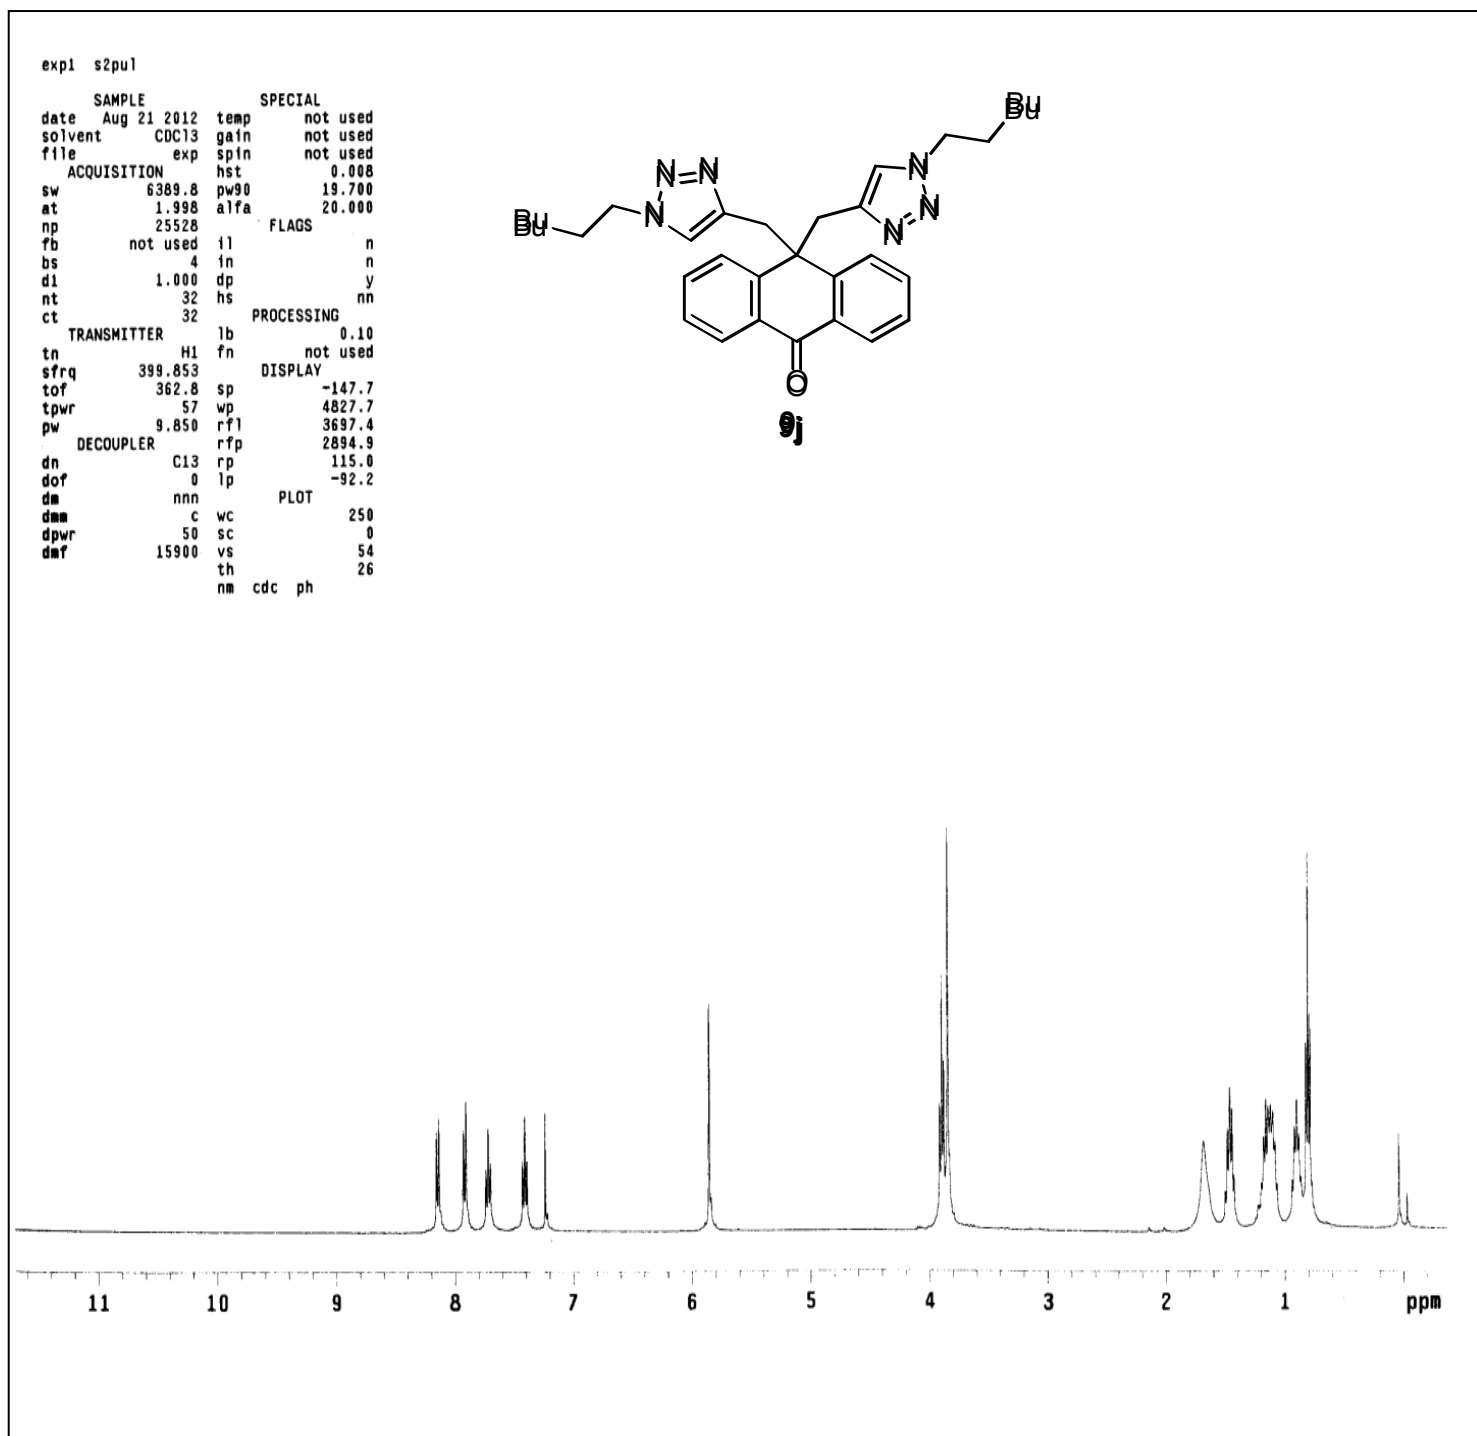

$^{13}\text{C}$  NMR spectra of **9j**

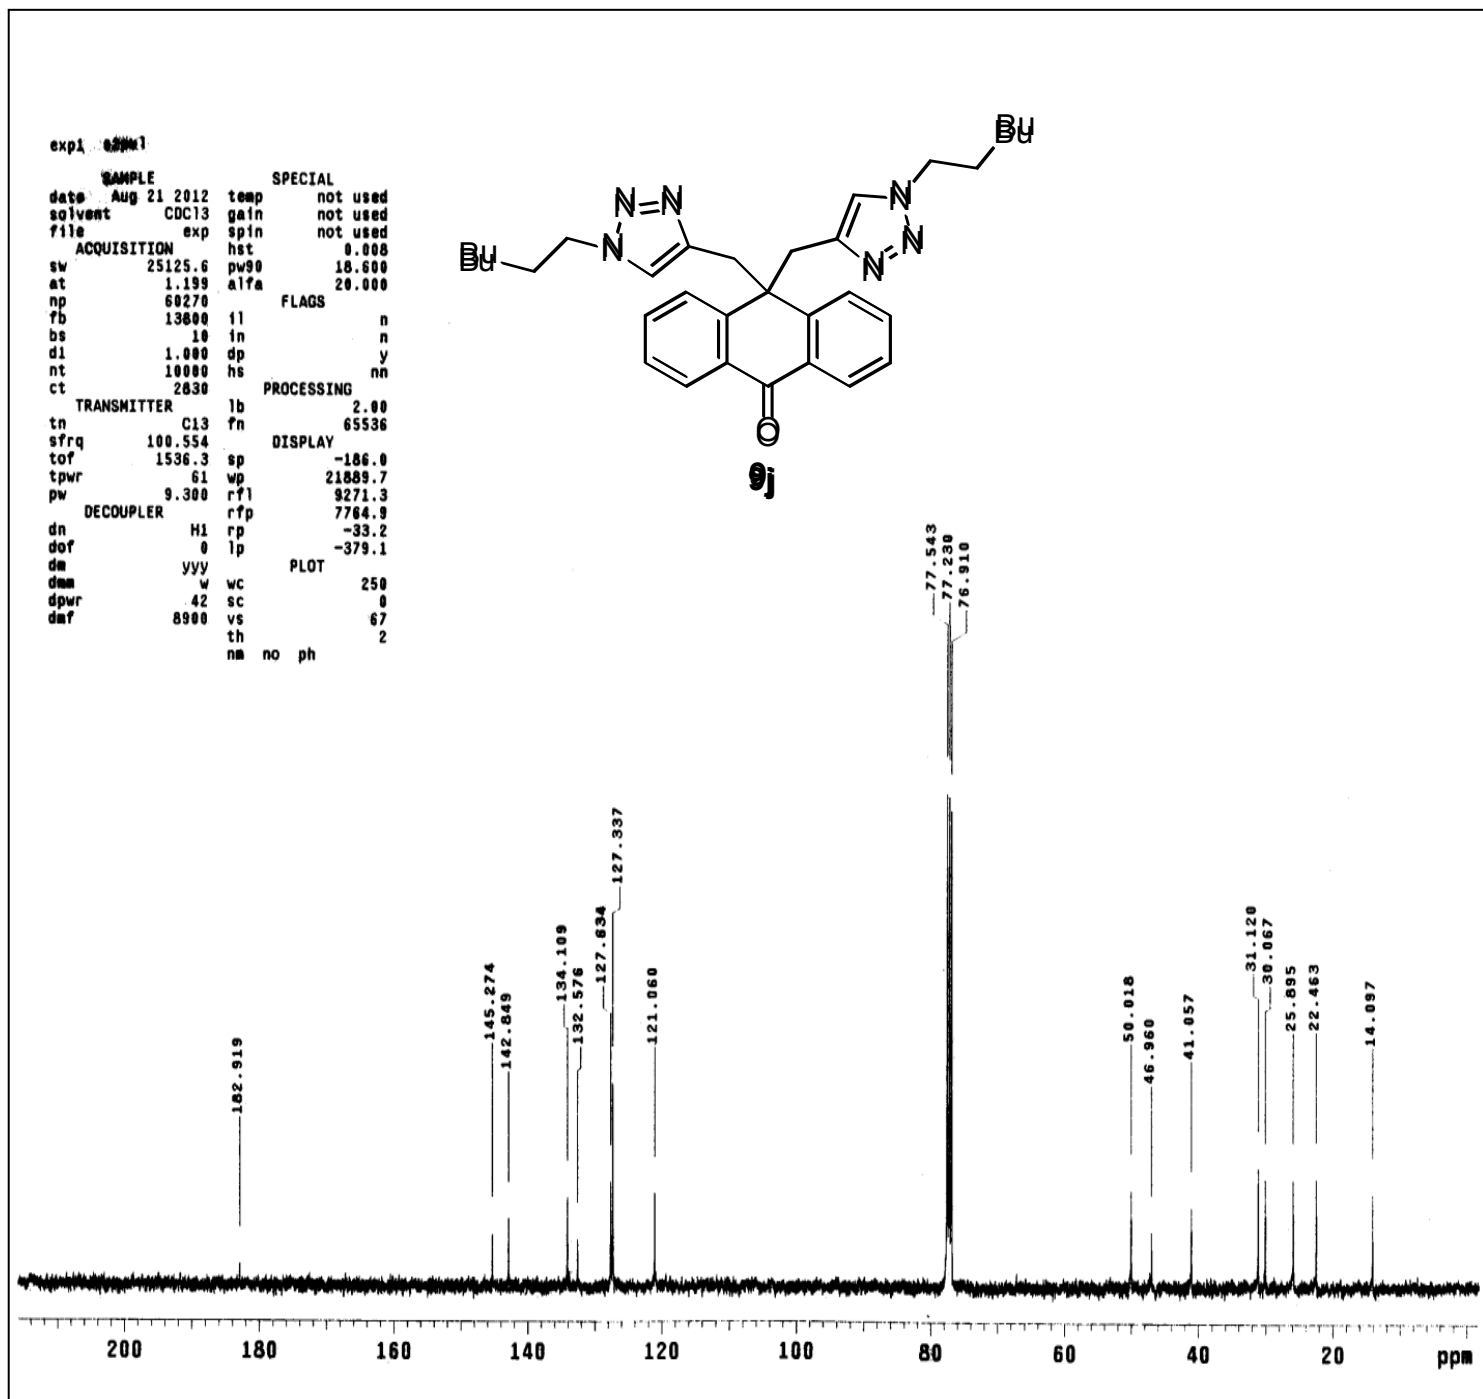

<sup>1</sup>H NMR spectra of **9k**

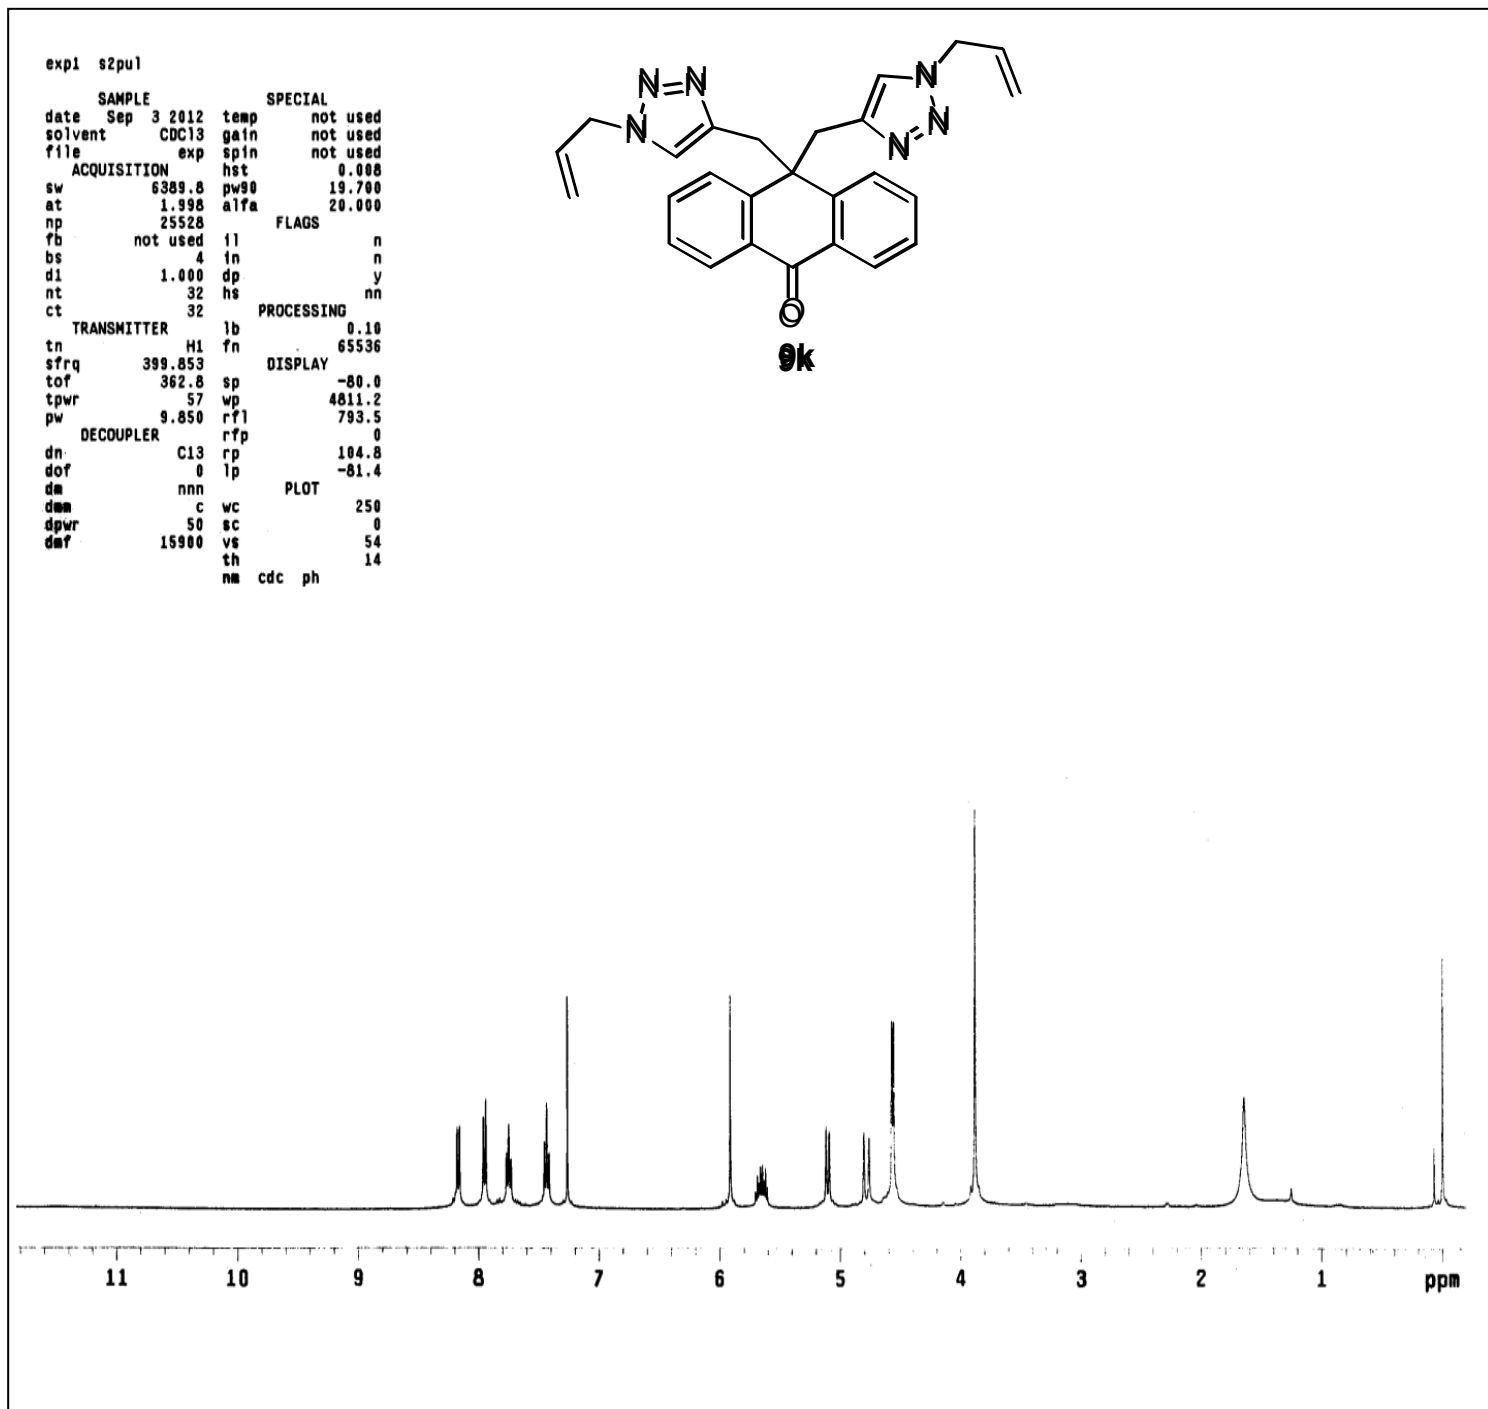

<sup>13</sup>C NMR spectra of 9k

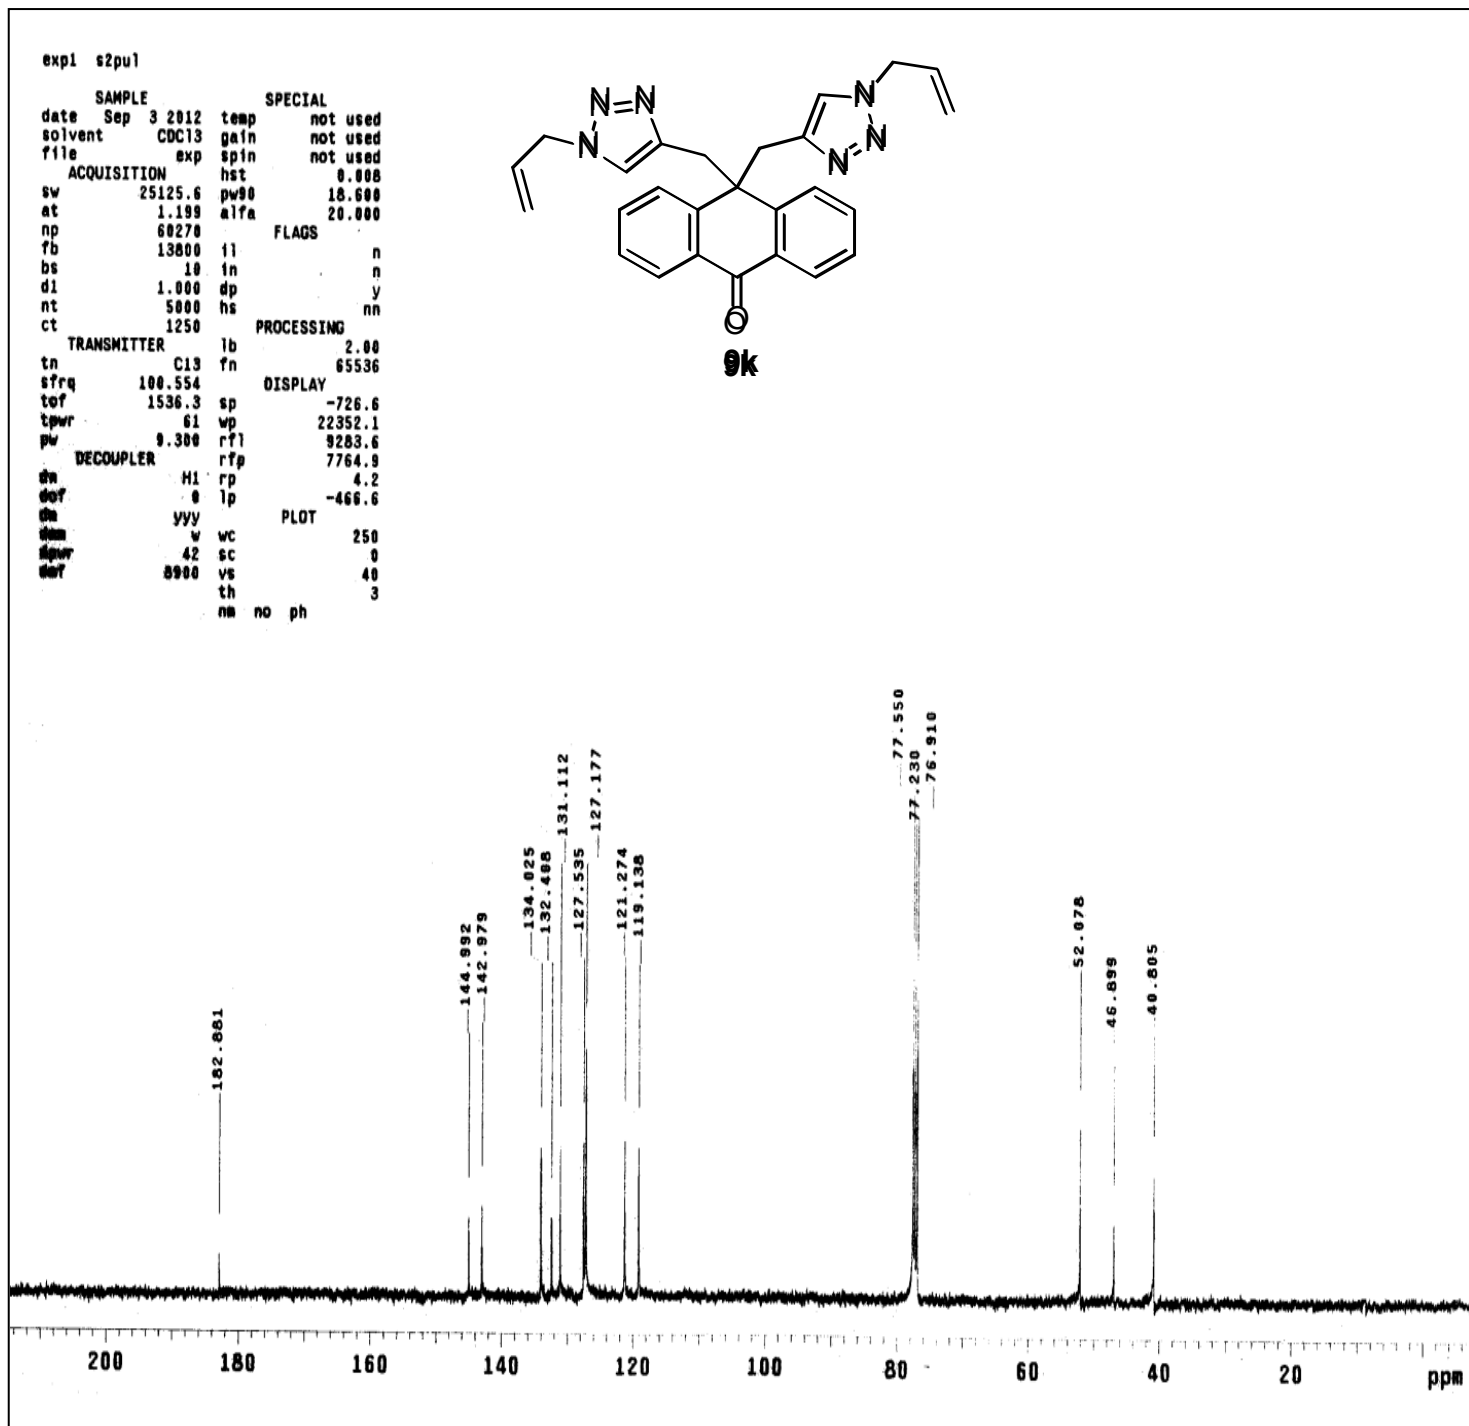

<sup>1</sup>H NMR spectra of 91

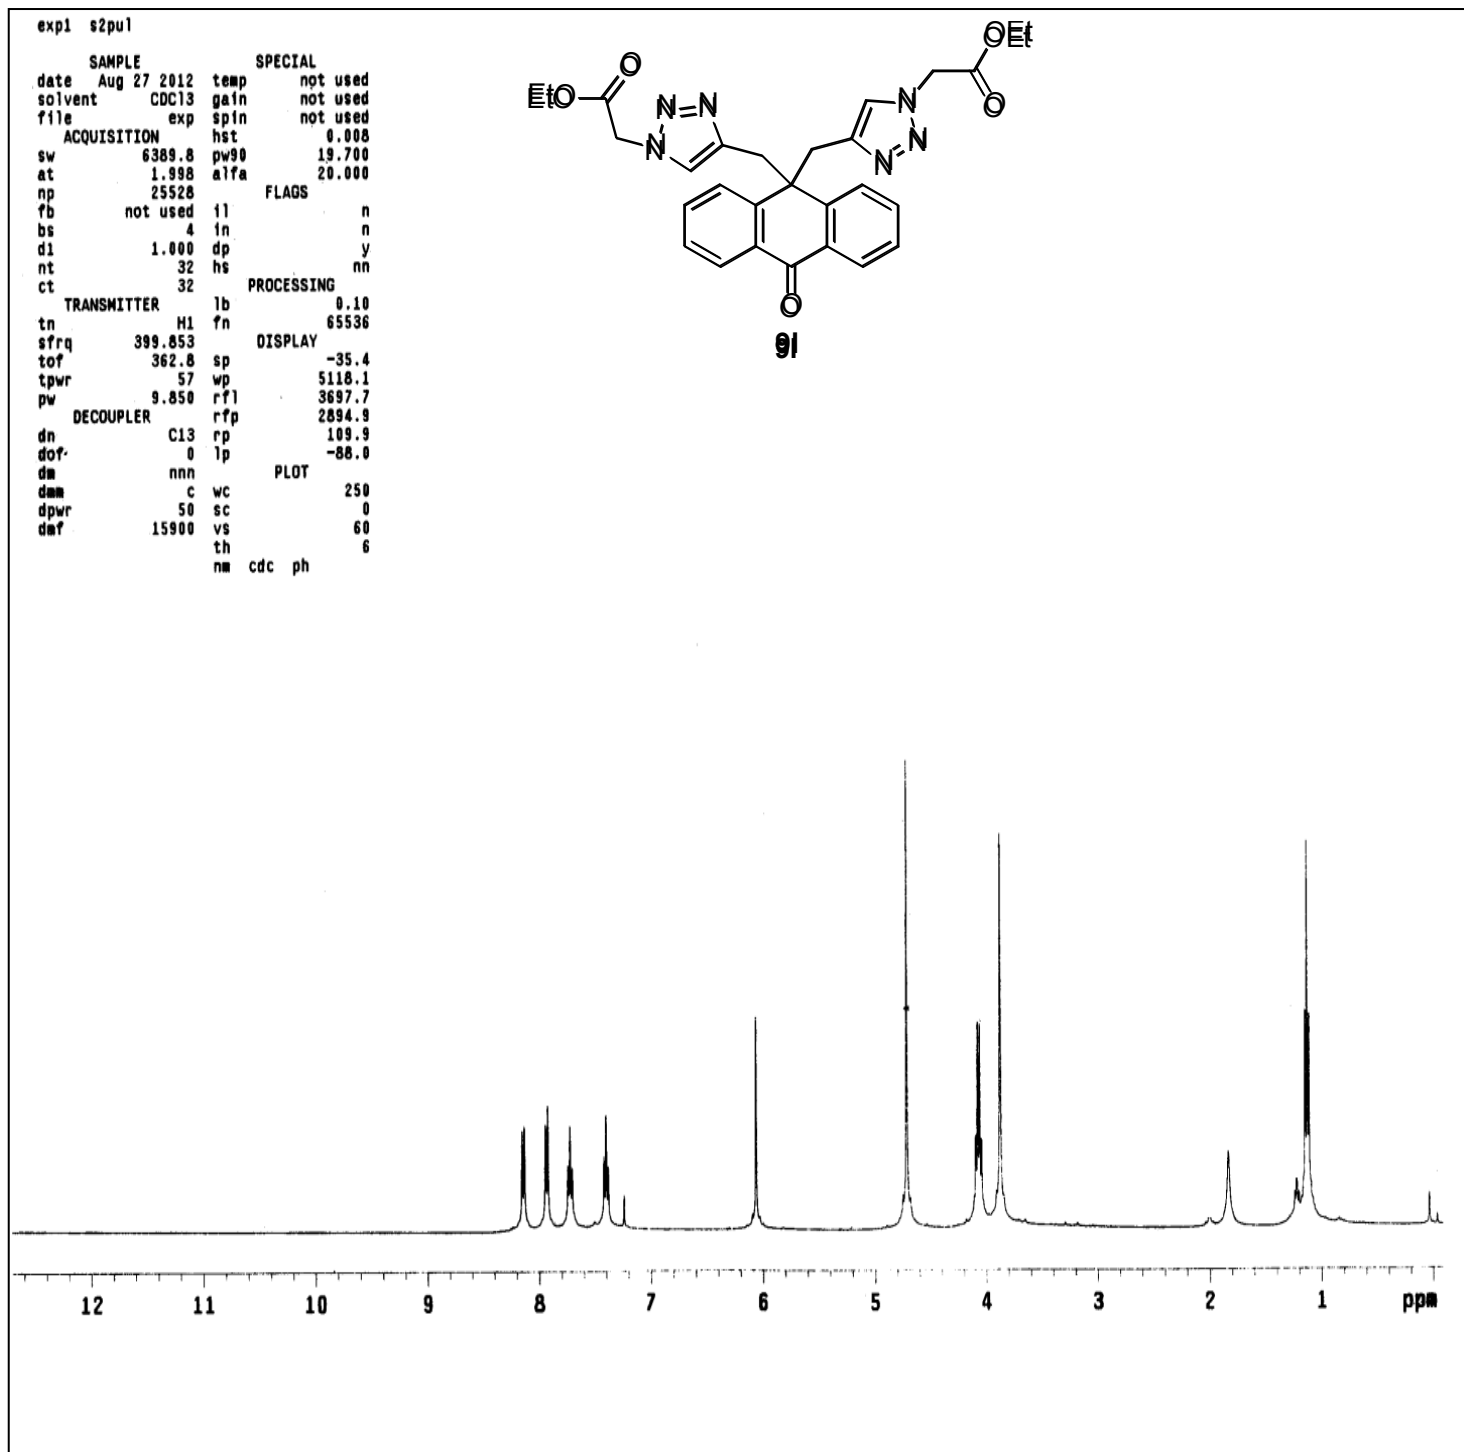



<sup>13</sup>C NMR spectra of 91

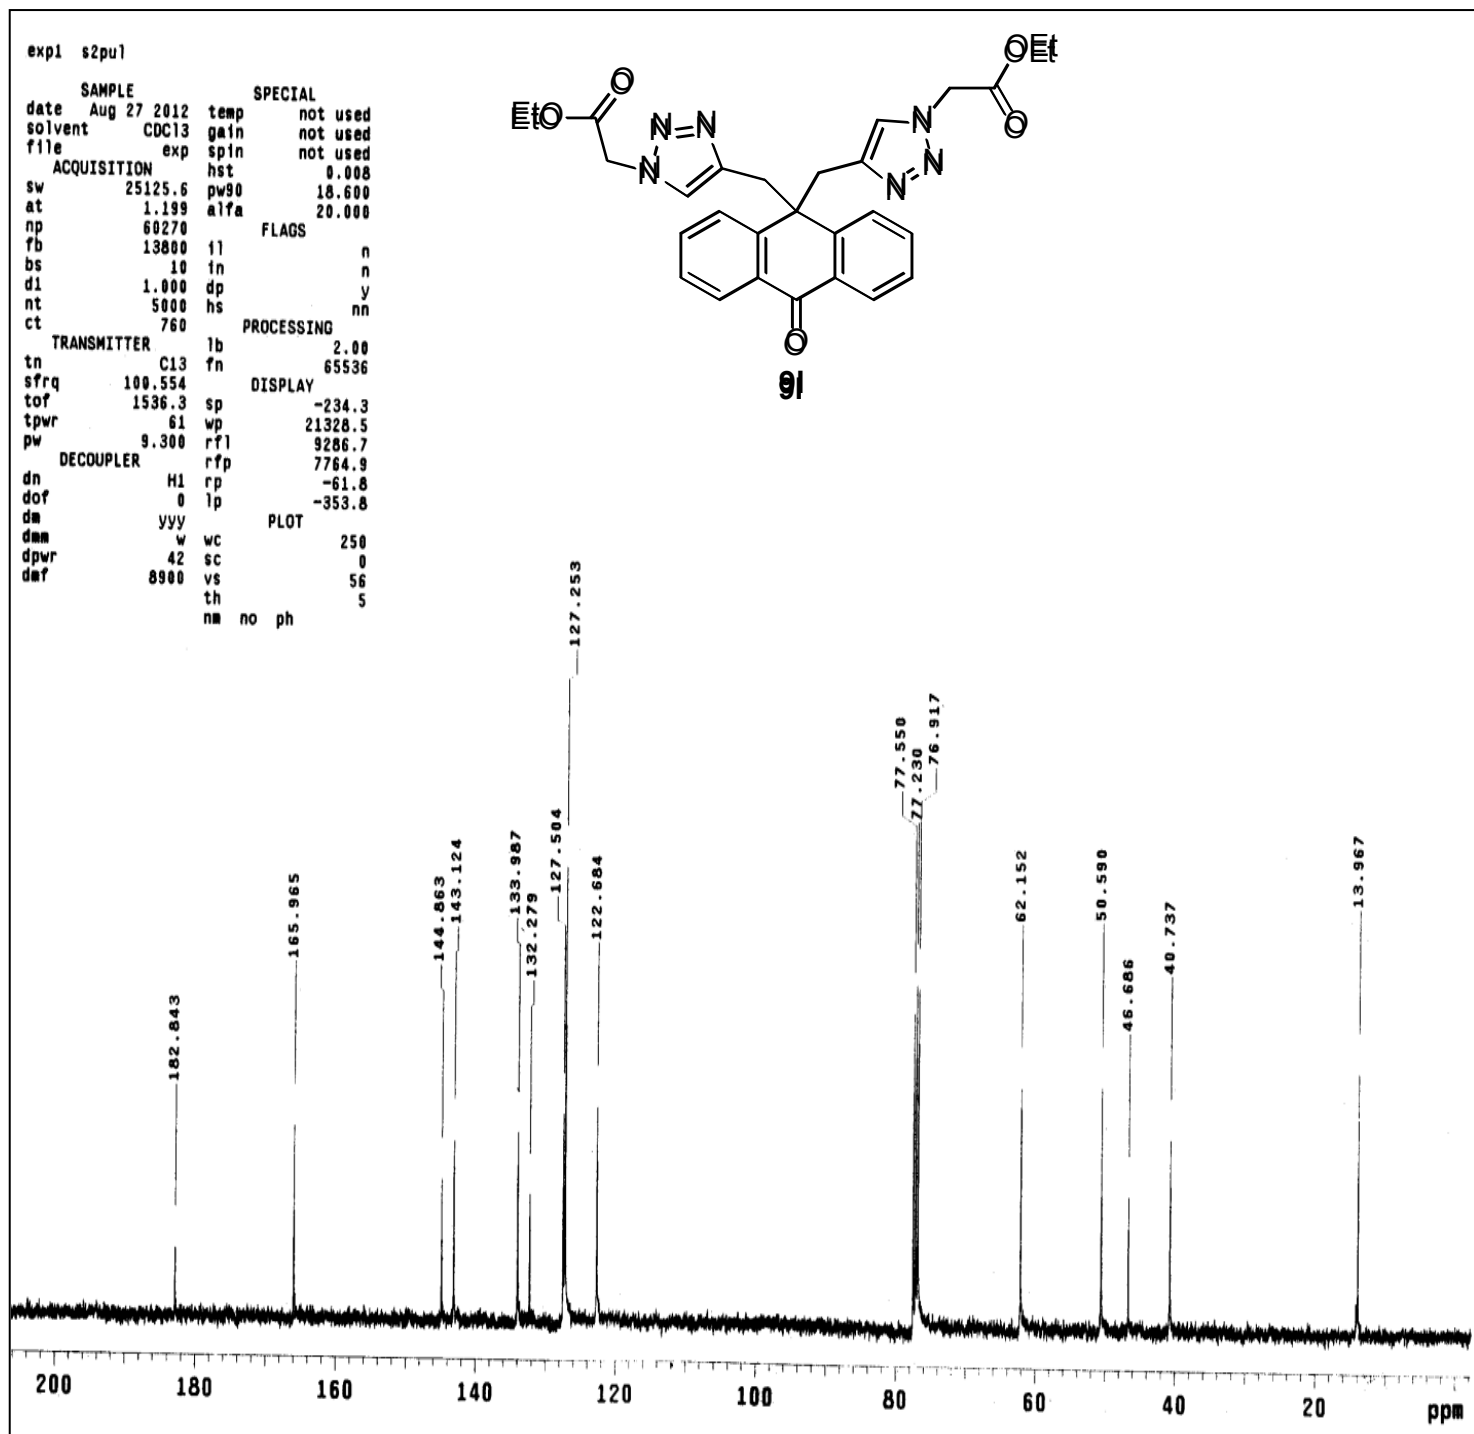

<sup>1</sup>H NMR spectra of **10**

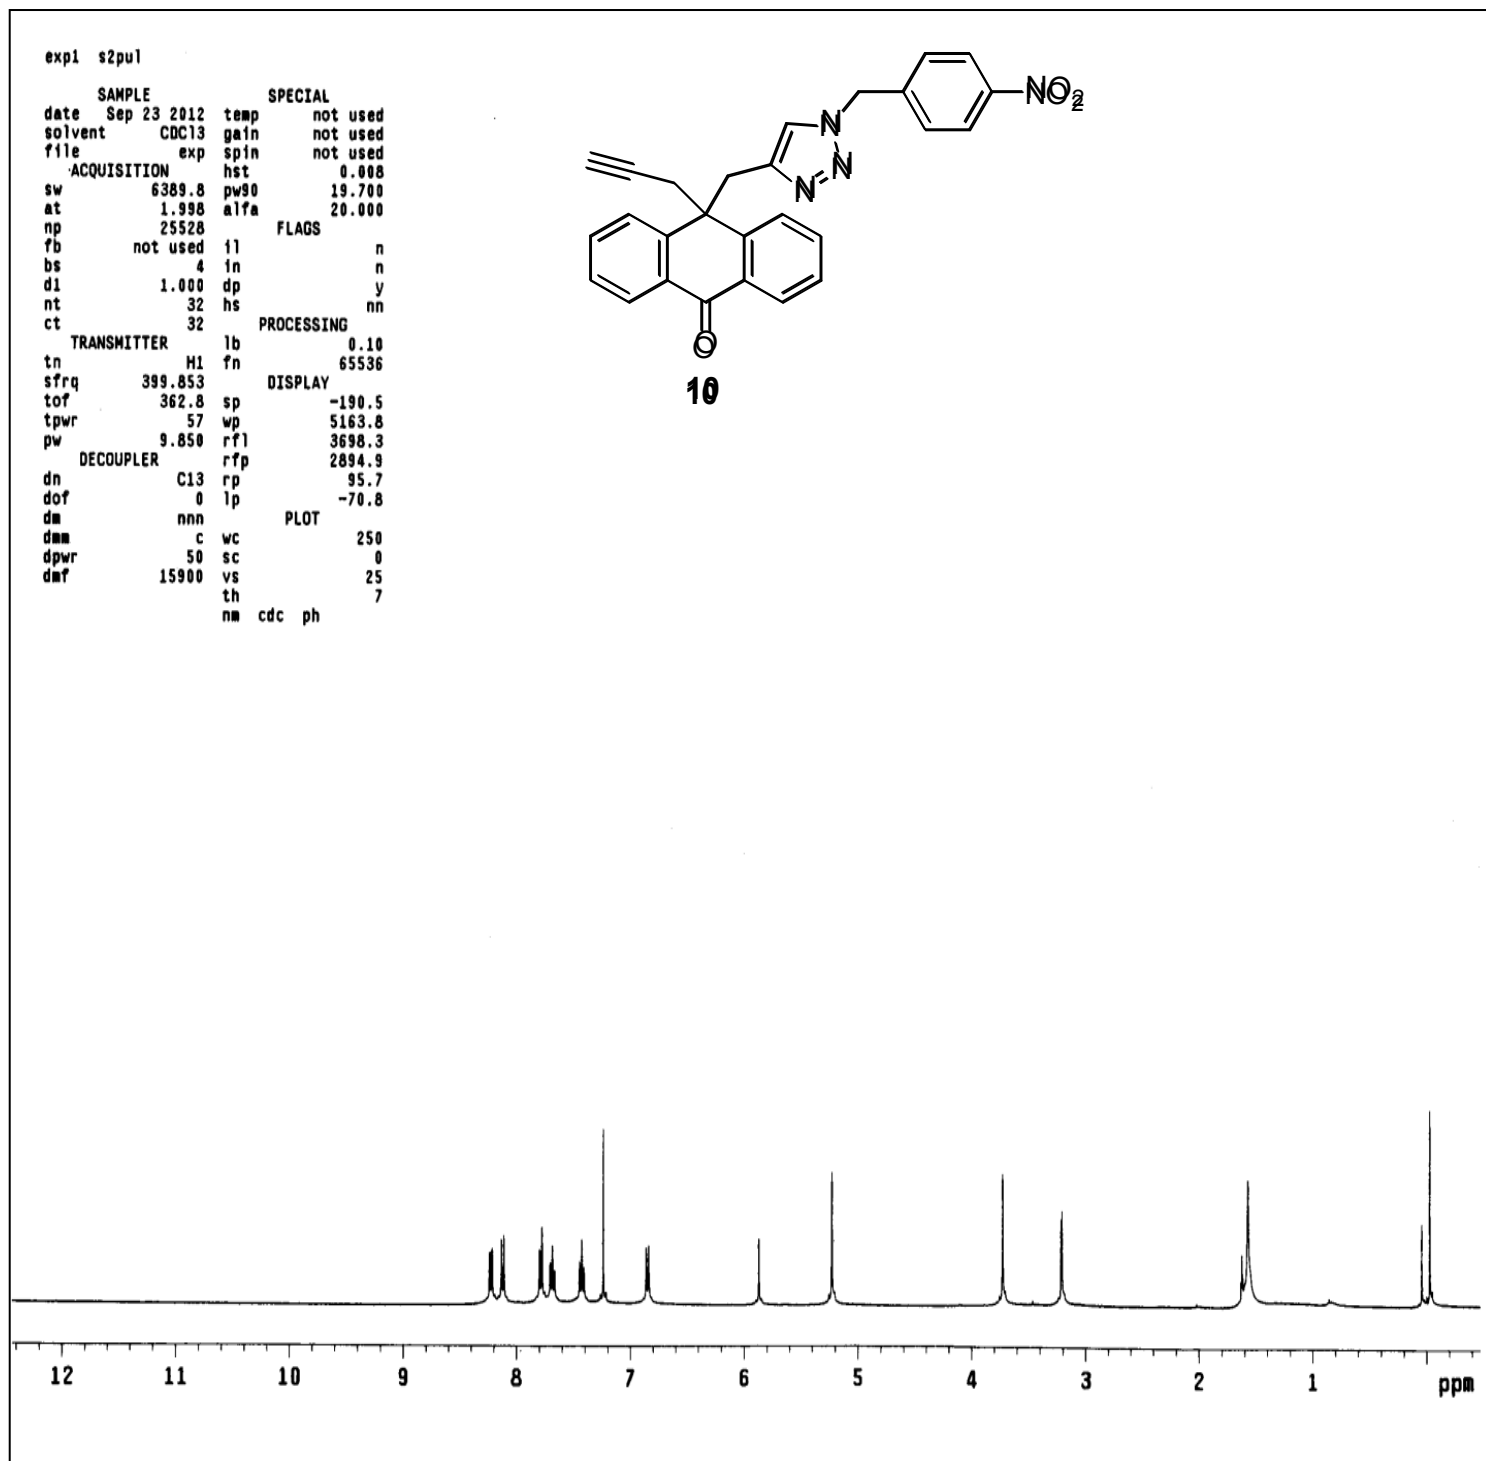

<sup>13</sup>C NMR spectra of **10**

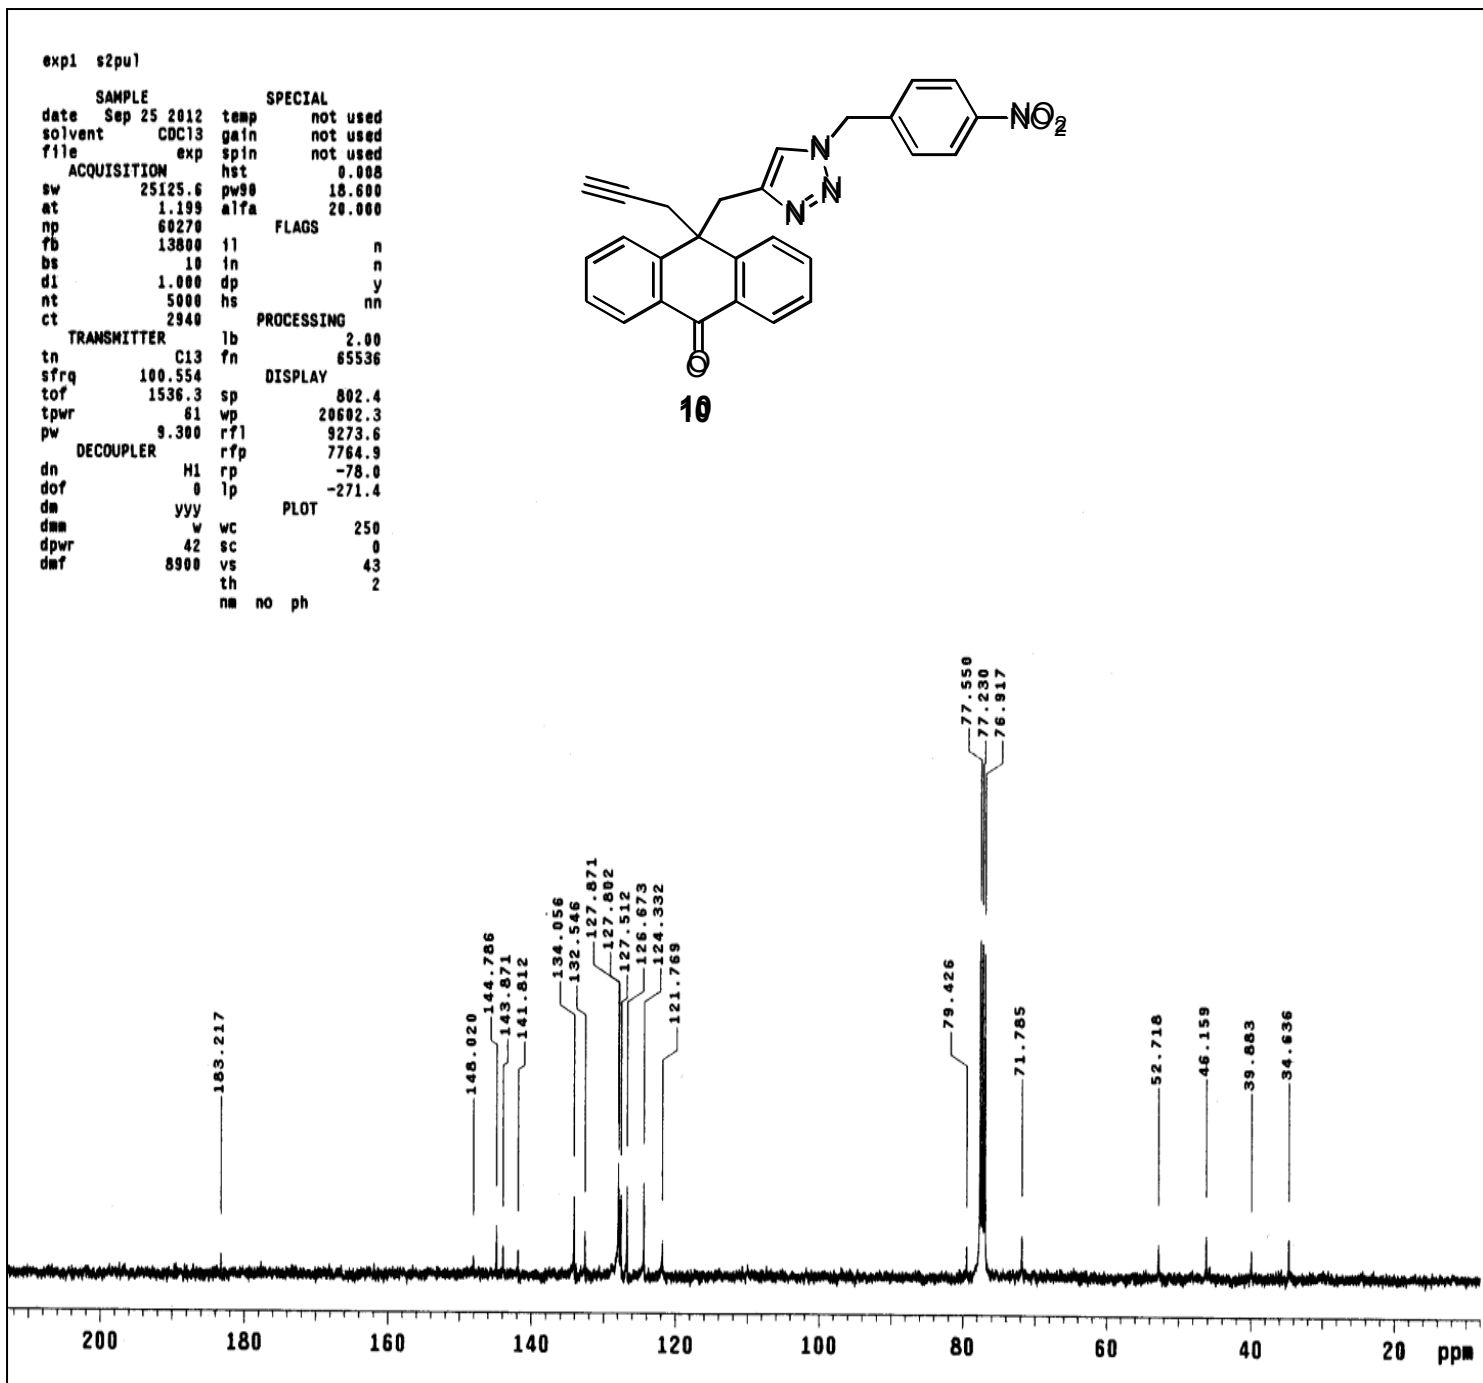

<sup>1</sup>H NMR spectra of 11

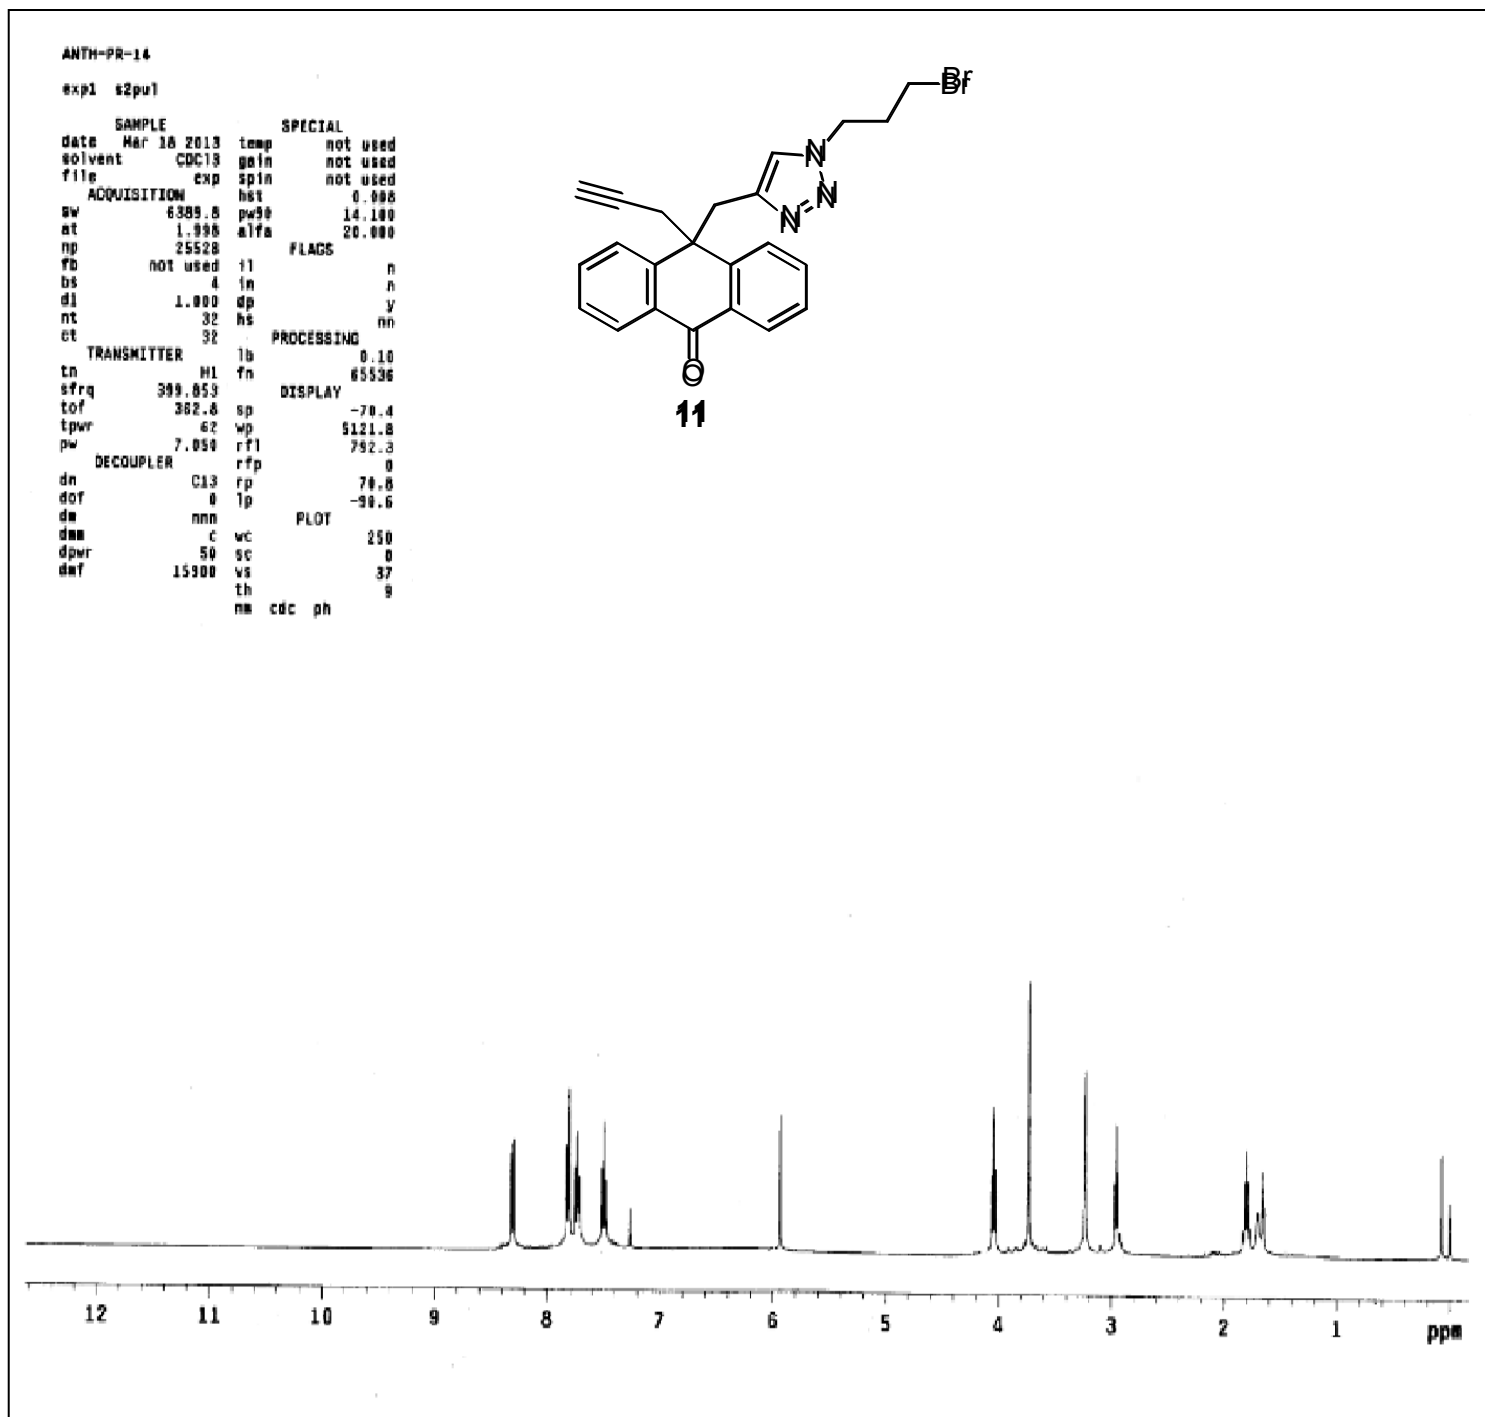

$^{13}\text{C}$  NMR spectra of **11**

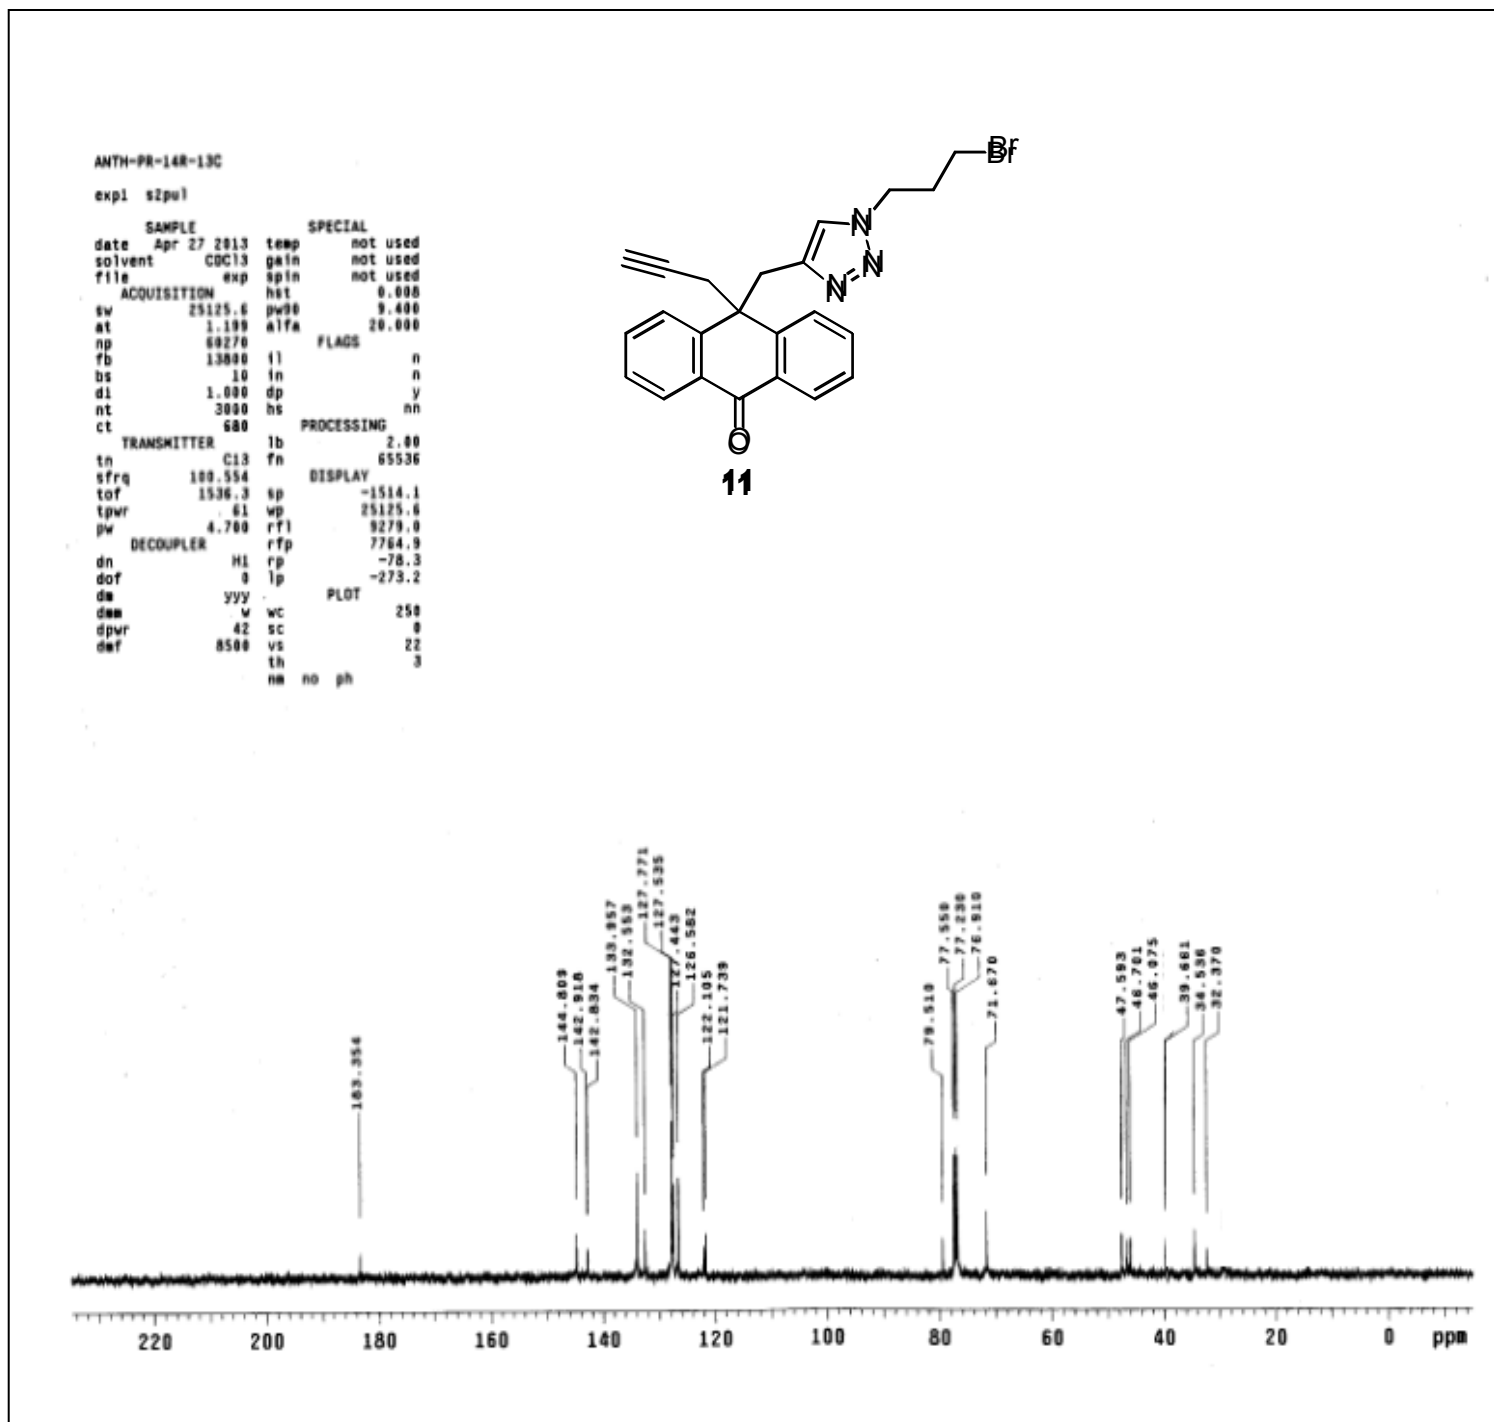

<sup>1</sup>H NMR spectra of **12a**

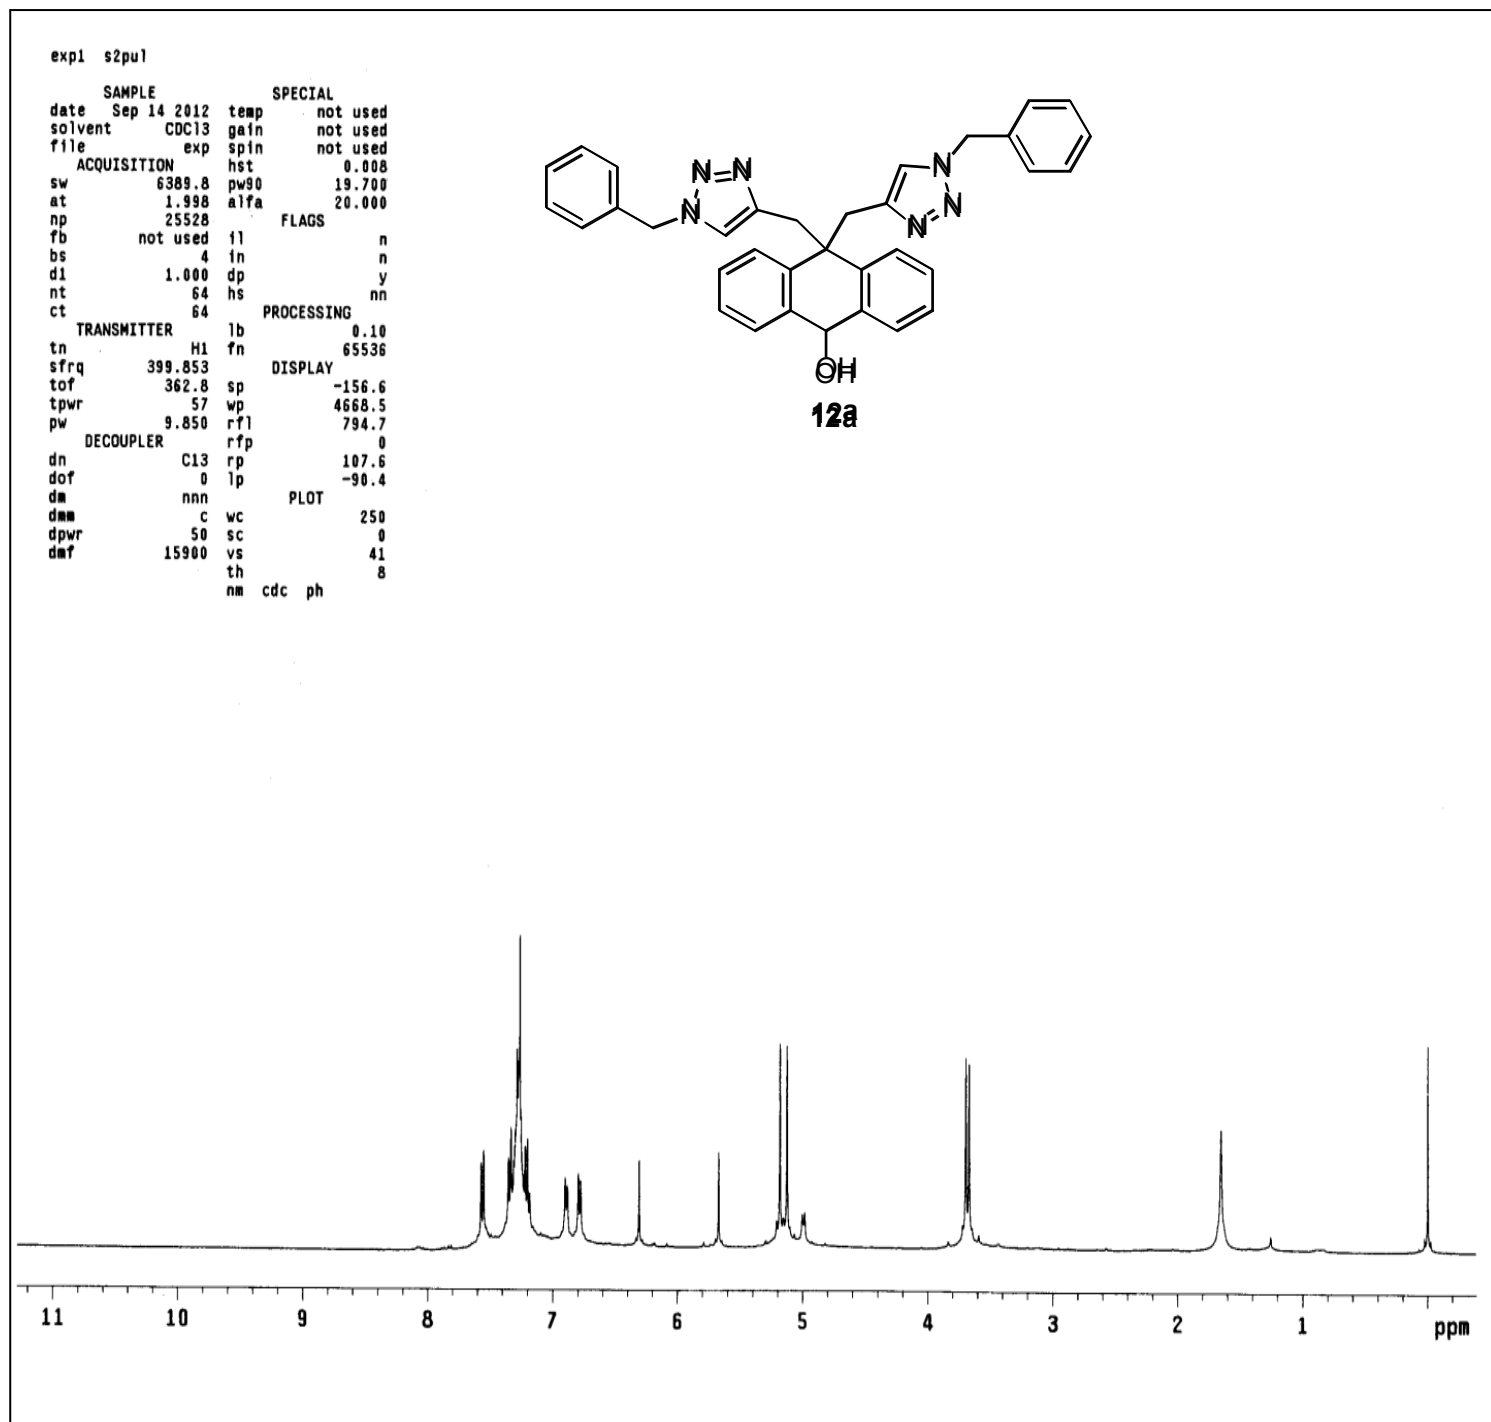

<sup>13</sup>C NMR spectra of 12a

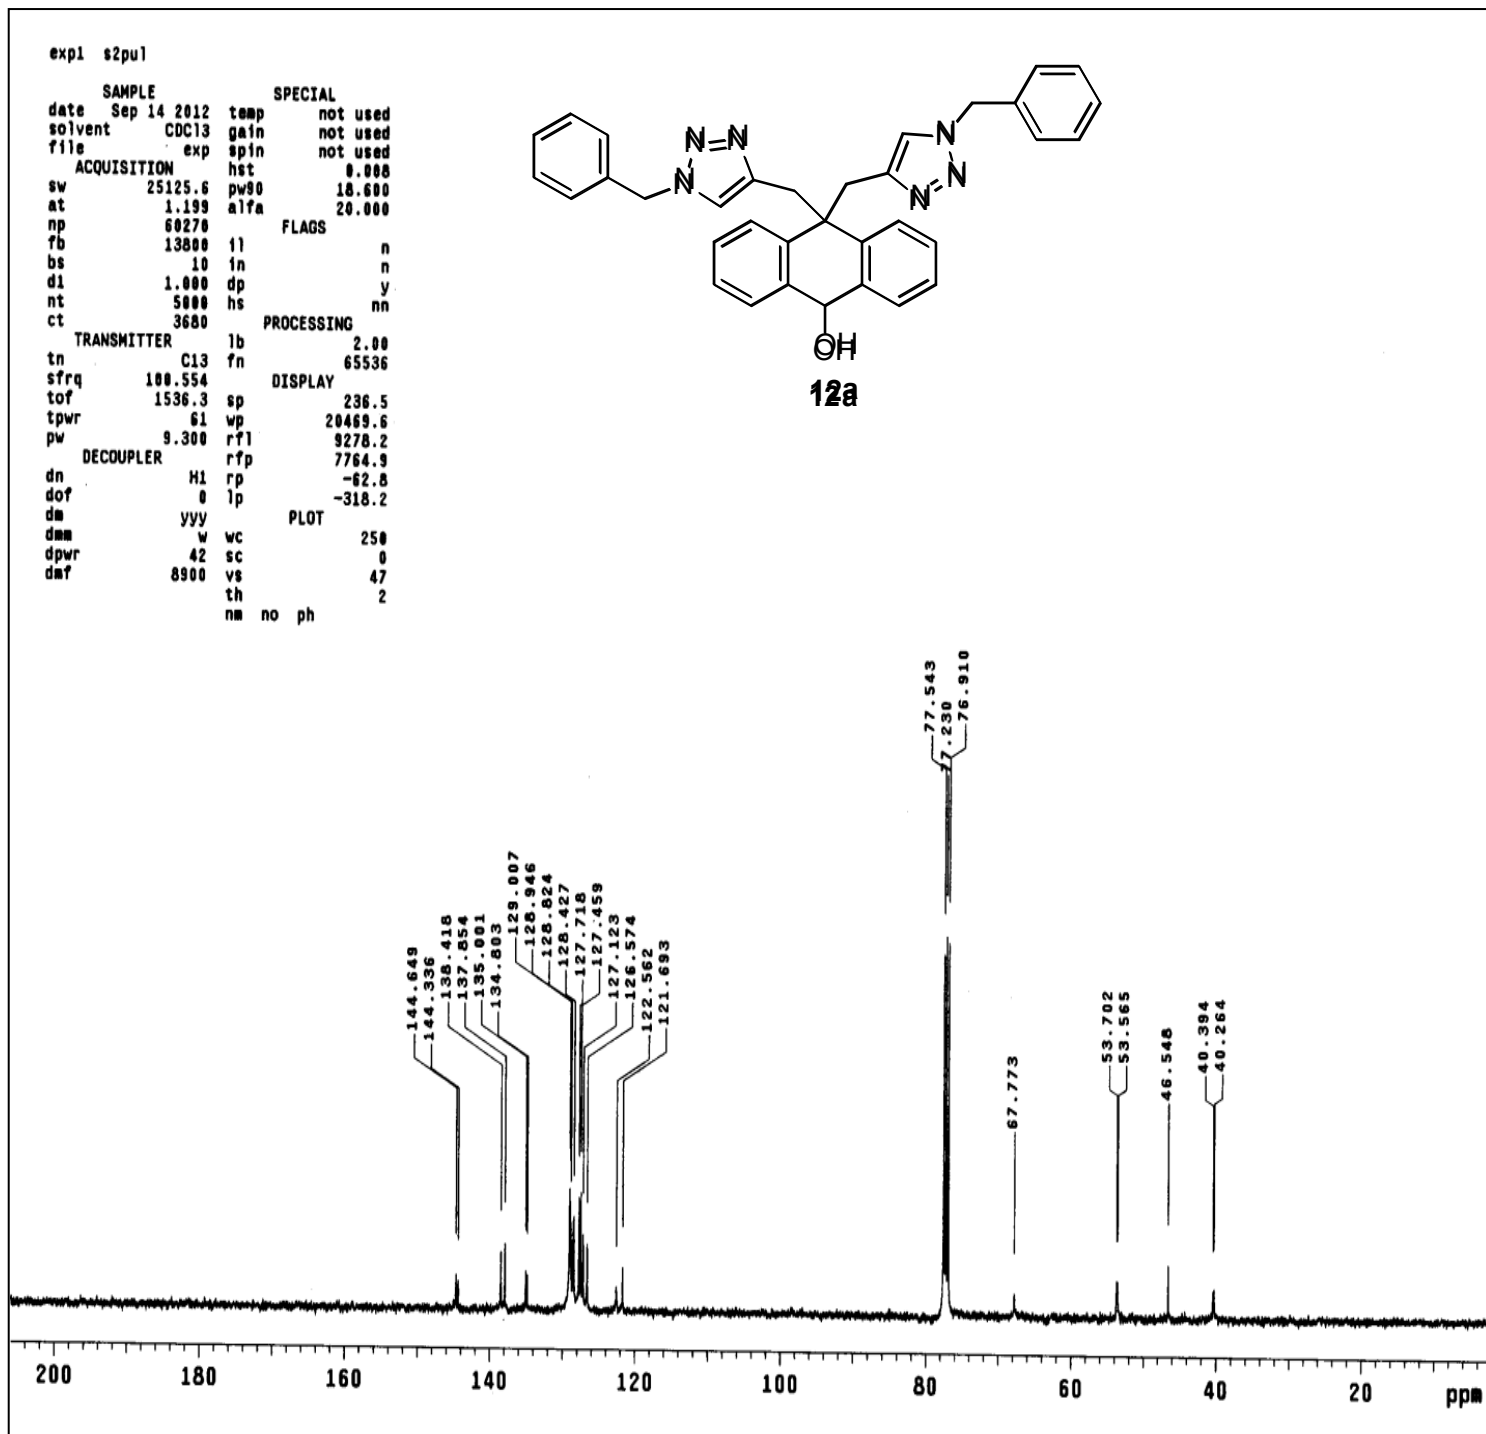

<sup>1</sup>H NMR spectra of **12b**

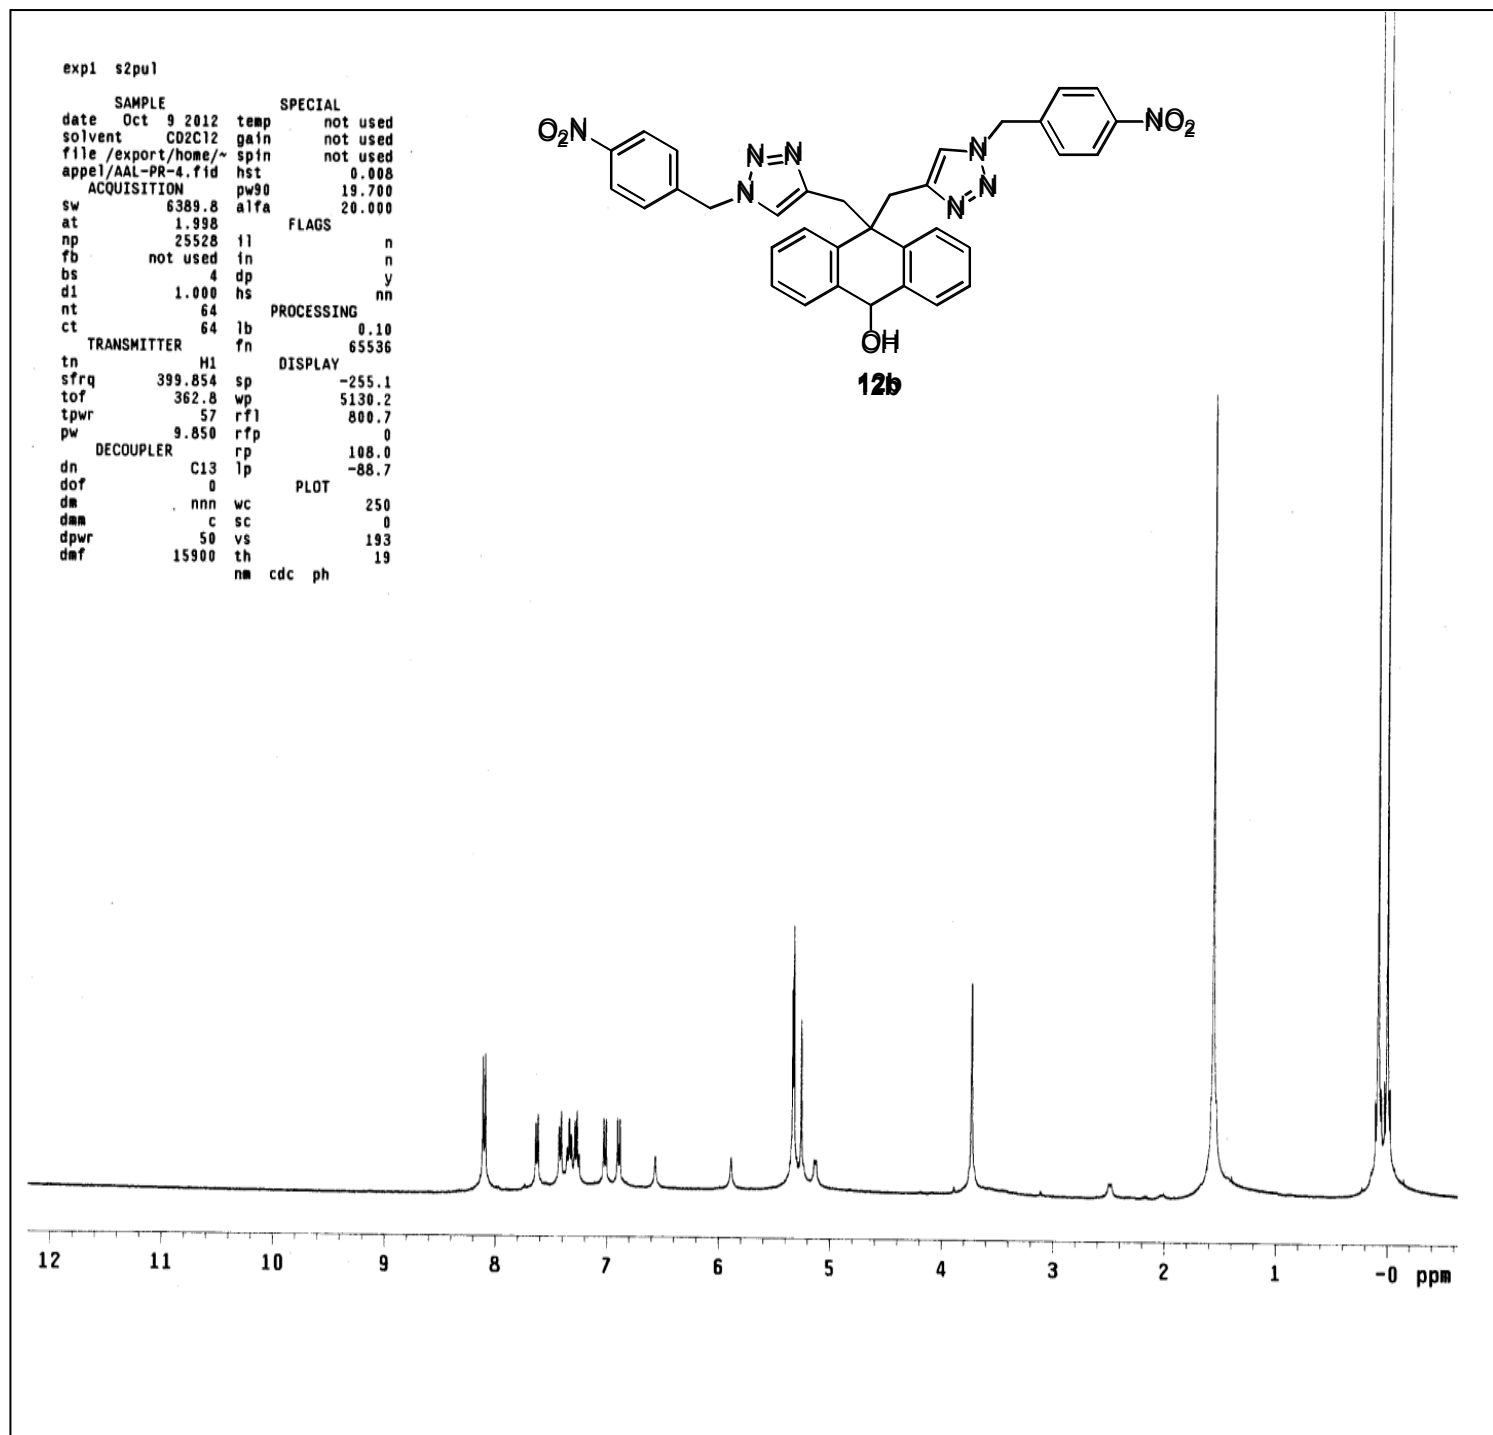



<sup>13</sup>C NMR spectra of 12b

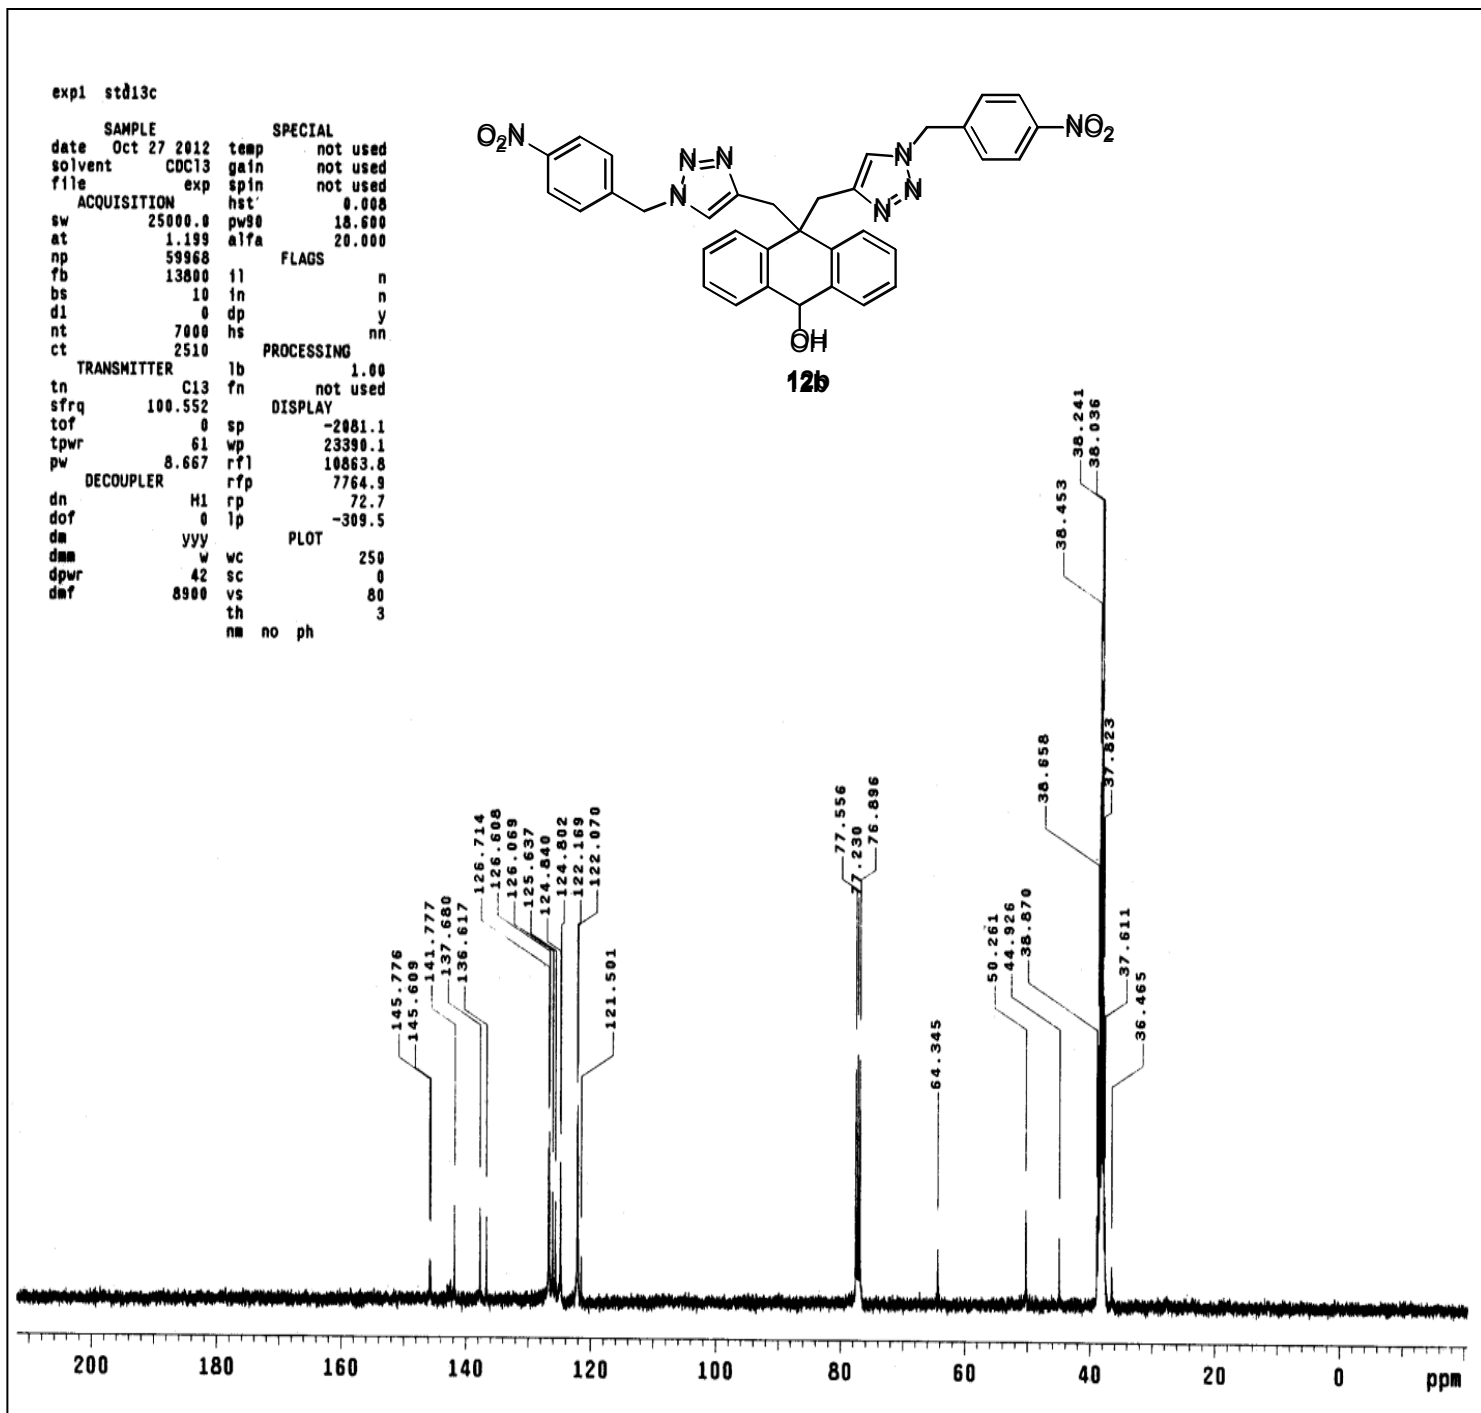

<sup>1</sup>H NMR spectra of **12c**

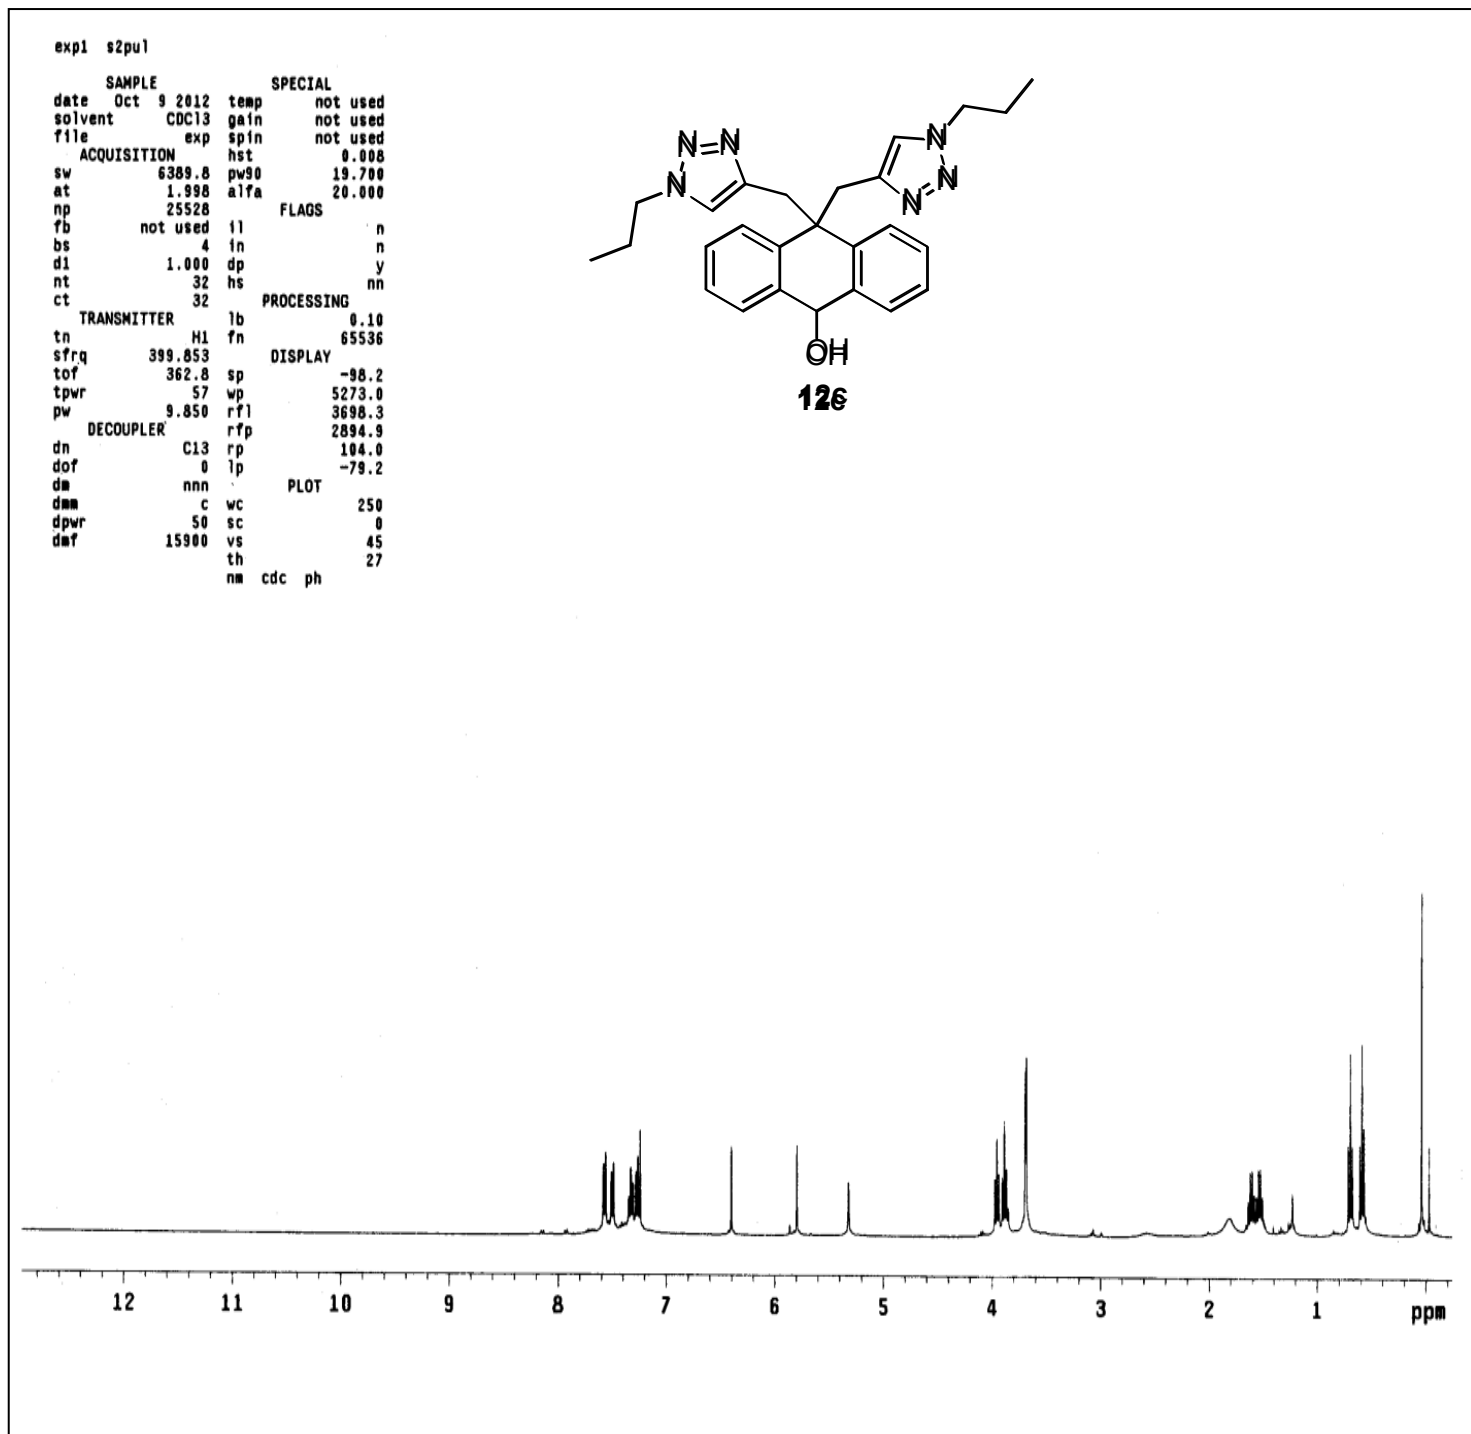

<sup>13</sup>C NMR spectra of 12c

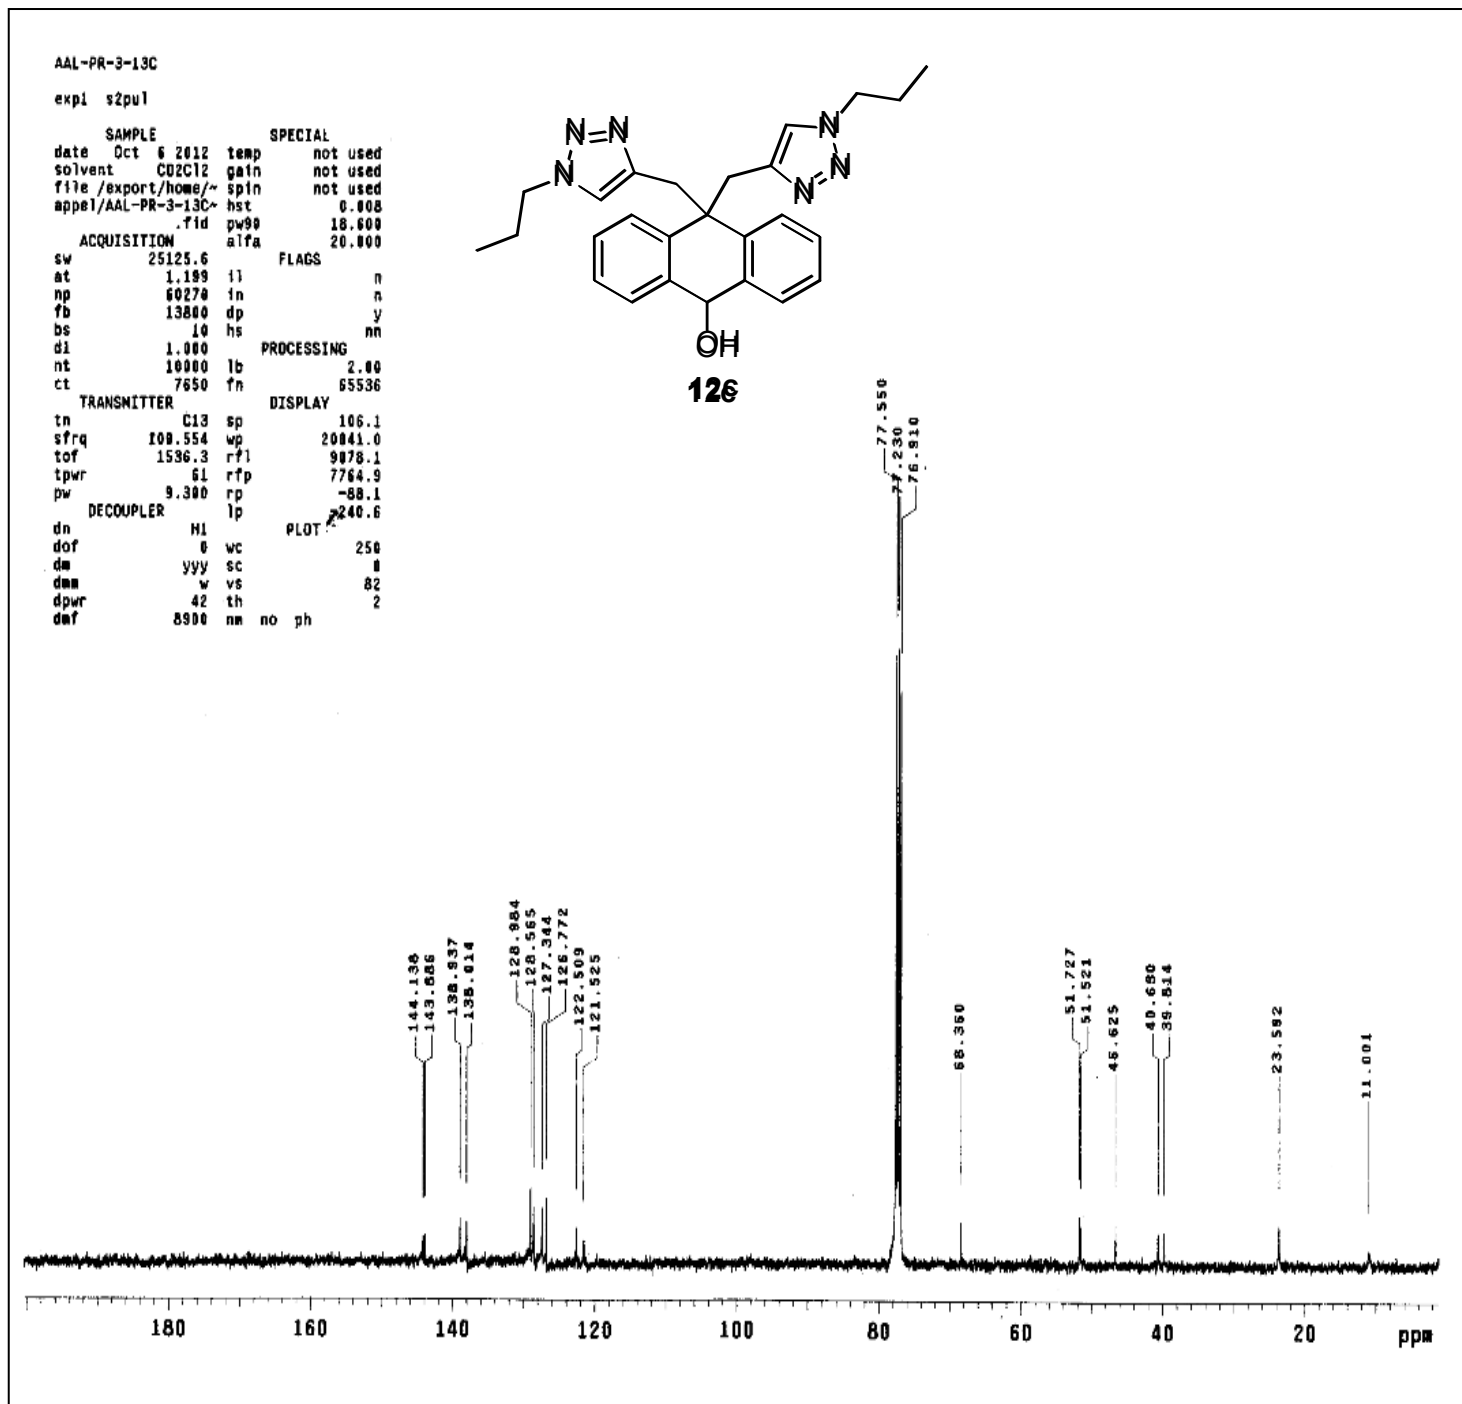

<sup>1</sup>H NMR spectra of **12d**

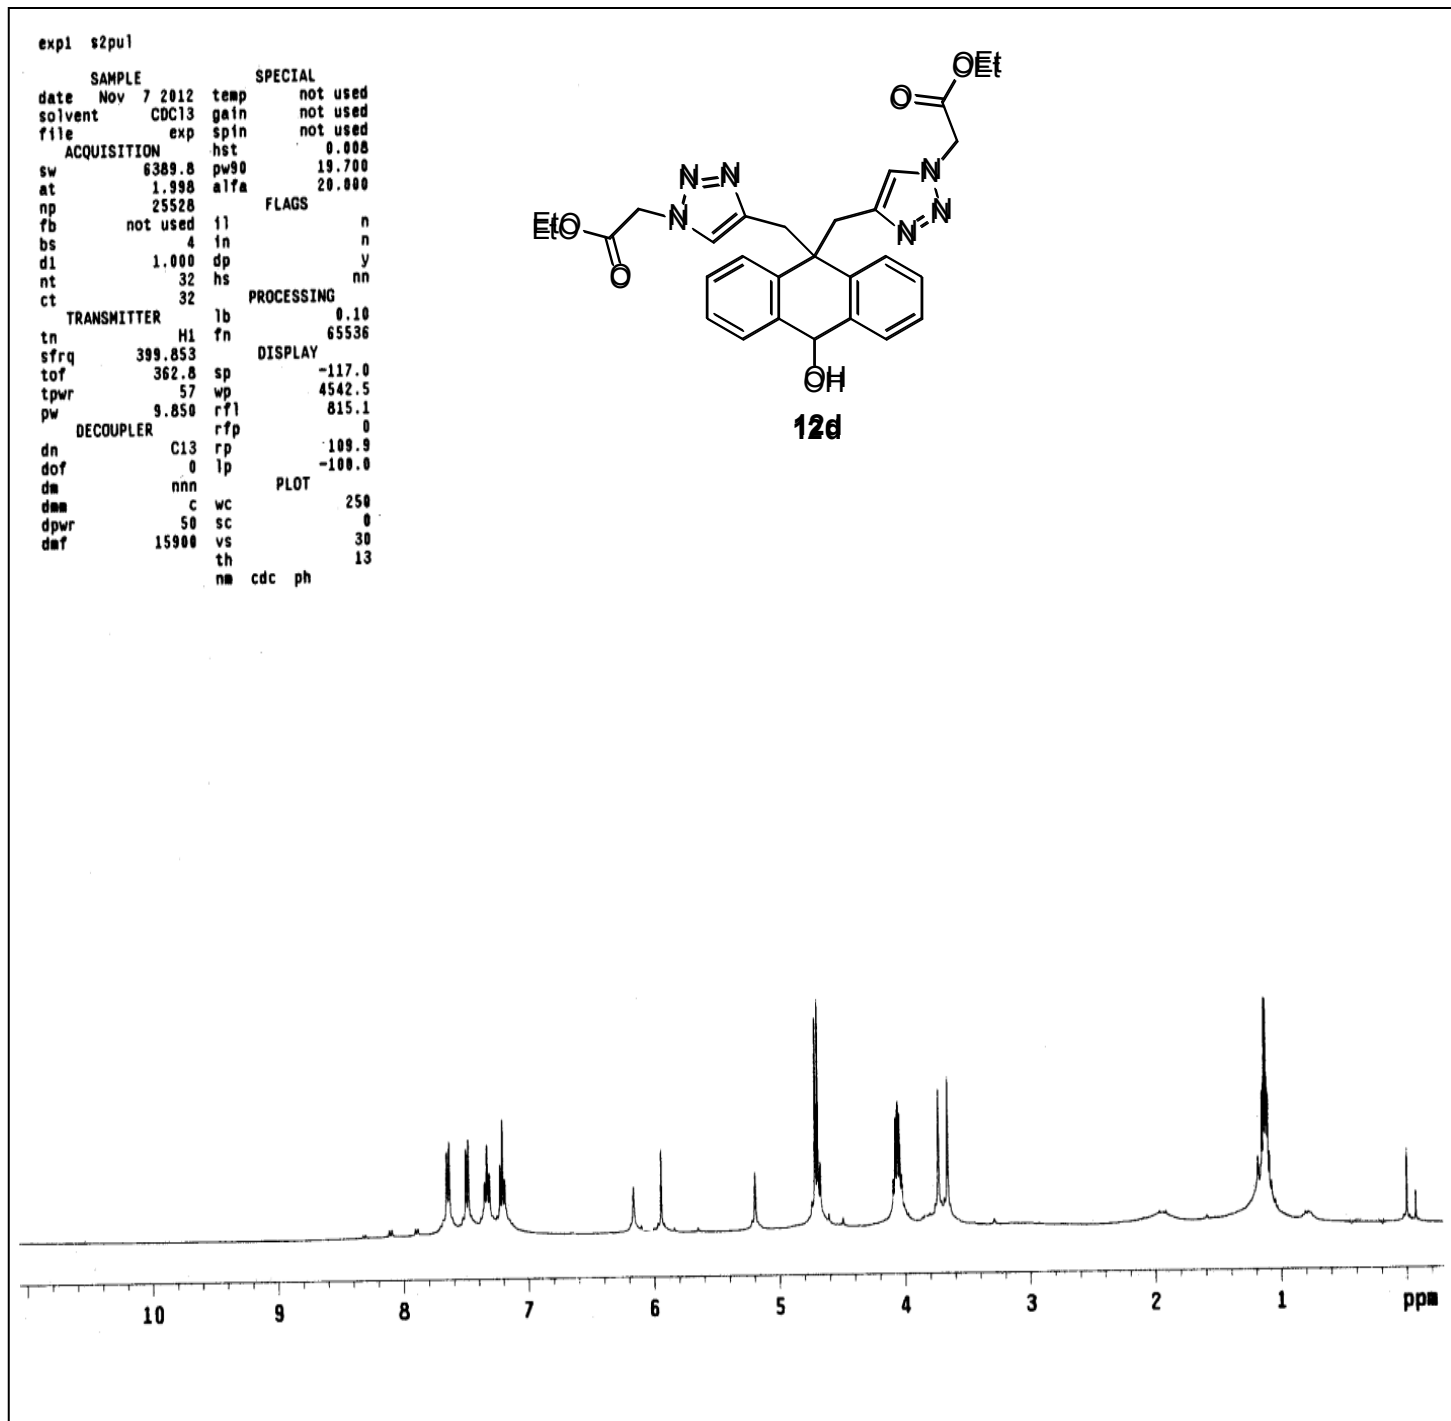

<sup>13</sup>C NMR spectra of 12d

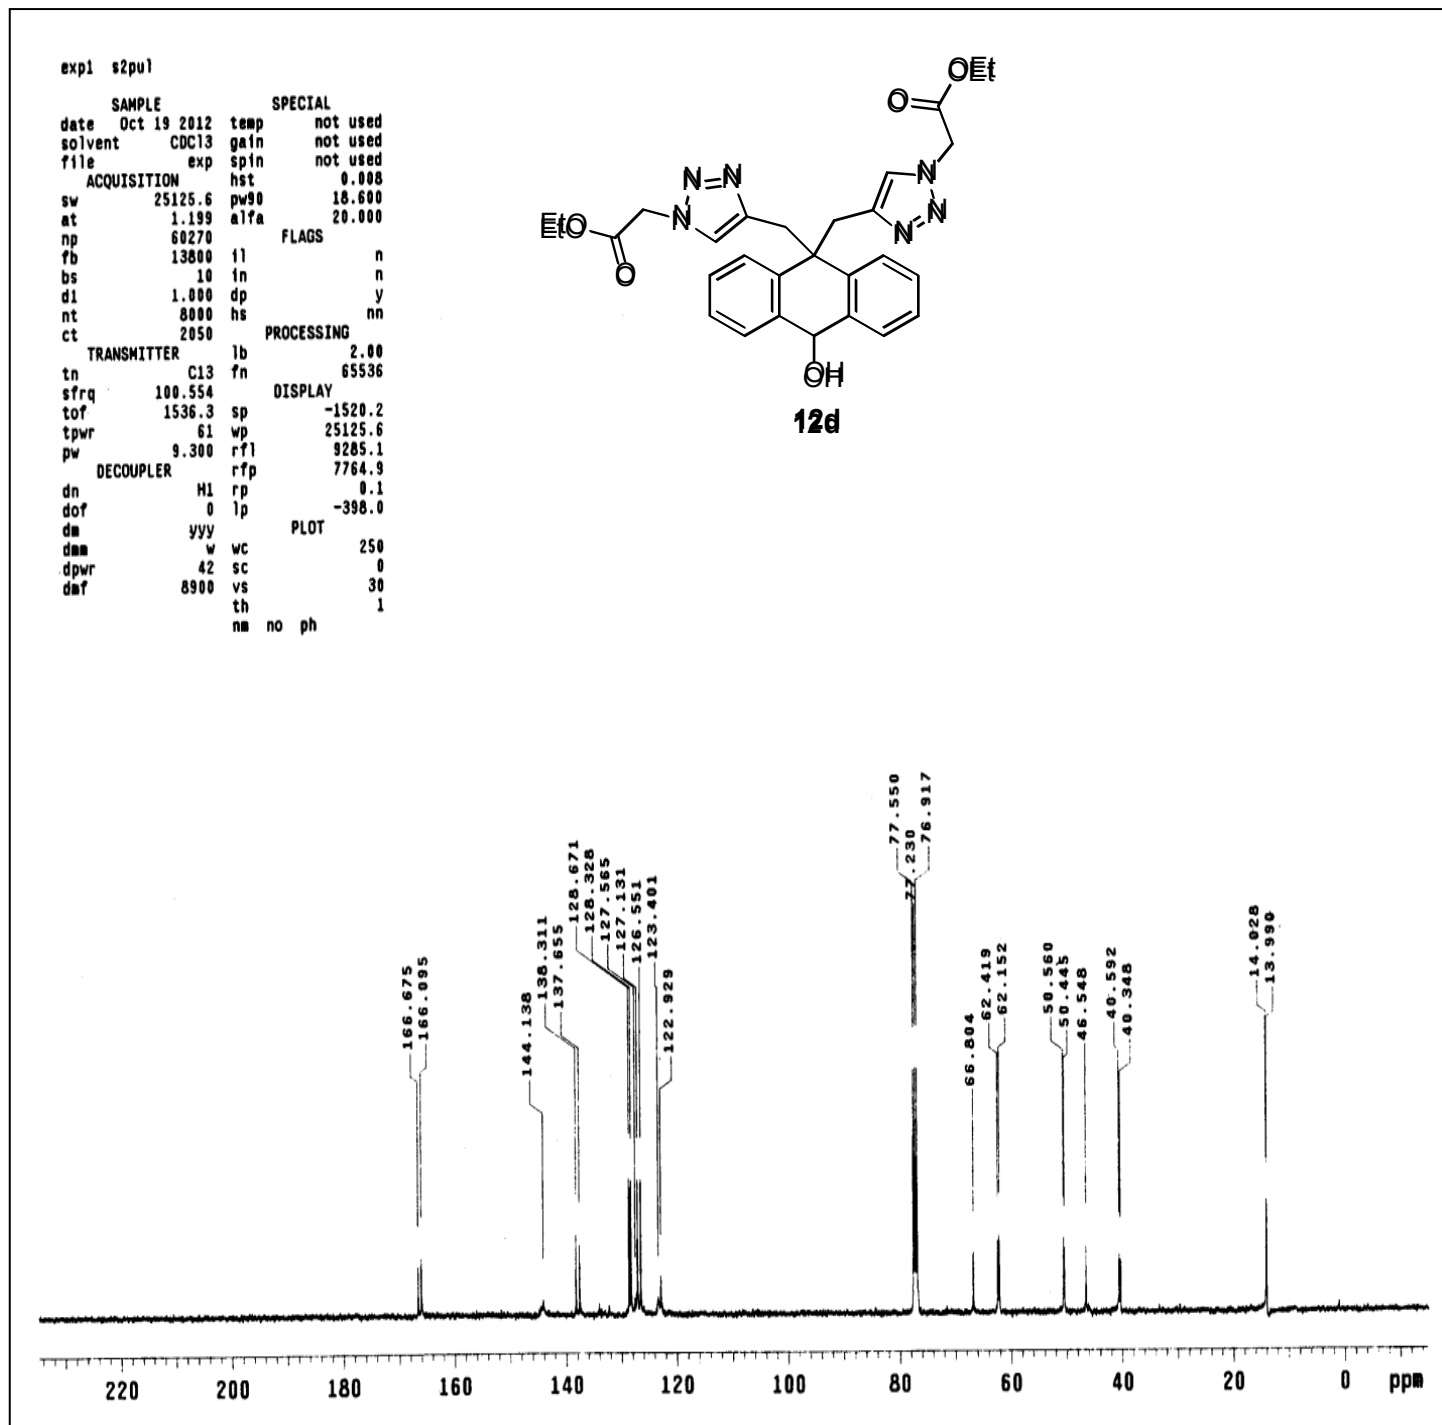

<sup>1</sup>H NMR spectra of 13

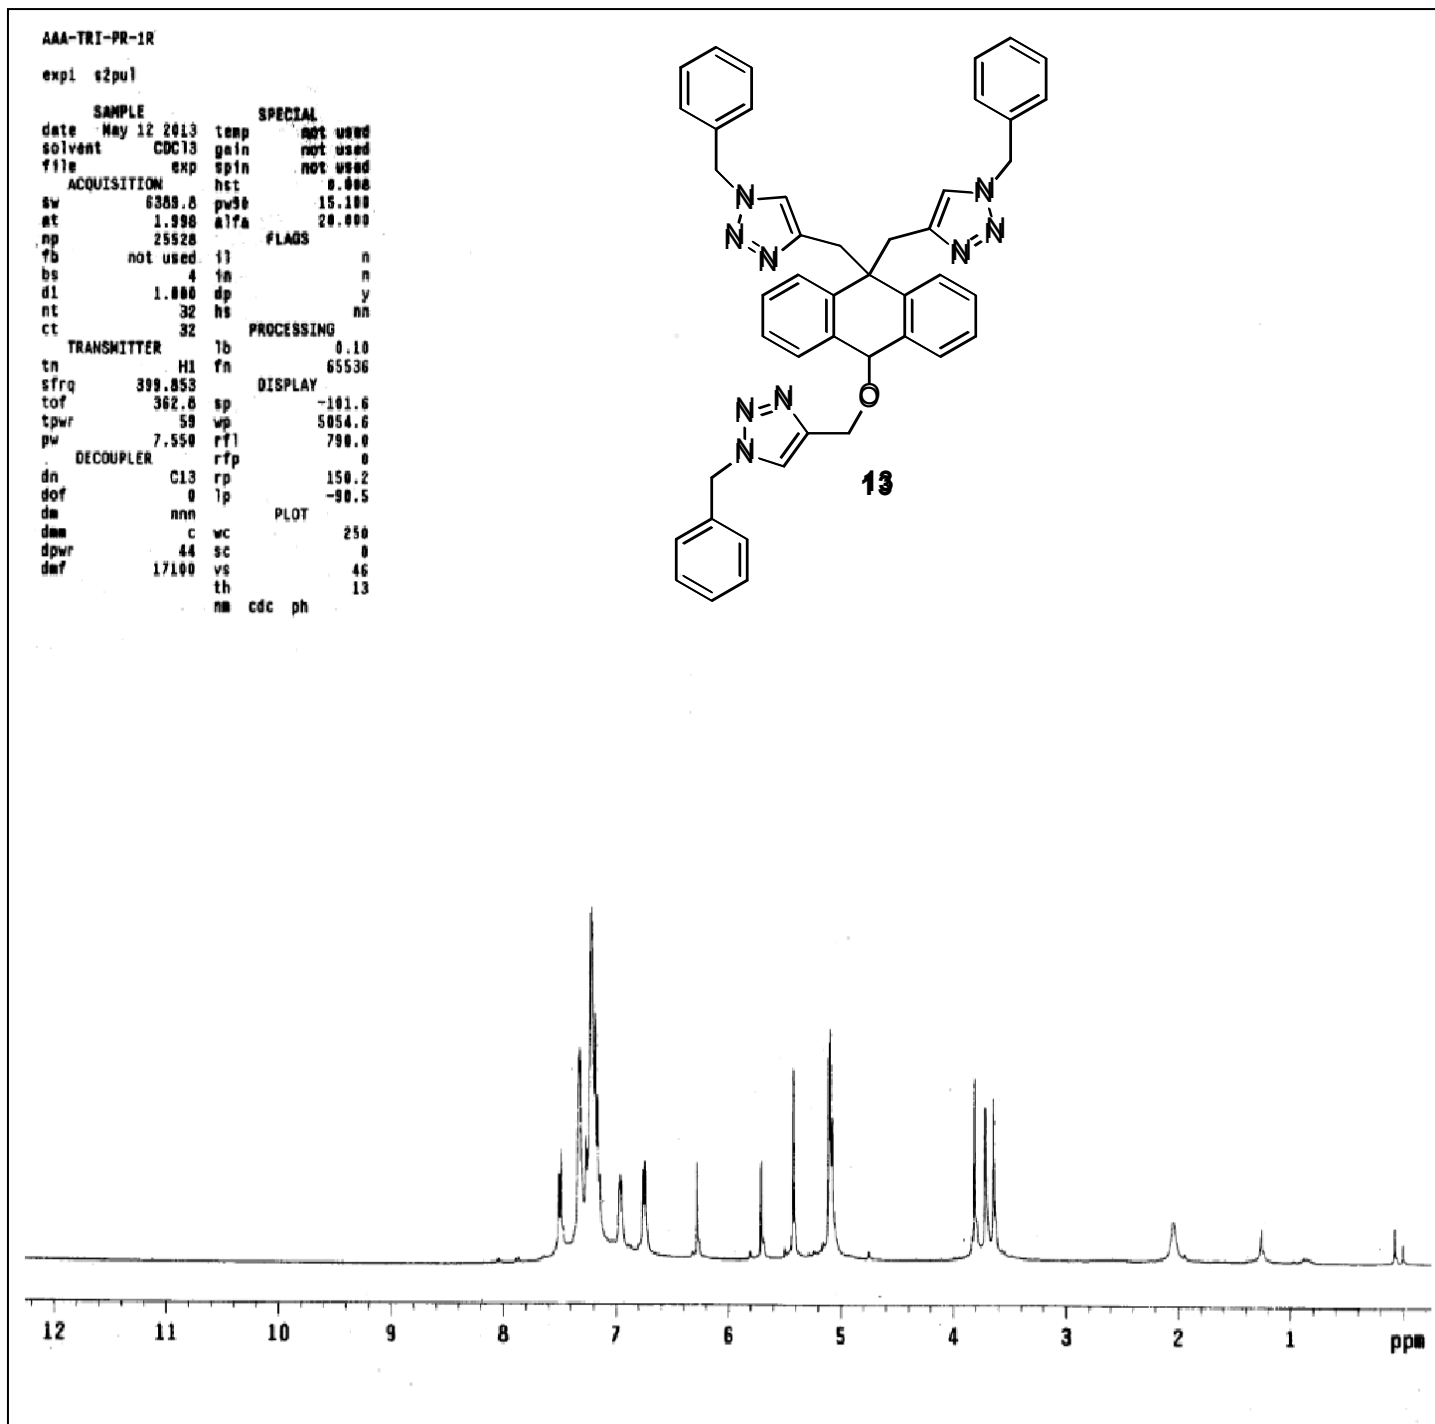

<sup>13</sup>C NMR spectra of **13**

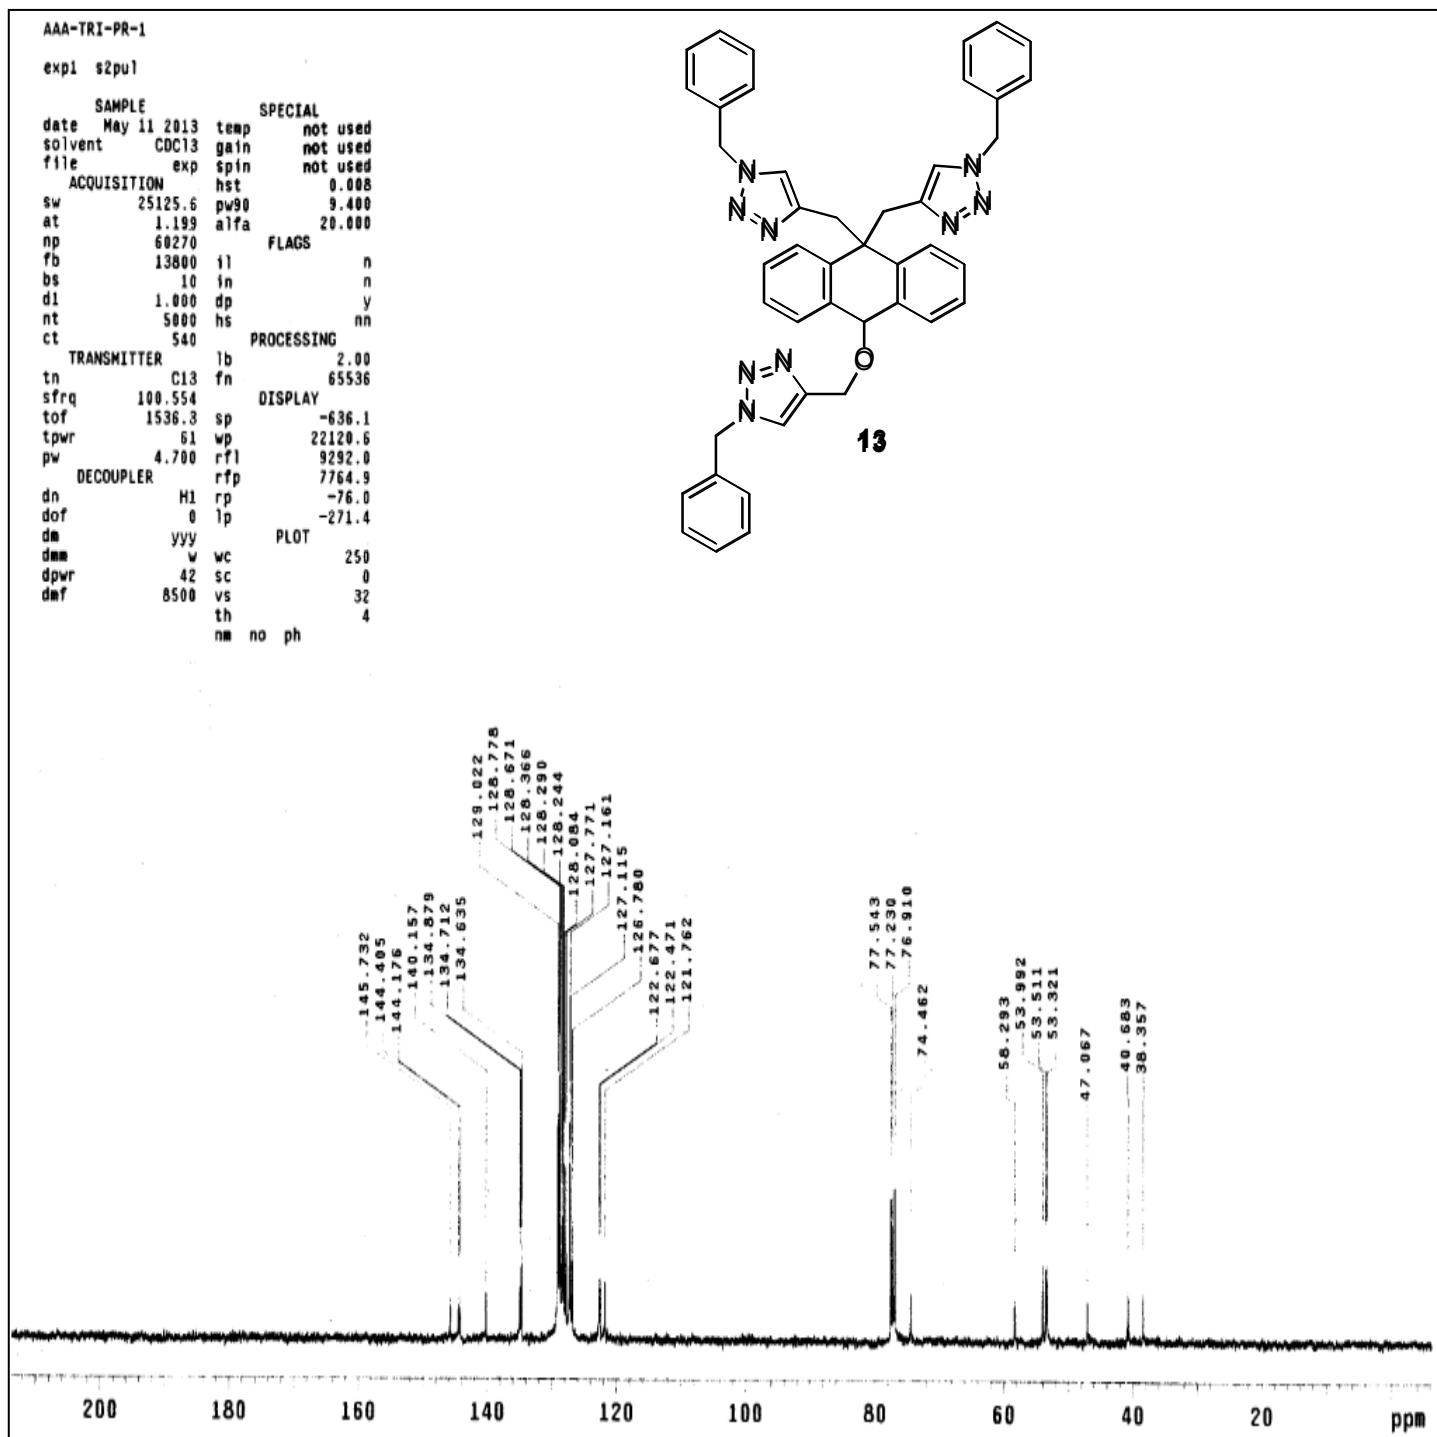

Supplement: c3ra44869j.pdf [file c3ra44869j.pdf]
